# Supplementary material for: Bluetongue Virus NS4 Protein Is an Interferon Antagonist and a Determinant of Virus Virulence
Source: PubMed Central journal article supplement (PMC4934764; doi:10.1128/jvi.00422-16), 2016-05-12
Supplement: JVI.00422-16_zjv999181675so1.pdf [file JVI.00422-16_zjv999181675so1.pdf]

**Table S1. Differentially expressed genes in BTV8wt- compared to mock-infected A549 cells.**

| Gene symbol | Fold change (log2) | P-value <sup>(a)</sup> | Q-value <sup>(b)</sup> (<0.05) |
|-------------|--------------------|------------------------|--------------------------------|
| GOLGA6B     | 5.29417            | 0.0042                 | 0.029379                       |
| TNFSF4      | 5.1774             | 5.00E-05               | 0.000967                       |
| FOSB        | 5.13067            | 5.00E-05               | 0.000967                       |
| NID1        | 5.12621            | 5.00E-05               | 0.000967                       |
| OAS2        | 5.07037            | 5.00E-05               | 0.000967                       |
| EGR1        | 5.04055            | 5.00E-05               | 0.000967                       |
| KLRC4       | 5.01435            | 0.00075                | 0.008257                       |
| EGR2        | 4.99273            | 5.00E-05               | 0.000967                       |
| CA1         | 4.94783            | 5.00E-05               | 0.000967                       |
| KLRC2       | 4.85722            | 5.00E-05               | 0.000967                       |
| IFNL1       | 4.85015            | 5.00E-05               | 0.000967                       |
| LY6G6D      | 4.8236             | 0.0042                 | 0.029379                       |
| OASL        | 4.82132            | 5.00E-05               | 0.000967                       |
| IFIT2       | 4.69685            | 5.00E-05               | 0.000967                       |
| FOS         | 4.6624             | 5.00E-05               | 0.000967                       |
| IL1RL1      | 4.63597            | 5.00E-05               | 0.000967                       |
| CCR4        | 4.58683            | 5.00E-05               | 0.000967                       |
| CH25H       | 4.56111            | 0.00295                | 0.022658                       |
| FAM71A      | 4.55619            | 5.00E-05               | 0.000967                       |
| HSPA6       | 4.51161            | 5.00E-05               | 0.000967                       |
| RAET1L      | 4.45823            | 0.0029                 | 0.022408                       |
| IFIH1       | 4.45597            | 5.00E-05               | 0.000967                       |
| LY6G6C      | 4.44981            | 5.00E-05               | 0.000967                       |
| CXCL11      | 4.42392            | 0.00125                | 0.012208                       |
| IFI44       | 4.4202             | 5.00E-05               | 0.000967                       |
| TYRP1       | 4.3747             | 5.00E-05               | 0.000967                       |
| DUSP8       | 4.36605            | 0.0024                 | 0.019631                       |
| FNDC7       | 4.33015            | 5.00E-05               | 0.000967                       |
| IL8         | 4.3058             | 5.00E-05               | 0.000967                       |
| FAM182B     | 4.29125            | 0.0002                 | 0.003062                       |
| FAP         | 4.27405            | 5.00E-05               | 0.000967                       |
| LTA         | 4.25327            | 5.00E-05               | 0.000967                       |
| HSPA7       | 4.24313            | 5.00E-05               | 0.000967                       |
| MOBP        | 4.22447            | 5.00E-05               | 0.000967                       |
| HIST1H2BG   | 4.19766            | 5.00E-05               | 0.000967                       |
| IFIT1       | 4.18893            | 5.00E-05               | 0.000967                       |
| KIAA1045    | 4.18693            | 5.00E-05               | 0.000967                       |
| ARL14       | 4.18639            | 5.00E-05               | 0.000967                       |
| MX1         | 4.15104            | 5.00E-05               | 0.000967                       |
| IFIT3       | 4.14016            | 5.00E-05               | 0.000967                       |
| IFNB1       | 4.13006            | 5.00E-05               | 0.000967                       |
| AOC3        | 4.12595            | 5.00E-05               | 0.000967                       |
| TULP2       | 4.10406            | 5.00E-05               | 0.000967                       |
| MMP25       | 4.10341            | 5.00E-05               | 0.000967                       |
| C1orf189    | 4.09977            | 5.00E-05               | 0.000967                       |

|              |         |          |          |
|--------------|---------|----------|----------|
| SLC1A3       | 4.06054 | 5.00E-05 | 0.000967 |
| ALOXE3       | 4.05268 | 5.00E-05 | 0.000967 |
| ZNF880       | 4.02872 | 0.00105  | 0.010623 |
| GOLGA6C      | 4.02692 | 0.0001   | 0.001745 |
| RSAD2        | 4.02467 | 5.00E-05 | 0.000967 |
| KLRC3        | 4.02426 | 5.00E-05 | 0.000967 |
| C20orf195    | 4.01489 | 5.00E-05 | 0.000967 |
| ESR1         | 3.99705 | 5.00E-05 | 0.000967 |
| CTRC         | 3.94739 | 0.0007   | 0.007858 |
| LMOD2        | 3.94461 | 5.00E-05 | 0.000967 |
| RFPL4A       | 3.92458 | 0.0005   | 0.006117 |
| OR2B6        | 3.91393 | 5.00E-05 | 0.000967 |
| SELPLG       | 3.90697 | 5.00E-05 | 0.000967 |
| EGR4         | 3.89578 | 5.00E-05 | 0.000967 |
| CCDC11       | 3.88493 | 5.00E-05 | 0.000967 |
| CREB5        | 3.87514 | 5.00E-05 | 0.000967 |
| HIST1H3G     | 3.84993 | 5.00E-05 | 0.000967 |
| OVOL1        | 3.84897 | 5.00E-05 | 0.000967 |
| KLRC1        | 3.84074 | 0.00025  | 0.003659 |
| HDAC9        | 3.82778 | 5.00E-05 | 0.000967 |
| KBTBD13      | 3.82493 | 5.00E-05 | 0.000967 |
| C11orf91     | 3.82231 | 5.00E-05 | 0.000967 |
| IFNL2        | 3.81902 | 5.00E-05 | 0.000967 |
| HERC5        | 3.81038 | 5.00E-05 | 0.000967 |
| IL17RE       | 3.80802 | 5.00E-05 | 0.000967 |
| ARL14EPL     | 3.80413 | 0.00015  | 0.002431 |
| ZNF300P1     | 3.79365 | 0.0001   | 0.001745 |
| KRTAP5-9     | 3.78753 | 0.0056   | 0.036355 |
| GIF          | 3.78503 | 0.00035  | 0.004678 |
| TEX37        | 3.78491 | 0.0005   | 0.006117 |
| MX2          | 3.76595 | 5.00E-05 | 0.000967 |
| EPPK1        | 3.76031 | 5.00E-05 | 0.000967 |
| ISG15        | 3.73909 | 5.00E-05 | 0.000967 |
| CD200R1      | 3.72982 | 5.00E-05 | 0.000967 |
| HPX          | 3.72707 | 5.00E-05 | 0.000967 |
| NFE2         | 3.72239 | 5.00E-05 | 0.000967 |
| C19orf69     | 3.71714 | 0.002    | 0.017269 |
| IRGM         | 3.70614 | 5.00E-05 | 0.000967 |
| GCG          | 3.70298 | 0.0025   | 0.02025  |
| SLC6A12      | 3.67616 | 5.00E-05 | 0.000967 |
| DSC1         | 3.67222 | 5.00E-05 | 0.000967 |
| LOC100507206 | 3.66951 | 5.00E-05 | 0.000967 |
| SCUBE2       | 3.64948 | 5.00E-05 | 0.000967 |
| KDM6B        | 3.63942 | 5.00E-05 | 0.000967 |
| C6orf25      | 3.63336 | 5.00E-05 | 0.000967 |
| PLA2G4C      | 3.63276 | 5.00E-05 | 0.000967 |
| LGR5         | 3.63262 | 5.00E-05 | 0.000967 |
| OR5AU1       | 3.61021 | 0.0021   | 0.017919 |
| CASS4        | 3.60942 | 5.00E-05 | 0.000967 |

|           |         |          |          |
|-----------|---------|----------|----------|
| TPRX1     | 3.60126 | 0.0006   | 0.007015 |
| HIST1H2AE | 3.59591 | 5.00E-05 | 0.000967 |
| ADAMTSL4  | 3.59381 | 5.00E-05 | 0.000967 |
| IFNL3     | 3.5908  | 5.00E-05 | 0.000967 |
| OR13A1    | 3.58527 | 0.00015  | 0.002431 |
| SPACA4    | 3.57752 | 5.00E-05 | 0.000967 |
| CASQ1     | 3.57676 | 5.00E-05 | 0.000967 |
| DHDH      | 3.56466 | 5.00E-05 | 0.000967 |
| HK3       | 3.56078 | 0.00035  | 0.004678 |
| OR2AE1    | 3.55476 | 0.0013   | 0.01252  |
| ACTA1     | 3.54154 | 5.00E-05 | 0.000967 |
| SLC6A13   | 3.51501 | 5.00E-05 | 0.000967 |
| HCLS1     | 3.51402 | 5.00E-05 | 0.000967 |
| FAM71F1   | 3.51359 | 5.00E-05 | 0.000967 |
| SYT5      | 3.50348 | 5.00E-05 | 0.000967 |
| FAM83E    | 3.4984  | 5.00E-05 | 0.000967 |
| C3orf20   | 3.4976  | 5.00E-05 | 0.000967 |
| CMPK2     | 3.48511 | 5.00E-05 | 0.000967 |
| SLC16A12  | 3.47168 | 5.00E-05 | 0.000967 |
| IFNA5     | 3.46386 | 0.004    | 0.02841  |
| DDX58     | 3.46113 | 5.00E-05 | 0.000967 |
| C6orf222  | 3.44699 | 5.00E-05 | 0.000967 |
| DHX58     | 3.44683 | 5.00E-05 | 0.000967 |
| TNF       | 3.43605 | 5.00E-05 | 0.000967 |
| ITGAM     | 3.43508 | 5.00E-05 | 0.000967 |
| MAFF      | 3.41791 | 5.00E-05 | 0.000967 |
| TCTE1     | 3.41761 | 5.00E-05 | 0.000967 |
| FCER1G    | 3.41274 | 0.00345  | 0.025496 |
| TTC24     | 3.40816 | 5.00E-05 | 0.000967 |
| OR1F2P    | 3.40691 | 5.00E-05 | 0.000967 |
| FAM90A25P | 3.39635 | 5.00E-05 | 0.000967 |
| TMEM88    | 3.39178 | 5.00E-05 | 0.000967 |
| C5orf48   | 3.3868  | 0.0035   | 0.025785 |
| HIST1H1T  | 3.38114 | 5.00E-05 | 0.000967 |
| LOC643201 | 3.37486 | 5.00E-05 | 0.000967 |
| TRIM69    | 3.36928 | 5.00E-05 | 0.000967 |
| FLJ12334  | 3.35901 | 5.00E-05 | 0.000967 |
| TNFRSF9   | 3.3558  | 5.00E-05 | 0.000967 |
| CCL5      | 3.34982 | 5.00E-05 | 0.000967 |
| TMEM236   | 3.34382 | 5.00E-05 | 0.000967 |
| C10orf120 | 3.3352  | 0.00335  | 0.024946 |
| POPDC2    | 3.32977 | 5.00E-05 | 0.000967 |
| SLCO5A1   | 3.32188 | 5.00E-05 | 0.000967 |
| JUN       | 3.29393 | 5.00E-05 | 0.000967 |
| RGMA      | 3.29325 | 5.00E-05 | 0.000967 |
| ADAM21    | 3.29149 | 0.0001   | 0.001745 |
| ANKRD1    | 3.29103 | 5.00E-05 | 0.000967 |
| TG        | 3.28496 | 5.00E-05 | 0.000967 |
| CD163L1   | 3.28335 | 5.00E-05 | 0.000967 |

|              |         |          |          |
|--------------|---------|----------|----------|
| CCDC144NL    | 3.28178 | 5.00E-05 | 0.000967 |
| PLA2G12B     | 3.27595 | 0.00015  | 0.002431 |
| LOC100128770 | 3.26979 | 5.00E-05 | 0.000967 |
| CYLD         | 3.25114 | 5.00E-05 | 0.000967 |
| RFPL3S       | 3.2484  | 5.00E-05 | 0.000967 |
| ACTN2        | 3.24796 | 5.00E-05 | 0.000967 |
| MYH15        | 3.24123 | 5.00E-05 | 0.000967 |
| FCGR1B       | 3.23969 | 5.00E-05 | 0.000967 |
| GPR152       | 3.23908 | 5.00E-05 | 0.000967 |
| RNF112       | 3.22871 | 5.00E-05 | 0.000967 |
| SV2A         | 3.22587 | 5.00E-05 | 0.000967 |
| VSTM5        | 3.22523 | 0.00155  | 0.014354 |
| C13orf45     | 3.21986 | 0.0001   | 0.001745 |
| OR52I2       | 3.21474 | 0.00495  | 0.033213 |
| HIST1H2AD    | 3.20276 | 0.0066   | 0.041051 |
| TMCO2        | 3.20109 | 0.0054   | 0.035445 |
| TRAF1        | 3.19978 | 5.00E-05 | 0.000967 |
| PRDX2        | 3.18601 | 5.00E-05 | 0.000967 |
| FOXS1        | 3.18318 | 5.00E-05 | 0.000967 |
| C1orf162     | 3.18075 | 5.00E-05 | 0.000967 |
| CCDC85B      | 3.17844 | 5.00E-05 | 0.000967 |
| LRRC43       | 3.17194 | 0.0001   | 0.001745 |
| ATP1A4       | 3.17016 | 5.00E-05 | 0.000967 |
| IL32         | 3.15769 | 5.00E-05 | 0.000967 |
| RASL10B      | 3.15756 | 5.00E-05 | 0.000967 |
| LST1         | 3.15684 | 5.00E-05 | 0.000967 |
| IFI27        | 3.15153 | 5.00E-05 | 0.000967 |
| GPR50        | 3.13935 | 5.00E-05 | 0.000967 |
| MYOZ3        | 3.13925 | 5.00E-05 | 0.000967 |
| PKD1L1       | 3.1345  | 5.00E-05 | 0.000967 |
| ZFPM2        | 3.1152  | 5.00E-05 | 0.000967 |
| GPD1         | 3.11176 | 5.00E-05 | 0.000967 |
| FBLL1        | 3.10854 | 5.00E-05 | 0.000967 |
| TRHR         | 3.10532 | 5.00E-05 | 0.000967 |
| ERP27        | 3.10336 | 0.0009   | 0.009427 |
| CCDC64B      | 3.09802 | 0.002    | 0.017269 |
| USH1G        | 3.09577 | 5.00E-05 | 0.000967 |
| EGR3         | 3.09211 | 5.00E-05 | 0.000967 |
| LMOD1        | 3.08821 | 5.00E-05 | 0.000967 |
| CPA2         | 3.06952 | 0.00165  | 0.015053 |
| GALR3        | 3.06679 | 5.00E-05 | 0.000967 |
| LOC728175    | 3.06434 | 0.0001   | 0.001745 |
| IL6          | 3.04262 | 5.00E-05 | 0.000967 |
| CD79A        | 3.03582 | 5.00E-05 | 0.000967 |
| GJB5         | 3.03473 | 0.0003   | 0.004153 |
| DDX60        | 3.02631 | 5.00E-05 | 0.000967 |
| OR111        | 3.01566 | 0.00295  | 0.022658 |
| SLC6A4       | 3.00715 | 5.00E-05 | 0.000967 |
| GPR26        | 3.00425 | 5.00E-05 | 0.000967 |

|              |         |          |          |
|--------------|---------|----------|----------|
| TSGA10IP     | 2.99703 | 5.00E-05 | 0.000967 |
| CRABP2       | 2.99471 | 5.00E-05 | 0.000967 |
| STC1         | 2.9795  | 5.00E-05 | 0.000967 |
| TPPP3        | 2.9778  | 0.0001   | 0.001745 |
| SLC28A1      | 2.97407 | 5.00E-05 | 0.000967 |
| C5orf56      | 2.97356 | 5.00E-05 | 0.000967 |
| IFNA8        | 2.97323 | 0.00185  | 0.016374 |
| LOC100507140 | 2.97054 | 0.00035  | 0.004678 |
| C17orf98     | 2.96746 | 0.0038   | 0.027341 |
| IL23A        | 2.95271 | 5.00E-05 | 0.000967 |
| OXER1        | 2.95221 | 5.00E-05 | 0.000967 |
| LOC574538    | 2.94808 | 0.00085  | 0.009052 |
| SRMS         | 2.93482 | 0.0006   | 0.007015 |
| MEG9         | 2.93311 | 5.00E-05 | 0.000967 |
| FAM209B      | 2.93068 | 5.00E-05 | 0.000967 |
| MRGPRD       | 2.93043 | 0.0028   | 0.021921 |
| EFNB2        | 2.92594 | 5.00E-05 | 0.000967 |
| ARID5B       | 2.92321 | 5.00E-05 | 0.000967 |
| ARL9         | 2.92096 | 5.00E-05 | 0.000967 |
| TRPC7        | 2.91277 | 5.00E-05 | 0.000967 |
| MYOC         | 2.90503 | 0.0003   | 0.004153 |
| PLEKHA4      | 2.90482 | 5.00E-05 | 0.000967 |
| SLC22A1      | 2.90308 | 5.00E-05 | 0.000967 |
| ATF3         | 2.90299 | 5.00E-05 | 0.000967 |
| SEMA4A       | 2.89964 | 5.00E-05 | 0.000967 |
| NAT8         | 2.89788 | 0.00065  | 0.007427 |
| LRIT3        | 2.8901  | 5.00E-05 | 0.000967 |
| LDLRAD4      | 2.88847 | 5.00E-05 | 0.000967 |
| ZC3HAV1      | 2.88678 | 5.00E-05 | 0.000967 |
| EPHA8        | 2.88128 | 0.0001   | 0.001745 |
| N4BP3        | 2.87916 | 5.00E-05 | 0.000967 |
| DHRS2        | 2.87848 | 5.00E-05 | 0.000967 |
| CNTD2        | 2.87737 | 5.00E-05 | 0.000967 |
| NFKBIZ       | 2.87621 | 5.00E-05 | 0.000967 |
| GPR84        | 2.87465 | 5.00E-05 | 0.000967 |
| GSTM2P1      | 2.87316 | 5.00E-05 | 0.000967 |
| SOCS1        | 2.87285 | 5.00E-05 | 0.000967 |
| TNFAIP3      | 2.86829 | 5.00E-05 | 0.000967 |
| NAV3         | 2.85706 | 5.00E-05 | 0.000967 |
| GPBAR1       | 2.85539 | 5.00E-05 | 0.000967 |
| GADL1        | 2.85417 | 5.00E-05 | 0.000967 |
| HMGCS1       | 2.84885 | 5.00E-05 | 0.000967 |
| CACNG1       | 2.84749 | 0.0001   | 0.001745 |
| PNLDC1       | 2.84646 | 5.00E-05 | 0.000967 |
| OIT3         | 2.84464 | 5.00E-05 | 0.000967 |
| S100A14      | 2.84011 | 5.00E-05 | 0.000967 |
| FAM71F2      | 2.83412 | 5.00E-05 | 0.000967 |
| ADCY4        | 2.83292 | 5.00E-05 | 0.000967 |
| IRF9         | 2.83041 | 5.00E-05 | 0.000967 |

|              |         |          |          |
|--------------|---------|----------|----------|
| LYST         | 2.8261  | 5.00E-05 | 0.000967 |
| CCRN4L       | 2.82286 | 5.00E-05 | 0.000967 |
| LAMB2P1      | 2.82214 | 5.00E-05 | 0.000967 |
| MYPN         | 2.81597 | 5.00E-05 | 0.000967 |
| IFNL4        | 2.79671 | 0.00065  | 0.007427 |
| LRRC10       | 2.79634 | 5.00E-05 | 0.000967 |
| MURC         | 2.78638 | 5.00E-05 | 0.000967 |
| DDIT3        | 2.78466 | 0.00045  | 0.005638 |
| DUSP10       | 2.78218 | 5.00E-05 | 0.000967 |
| RASL12       | 2.77725 | 0.00315  | 0.023852 |
| NPAS4        | 2.77609 | 0.00015  | 0.002431 |
| IMPG2        | 2.77474 | 5.00E-05 | 0.000967 |
| TBR1         | 2.76613 | 5.00E-05 | 0.000967 |
| PARD6G-AS1   | 2.76479 | 0.00795  | 0.046985 |
| RNF183       | 2.76063 | 5.00E-05 | 0.000967 |
| TAS2R9       | 2.7602  | 5.00E-05 | 0.000967 |
| CPT1C        | 2.75995 | 5.00E-05 | 0.000967 |
| LRRC15       | 2.75902 | 5.00E-05 | 0.000967 |
| GBP5         | 2.75849 | 5.00E-05 | 0.000967 |
| MXD1         | 2.75752 | 5.00E-05 | 0.000967 |
| SOD2         | 2.74126 | 5.00E-05 | 0.000967 |
| ZEB2         | 2.73516 | 5.00E-05 | 0.000967 |
| IRGC         | 2.73484 | 5.00E-05 | 0.000967 |
| C6orf58      | 2.72753 | 0.0002   | 0.003062 |
| LOC100507217 | 2.72481 | 5.00E-05 | 0.000967 |
| ARHGAP40     | 2.72453 | 0.0001   | 0.001745 |
| PLSCR2       | 2.72437 | 5.00E-05 | 0.000967 |
| PCDH12       | 2.72329 | 5.00E-05 | 0.000967 |
| GTF2IRD2     | 2.72105 | 5.00E-05 | 0.000967 |
| PROZ         | 2.71604 | 5.00E-05 | 0.000967 |
| B3GNT4       | 2.71518 | 5.00E-05 | 0.000967 |
| CYP2G1P      | 2.70755 | 5.00E-05 | 0.000967 |
| ZSCAN12P1    | 2.70728 | 5.00E-05 | 0.000967 |
| GAS2L2       | 2.7047  | 5.00E-05 | 0.000967 |
| EFNA2        | 2.70438 | 5.00E-05 | 0.000967 |
| WFDC5        | 2.70136 | 0.00115  | 0.011454 |
| ZNF382       | 2.69468 | 5.00E-05 | 0.000967 |
| CELP         | 2.69317 | 0.0056   | 0.036355 |
| ABAT         | 2.69032 | 5.00E-05 | 0.000967 |
| NR4A3        | 2.68986 | 5.00E-05 | 0.000967 |
| TMEM95       | 2.68519 | 5.00E-05 | 0.000967 |
| FBXW12       | 2.67842 | 0.00075  | 0.008257 |
| ALDOB        | 2.6775  | 5.00E-05 | 0.000967 |
| H1FNT        | 2.67662 | 0.00085  | 0.009052 |
| CATSPERD     | 2.67432 | 5.00E-05 | 0.000967 |
| AOX1         | 2.67247 | 5.00E-05 | 0.000967 |
| ARL10        | 2.66889 | 5.00E-05 | 0.000967 |
| TREM2        | 2.66642 | 0.00175  | 0.015698 |
| NRN1L        | 2.66523 | 0.00275  | 0.021673 |

|              |         |          |          |
|--------------|---------|----------|----------|
| ICAM1        | 2.66468 | 5.00E-05 | 0.000967 |
| TAS2R7       | 2.66416 | 0.0001   | 0.001745 |
| GYPE         | 2.66331 | 0.00035  | 0.004678 |
| AADAC        | 2.65933 | 5.00E-05 | 0.000967 |
| P2RY4        | 2.65755 | 0.0019   | 0.016639 |
| SFTPA1       | 2.65231 | 5.00E-05 | 0.000967 |
| TRIM54       | 2.65229 | 0.0003   | 0.004153 |
| CTNNAL1      | 2.646   | 5.00E-05 | 0.000967 |
| TBC1D29      | 2.63835 | 0.0008   | 0.008653 |
| UPK1A        | 2.63736 | 0.00465  | 0.031738 |
| S100A5       | 2.63503 | 5.00E-05 | 0.000967 |
| SLCO1C1      | 2.63467 | 5.00E-05 | 0.000967 |
| IFI6         | 2.63449 | 5.00E-05 | 0.000967 |
| PPP1R15A     | 2.62734 | 5.00E-05 | 0.000967 |
| N4BP2L1      | 2.62005 | 5.00E-05 | 0.000967 |
| RELB         | 2.61828 | 5.00E-05 | 0.000967 |
| LYPD3        | 2.61768 | 5.00E-05 | 0.000967 |
| TLX2         | 2.61637 | 5.00E-05 | 0.000967 |
| MYF6         | 2.61569 | 0.00335  | 0.024946 |
| LINC00152    | 2.61465 | 5.00E-05 | 0.000967 |
| GPR1         | 2.61381 | 5.00E-05 | 0.000967 |
| HIST4H4      | 2.61201 | 5.00E-05 | 0.000967 |
| BHLHE40-AS1  | 2.60794 | 0.0004   | 0.005167 |
| BIRC3        | 2.60749 | 5.00E-05 | 0.000967 |
| OVGP1        | 2.5984  | 5.00E-05 | 0.000967 |
| PYGM         | 2.59554 | 5.00E-05 | 0.000967 |
| MMRN2        | 2.59349 | 5.00E-05 | 0.000967 |
| CHRM1        | 2.59309 | 5.00E-05 | 0.000967 |
| LOC100287846 | 2.58963 | 5.00E-05 | 0.000967 |
| TEX13B       | 2.58367 | 0.0033   | 0.024673 |
| C5orf27      | 2.58206 | 5.00E-05 | 0.000967 |
| FANK1        | 2.57982 | 5.00E-05 | 0.000967 |
| ADIRF        | 2.57144 | 0.00025  | 0.003659 |
| PLA1A        | 2.56318 | 0.00075  | 0.008257 |
| WNT8A        | 2.54946 | 0.006    | 0.038323 |
| PPP1R1C      | 2.54867 | 5.00E-05 | 0.000967 |
| ANKRD34B     | 2.54436 | 5.00E-05 | 0.000967 |
| TAC3         | 2.5439  | 0.0007   | 0.007858 |
| FAM151B      | 2.54352 | 5.00E-05 | 0.000967 |
| NHLH1        | 2.54113 | 5.00E-05 | 0.000967 |
| FAM163A      | 2.53771 | 5.00E-05 | 0.000967 |
| IFI16        | 2.5364  | 5.00E-05 | 0.000967 |
| CYP2A6       | 2.53548 | 5.00E-05 | 0.000967 |
| ITGA9        | 2.53014 | 5.00E-05 | 0.000967 |
| LOC153910    | 2.52596 | 5.00E-05 | 0.000967 |
| SOX30        | 2.52297 | 0.00015  | 0.002431 |
| PPP4R4       | 2.51886 | 0.00015  | 0.002431 |
| SBSN         | 2.51319 | 5.00E-05 | 0.000967 |
| HIST1H2BF    | 2.50998 | 5.00E-05 | 0.000967 |

|              |         |          |          |
|--------------|---------|----------|----------|
| IL31RA       | 2.50977 | 5.00E-05 | 0.000967 |
| ASB15        | 2.50905 | 5.00E-05 | 0.000967 |
| CDKL4        | 2.50855 | 0.0002   | 0.003062 |
| IL18RAP      | 2.5074  | 0.0001   | 0.001745 |
| TEX35        | 2.50574 | 5.00E-05 | 0.000967 |
| DAPP1        | 2.50571 | 5.00E-05 | 0.000967 |
| PDE11A       | 2.50447 | 5.00E-05 | 0.000967 |
| ACSM1        | 2.50406 | 0.00365  | 0.026607 |
| SCN3A        | 2.50131 | 5.00E-05 | 0.000967 |
| SLC39A2      | 2.49694 | 5.00E-05 | 0.000967 |
| SHD          | 2.4945  | 5.00E-05 | 0.000967 |
| PHLDA1       | 2.48433 | 5.00E-05 | 0.000967 |
| CD83         | 2.48303 | 5.00E-05 | 0.000967 |
| NIM1         | 2.48267 | 5.00E-05 | 0.000967 |
| CLEC3B       | 2.47455 | 0.00625  | 0.03948  |
| GJB4         | 2.4745  | 5.00E-05 | 0.000967 |
| MIMT1        | 2.47013 | 0.0039   | 0.027879 |
| GPR176       | 2.46749 | 5.00E-05 | 0.000967 |
| HERC4        | 2.46558 | 5.00E-05 | 0.000967 |
| SLC8A2       | 2.46461 | 5.00E-05 | 0.000967 |
| CCL20        | 2.46301 | 5.00E-05 | 0.000967 |
| LOC100130370 | 2.46125 | 0.00055  | 0.006573 |
| DCHS1        | 2.45984 | 5.00E-05 | 0.000967 |
| LOC100216546 | 2.45855 | 5.00E-05 | 0.000967 |
| RHCG         | 2.45823 | 5.00E-05 | 0.000967 |
| IL6ST        | 2.45323 | 5.00E-05 | 0.000967 |
| CMTM2        | 2.45218 | 5.00E-05 | 0.000967 |
| ZSCAN5B      | 2.4516  | 0.00025  | 0.003659 |
| SLC2A9       | 2.4509  | 5.00E-05 | 0.000967 |
| NEB          | 2.45069 | 5.00E-05 | 0.000967 |
| LINC00486    | 2.44799 | 0.0072   | 0.043687 |
| H2AFJ        | 2.44382 | 5.00E-05 | 0.000967 |
| UBL4B        | 2.44231 | 0.00265  | 0.021074 |
| TEKT2        | 2.43814 | 0.0005   | 0.006117 |
| FOSL1        | 2.43529 | 5.00E-05 | 0.000967 |
| APLF         | 2.4333  | 5.00E-05 | 0.000967 |
| C3orf35      | 2.43104 | 5.00E-05 | 0.000967 |
| SMLR1        | 2.43007 | 5.00E-05 | 0.000967 |
| OR2B2        | 2.42738 | 5.00E-05 | 0.000967 |
| ZSWIM4       | 2.42677 | 5.00E-05 | 0.000967 |
| F13B         | 2.42653 | 5.00E-05 | 0.000967 |
| TNNC2        | 2.42409 | 0.00065  | 0.007427 |
| SNAPC1       | 2.42308 | 5.00E-05 | 0.000967 |
| DQX1         | 2.41205 | 5.00E-05 | 0.000967 |
| RPRML        | 2.41195 | 5.00E-05 | 0.000967 |
| NR4A1        | 2.41092 | 5.00E-05 | 0.000967 |
| LOC100499194 | 2.40999 | 5.00E-05 | 0.000967 |
| IL13         | 2.40919 | 0.0001   | 0.001745 |
| ALDH8A1      | 2.40693 | 5.00E-05 | 0.000967 |



|              |         |          |          |
|--------------|---------|----------|----------|
| PARD6G       | 2.4067  | 5.00E-05 | 0.000967 |
| LRRIQ4       | 2.40603 | 0.00095  | 0.009766 |
| ADAM32       | 2.4037  | 5.00E-05 | 0.000967 |
| AOC4         | 2.40293 | 5.00E-05 | 0.000967 |
| CLEC18A      | 2.40238 | 5.00E-05 | 0.000967 |
| SLCO1B7      | 2.40236 | 5.00E-05 | 0.000967 |
| DDX60L       | 2.40008 | 5.00E-05 | 0.000967 |
| NPM2         | 2.39746 | 0.0083   | 0.048535 |
| CCDC62       | 2.39726 | 5.00E-05 | 0.000967 |
| ZNF610       | 2.39615 | 5.00E-05 | 0.000967 |
| DIRC1        | 2.3902  | 0.0001   | 0.001745 |
| CXCR4        | 2.38806 | 5.00E-05 | 0.000967 |
| OR7E91P      | 2.37578 | 0.0009   | 0.009427 |
| TEX29        | 2.37486 | 0.00815  | 0.047894 |
| NPC1L1       | 2.37395 | 5.00E-05 | 0.000967 |
| CYP2A7       | 2.36836 | 0.0005   | 0.006117 |
| FAM109B      | 2.36519 | 0.0001   | 0.001745 |
| LHFPL4       | 2.36263 | 5.00E-05 | 0.000967 |
| IQSEC3       | 2.36131 | 5.00E-05 | 0.000967 |
| PSD          | 2.35993 | 0.0038   | 0.027341 |
| NEDD4L       | 2.35969 | 5.00E-05 | 0.000967 |
| BEND4        | 2.35952 | 5.00E-05 | 0.000967 |
| GCAT         | 2.35883 | 5.00E-05 | 0.000967 |
| UNC5A        | 2.35485 | 0.00095  | 0.009766 |
| VWA3A        | 2.35383 | 0.00015  | 0.002431 |
| CLPS         | 2.35336 | 0.00115  | 0.011454 |
| CYP21A1P     | 2.35173 | 0.0001   | 0.001745 |
| PATL2        | 2.35119 | 0.00015  | 0.002431 |
| TRIM40       | 2.35016 | 0.0002   | 0.003062 |
| C7orf61      | 2.34591 | 0.0001   | 0.001745 |
| PCP4L1       | 2.34495 | 0.0012   | 0.011824 |
| SORBS1       | 2.34347 | 5.00E-05 | 0.000967 |
| IFNA1        | 2.34261 | 0.0013   | 0.01252  |
| RSPH4A       | 2.34071 | 5.00E-05 | 0.000967 |
| PTPRH        | 2.33552 | 5.00E-05 | 0.000967 |
| IFITM1       | 2.33359 | 0.0073   | 0.044132 |
| OLFML2B      | 2.33215 | 5.00E-05 | 0.000967 |
| IRF1         | 2.33121 | 5.00E-05 | 0.000967 |
| MAP2K3       | 2.32745 | 5.00E-05 | 0.000967 |
| IL11         | 2.32596 | 5.00E-05 | 0.000967 |
| CAV3         | 2.32135 | 5.00E-05 | 0.000967 |
| LOC100129924 | 2.31407 | 0.0002   | 0.003062 |
| RSPH6A       | 2.31349 | 5.00E-05 | 0.000967 |
| LOC100289187 | 2.30956 | 5.00E-05 | 0.000967 |
| NLGN3        | 2.30633 | 5.00E-05 | 0.000967 |
| HIST1H2AA    | 2.30607 | 0.0084   | 0.048965 |
| LOC339807    | 2.30471 | 5.00E-05 | 0.000967 |
| FGF23        | 2.30271 | 5.00E-05 | 0.000967 |
| SEMA3D       | 2.30115 | 5.00E-05 | 0.000967 |

|              |         |          |          |
|--------------|---------|----------|----------|
| SAMD9        | 2.29472 | 5.00E-05 | 0.000967 |
| HIST1H3D     | 2.29376 | 5.00E-05 | 0.000967 |
| MFSD2B       | 2.29275 | 5.00E-05 | 0.000967 |
| OR1J4        | 2.29163 | 0.0036   | 0.026323 |
| ALPK3        | 2.28375 | 5.00E-05 | 0.000967 |
| NODAL        | 2.28364 | 5.00E-05 | 0.000967 |
| PLSCR1       | 2.28192 | 5.00E-05 | 0.000967 |
| FOXD4L1      | 2.2811  | 5.00E-05 | 0.000967 |
| TBX10        | 2.27754 | 5.00E-05 | 0.000967 |
| LINC00565    | 2.277   | 0.00025  | 0.003659 |
| ART4         | 2.27666 | 0.00015  | 0.002431 |
| C17orf66     | 2.27518 | 5.00E-05 | 0.000967 |
| HLA-B        | 2.26921 | 5.00E-05 | 0.000967 |
| LINC00654    | 2.26905 | 0.00015  | 0.002431 |
| PDZD2        | 2.26678 | 5.00E-05 | 0.000967 |
| NKAPL        | 2.26578 | 5.00E-05 | 0.000967 |
| ITGA5        | 2.26387 | 5.00E-05 | 0.000967 |
| HELZ2        | 2.26379 | 5.00E-05 | 0.000967 |
| GPR32        | 2.26285 | 0.0077   | 0.046014 |
| ART1         | 2.26045 | 5.00E-05 | 0.000967 |
| INHBA        | 2.25972 | 5.00E-05 | 0.000967 |
| ERO1LB       | 2.25917 | 5.00E-05 | 0.000967 |
| PDLIM4       | 2.25848 | 0.0013   | 0.01252  |
| RNASE13      | 2.25846 | 0.00275  | 0.021673 |
| JMJD1C       | 2.25736 | 5.00E-05 | 0.000967 |
| LOC339166    | 2.25444 | 5.00E-05 | 0.000967 |
| FUT5         | 2.25162 | 0.0005   | 0.006117 |
| LTB          | 2.24993 | 0.00035  | 0.004678 |
| TIGIT        | 2.24898 | 5.00E-05 | 0.000967 |
| POU2F2       | 2.24817 | 5.00E-05 | 0.000967 |
| ADAM20P1     | 2.24678 | 0.0002   | 0.003062 |
| DNAH2        | 2.24657 | 5.00E-05 | 0.000967 |
| FREM2        | 2.24039 | 5.00E-05 | 0.000967 |
| C16orf46     | 2.23157 | 5.00E-05 | 0.000967 |
| SSUH2        | 2.23127 | 5.00E-05 | 0.000967 |
| ADAM20       | 2.23105 | 5.00E-05 | 0.000967 |
| KCND3        | 2.22928 | 0.00115  | 0.011454 |
| LINC00202-1  | 2.22886 | 5.00E-05 | 0.000967 |
| ACR          | 2.22798 | 0.0084   | 0.048965 |
| ESRRB        | 2.22241 | 5.00E-05 | 0.000967 |
| NFKBIE       | 2.22195 | 5.00E-05 | 0.000967 |
| GRK7         | 2.22123 | 5.00E-05 | 0.000967 |
| HRH1         | 2.21965 | 5.00E-05 | 0.000967 |
| SLC10A1      | 2.21698 | 5.00E-05 | 0.000967 |
| PTAFR        | 2.21583 | 5.00E-05 | 0.000967 |
| UBQLNL       | 2.21413 | 0.0003   | 0.004153 |
| WNT2B        | 2.21195 | 5.00E-05 | 0.000967 |
| LOC100505495 | 2.20492 | 5.00E-05 | 0.000967 |
| SLC7A9       | 2.20483 | 5.00E-05 | 0.000967 |

|            |         |          |          |
|------------|---------|----------|----------|
| LAMC2      | 2.20481 | 5.00E-05 | 0.000967 |
| UBE2U      | 2.20271 | 0.0067   | 0.041533 |
| LINC00641  | 2.20189 | 5.00E-05 | 0.000967 |
| ISG20      | 2.20131 | 5.00E-05 | 0.000967 |
| MYO1A      | 2.20002 | 5.00E-05 | 0.000967 |
| SPRED3     | 2.19734 | 5.00E-05 | 0.000967 |
| GRK4       | 2.19454 | 0.00015  | 0.002431 |
| LOC388942  | 2.191   | 5.00E-05 | 0.000967 |
| C8orf46    | 2.18921 | 5.00E-05 | 0.000967 |
| ZNF501     | 2.18619 | 0.0001   | 0.001745 |
| AKAP12     | 2.17973 | 5.00E-05 | 0.000967 |
| FGF18      | 2.1773  | 0.00025  | 0.003659 |
| PTGER4     | 2.17719 | 5.00E-05 | 0.000967 |
| SEMA7A     | 2.17429 | 5.00E-05 | 0.000967 |
| MRPL23-AS1 | 2.17395 | 5.00E-05 | 0.000967 |
| LOC440896  | 2.17149 | 5.00E-05 | 0.000967 |
| CORO2B     | 2.17098 | 5.00E-05 | 0.000967 |
| CSRNP1     | 2.17014 | 5.00E-05 | 0.000967 |
| BCAR4      | 2.16529 | 0.00055  | 0.006573 |
| SRD5A2     | 2.16364 | 0.00095  | 0.009766 |
| C7orf53    | 2.16249 | 5.00E-05 | 0.000967 |
| PYCARD     | 2.1614  | 5.00E-05 | 0.000967 |
| MPZL3      | 2.16088 | 5.00E-05 | 0.000967 |
| TRIM72     | 2.15779 | 0.0007   | 0.007858 |
| CHRN2      | 2.15282 | 5.00E-05 | 0.000967 |
| LDHAL6A    | 2.15257 | 5.00E-05 | 0.000967 |
| SLCO1A2    | 2.14748 | 5.00E-05 | 0.000967 |
| HIVEP2     | 2.14713 | 5.00E-05 | 0.000967 |
| NLRP9      | 2.1445  | 5.00E-05 | 0.000967 |
| NMRK2      | 2.14287 | 0.00125  | 0.012208 |
| LZTS1      | 2.14268 | 5.00E-05 | 0.000967 |
| GJC2       | 2.13892 | 5.00E-05 | 0.000967 |
| ACVR1C     | 2.13853 | 0.0001   | 0.001745 |
| PDZD9      | 2.13767 | 5.00E-05 | 0.000967 |
| NLRP7      | 2.13426 | 0.00015  | 0.002431 |
| SPAG9      | 2.13314 | 5.00E-05 | 0.000967 |
| HAS2       | 2.13268 | 5.00E-05 | 0.000967 |
| KLF6       | 2.13199 | 5.00E-05 | 0.000967 |
| B3GALNT2   | 2.12953 | 5.00E-05 | 0.000967 |
| APOE       | 2.12934 | 5.00E-05 | 0.000967 |
| MTNR1A     | 2.12886 | 5.00E-05 | 0.000967 |
| FAM154B    | 2.12861 | 5.00E-05 | 0.000967 |
| C2orf83    | 2.12625 | 5.00E-05 | 0.000967 |
| ACSBG1     | 2.12588 | 5.00E-05 | 0.000967 |
| SAMD7      | 2.1255  | 0.00295  | 0.022658 |
| UCN2       | 2.12469 | 5.00E-05 | 0.000967 |
| SLC22A14   | 2.1244  | 0.0007   | 0.007858 |
| RSPO1      | 2.12095 | 0.00015  | 0.002431 |
| NCF1B      | 2.12044 | 0.00205  | 0.017591 |

|              |         |          |          |
|--------------|---------|----------|----------|
| OSM          | 2.11952 | 5.00E-05 | 0.000967 |
| TLR9         | 2.11941 | 5.00E-05 | 0.000967 |
| PHLDA2       | 2.11781 | 5.00E-05 | 0.000967 |
| CYR61        | 2.11721 | 5.00E-05 | 0.000967 |
| SYT11        | 2.11602 | 5.00E-05 | 0.000967 |
| MCTP1        | 2.11475 | 5.00E-05 | 0.000967 |
| COL11A2      | 2.1146  | 0.0003   | 0.004153 |
| NEK10        | 2.11305 | 5.00E-05 | 0.000967 |
| FAM90A1      | 2.11043 | 0.00035  | 0.004678 |
| IL21R-AS1    | 2.11036 | 0.0003   | 0.004153 |
| ST3GAL6      | 2.10989 | 5.00E-05 | 0.000967 |
| CDO1         | 2.10754 | 0.00205  | 0.017591 |
| BATF2        | 2.10489 | 5.00E-05 | 0.000967 |
| TAS2R8       | 2.0953  | 0.00245  | 0.019913 |
| LOC100216545 | 2.09353 | 5.00E-05 | 0.000967 |
| POU3F4       | 2.09176 | 0.0006   | 0.007015 |
| OR1F1        | 2.08628 | 5.00E-05 | 0.000967 |
| PTPRN2       | 2.08571 | 0.0007   | 0.007858 |
| MAGEA8       | 2.08487 | 0.0001   | 0.001745 |
| SLC45A2      | 2.08454 | 0.00055  | 0.006573 |
| FOXD4L6      | 2.07969 | 5.00E-05 | 0.000967 |
| CDKL3        | 2.07961 | 5.00E-05 | 0.000967 |
| GPR61        | 2.07777 | 0.0001   | 0.001745 |
| MCL1         | 2.07401 | 5.00E-05 | 0.000967 |
| TSPO2        | 2.07078 | 0.00045  | 0.005638 |
| LOC339894    | 2.0701  | 0.0004   | 0.005167 |
| OAS1         | 2.06867 | 5.00E-05 | 0.000967 |
| CILP         | 2.0674  | 5.00E-05 | 0.000967 |
| PLBD1        | 2.06539 | 0.0001   | 0.001745 |
| PARP9        | 2.06406 | 0.00665  | 0.041284 |
| CELF6        | 2.06203 | 5.00E-05 | 0.000967 |
| PFKFB4       | 2.06131 | 5.00E-05 | 0.000967 |
| CLEC18C      | 2.0593  | 0.00265  | 0.021074 |
| SPTSSB       | 2.05786 | 0.0003   | 0.004153 |
| TNFAIP6      | 2.05772 | 0.0085   | 0.04934  |
| RSPH10B2     | 2.05663 | 5.00E-05 | 0.000967 |
| S100A2       | 2.05613 | 5.00E-05 | 0.000967 |
| C2orf27B     | 2.05529 | 0.0047   | 0.031987 |
| RDH12        | 2.05508 | 0.00015  | 0.002431 |
| LOC285627    | 2.05285 | 5.00E-05 | 0.000967 |
| PLA2G3       | 2.05272 | 0.00175  | 0.015698 |
| PINLYP       | 2.05231 | 0.0004   | 0.005167 |
| FOXD4L5      | 2.04942 | 5.00E-05 | 0.000967 |
| GTF2IRD2B    | 2.04732 | 5.00E-05 | 0.000967 |
| CHD2         | 2.04513 | 5.00E-05 | 0.000967 |
| CEACAM20     | 2.04479 | 0.00175  | 0.015698 |
| IFI44L       | 2.0444  | 5.00E-05 | 0.000967 |
| NR1D1        | 2.04357 | 0.00025  | 0.003659 |
| C2orf61      | 2.04302 | 5.00E-05 | 0.000967 |

|              |         |          |          |
|--------------|---------|----------|----------|
| MYLK2        | 2.04081 | 5.00E-05 | 0.000967 |
| SLC25A34     | 2.04004 | 5.00E-05 | 0.000967 |
| LINC00622    | 2.03941 | 0.00135  | 0.012838 |
| C7orf63      | 2.03892 | 5.00E-05 | 0.000967 |
| RRH          | 2.03219 | 0.0041   | 0.028947 |
| CSF3         | 2.02984 | 5.00E-05 | 0.000967 |
| RAPSN        | 2.02861 | 5.00E-05 | 0.000967 |
| NFKB1        | 2.02855 | 5.00E-05 | 0.000967 |
| ZNF80        | 2.02645 | 5.00E-05 | 0.000967 |
| HCAR3        | 2.02166 | 5.00E-05 | 0.000967 |
| CSF2         | 2.01884 | 0.00865  | 0.049984 |
| ETS1         | 2.01587 | 5.00E-05 | 0.000967 |
| OAS3         | 2.01535 | 5.00E-05 | 0.000967 |
| NCOR1P1      | 2.01378 | 0.00245  | 0.019913 |
| LRRC66       | 2.01164 | 5.00E-05 | 0.000967 |
| GALNT3       | 2.0115  | 0.0004   | 0.005167 |
| ARC          | 2.01094 | 5.00E-05 | 0.000967 |
| LOC100862671 | 2.00839 | 5.00E-05 | 0.000967 |
| SNCG         | 2.00833 | 0.00015  | 0.002431 |
| LINC00162    | 2.00771 | 0.00675  | 0.041733 |
| FSCN3        | 2.0052  | 0.0002   | 0.003062 |
| ISLR         | 2.00421 | 5.00E-05 | 0.000967 |
| GUCA1B       | 2.00346 | 5.00E-05 | 0.000967 |
| ADIG         | 2.00243 | 0.00695  | 0.04259  |
| KIAA1549L    | 2.00138 | 5.00E-05 | 0.000967 |
| GRIA4        | 2.00022 | 5.00E-05 | 0.000967 |
| AVPR2        | 1.99744 | 0.0013   | 0.01252  |
| LOC339666    | 1.99668 | 5.00E-05 | 0.000967 |
| ACTL7A       | 1.99628 | 0.00105  | 0.010623 |
| HLA-E        | 1.99587 | 5.00E-05 | 0.000967 |
| DUSP6        | 1.99509 | 5.00E-05 | 0.000967 |
| FRZB         | 1.99206 | 0.0003   | 0.004153 |
| RPL21P44     | 1.99161 | 5.00E-05 | 0.000967 |
| LOC646498    | 1.99083 | 0.00685  | 0.042163 |
| LINC00672    | 1.98944 | 5.00E-05 | 0.000967 |
| CILP2        | 1.98809 | 5.00E-05 | 0.000967 |
| NMNAT2       | 1.98637 | 5.00E-05 | 0.000967 |
| SERTAD1      | 1.98525 | 5.00E-05 | 0.000967 |
| GPR3         | 1.98299 | 5.00E-05 | 0.000967 |
| LAMP5        | 1.97685 | 0.00045  | 0.005638 |
| ACRBP        | 1.97424 | 5.00E-05 | 0.000967 |
| HERC6        | 1.97148 | 5.00E-05 | 0.000967 |
| APOBEC3B     | 1.9707  | 5.00E-05 | 0.000967 |
| STARD13      | 1.97012 | 5.00E-05 | 0.000967 |
| PRDM7        | 1.96992 | 5.00E-05 | 0.000967 |
| TFPI         | 1.96987 | 5.00E-05 | 0.000967 |
| GUCA1A       | 1.96697 | 0.00095  | 0.009766 |
| PRKACG       | 1.96692 | 0.00225  | 0.01885  |
| LINC00854    | 1.96416 | 5.00E-05 | 0.000967 |

|              |         |          |          |
|--------------|---------|----------|----------|
| KCNN2        | 1.96395 | 5.00E-05 | 0.000967 |
| GUCY2D       | 1.9575  | 0.00035  | 0.004678 |
| BEST2        | 1.95582 | 0.0026   | 0.020846 |
| EXOC3L2      | 1.95543 | 5.00E-05 | 0.000967 |
| APOL3        | 1.95447 | 0.00045  | 0.005638 |
| HRH3         | 1.95408 | 0.0003   | 0.004153 |
| DUSP15       | 1.9456  | 0.0012   | 0.011824 |
| FOXD4L3      | 1.94327 | 0.0001   | 0.001745 |
| PLCB4        | 1.94309 | 5.00E-05 | 0.000967 |
| LOC100129722 | 1.94258 | 0.00105  | 0.010623 |
| CCDC19       | 1.9405  | 0.00015  | 0.002431 |
| RNF223       | 1.94049 | 0.00635  | 0.03999  |
| PTGS2        | 1.93826 | 5.00E-05 | 0.000967 |
| LOC100506136 | 1.93621 | 5.00E-05 | 0.000967 |
| GPBP1        | 1.93315 | 5.00E-05 | 0.000967 |
| DNAH1        | 1.93178 | 5.00E-05 | 0.000967 |
| HIST2H2BC    | 1.92959 | 5.00E-05 | 0.000967 |
| HAPLN2       | 1.92818 | 0.0002   | 0.003062 |
| SLC30A7      | 1.92741 | 5.00E-05 | 0.000967 |
| RSRC2        | 1.9264  | 5.00E-05 | 0.000967 |
| POU5F1P3     | 1.92586 | 0.00635  | 0.03999  |
| PER1         | 1.92501 | 5.00E-05 | 0.000967 |
| NUAK2        | 1.92487 | 5.00E-05 | 0.000967 |
| ARID4B       | 1.92424 | 5.00E-05 | 0.000967 |
| HIST1H4E     | 1.92257 | 5.00E-05 | 0.000967 |
| FAM46C       | 1.91907 | 5.00E-05 | 0.000967 |
| HSPH1        | 1.91886 | 5.00E-05 | 0.000967 |
| TOP1         | 1.91766 | 5.00E-05 | 0.000967 |
| CPM          | 1.91313 | 5.00E-05 | 0.000967 |
| IER2         | 1.90993 | 5.00E-05 | 0.000967 |
| TTC9B        | 1.90916 | 0.0019   | 0.016639 |
| DEF6         | 1.90906 | 0.0051   | 0.033918 |
| CRTAM        | 1.90784 | 0.0001   | 0.001745 |
| TREML1       | 1.90511 | 0.00195  | 0.016979 |
| MTVR2        | 1.90112 | 5.00E-05 | 0.000967 |
| NLRC4        | 1.90056 | 0.0001   | 0.001745 |
| UBASH3A      | 1.89848 | 0.00135  | 0.012838 |
| NFKBIB       | 1.89763 | 5.00E-05 | 0.000967 |
| MEG8         | 1.89675 | 0.00285  | 0.022187 |
| GHSR         | 1.8966  | 0.00325  | 0.024387 |
| KCNH7        | 1.89649 | 0.00055  | 0.006573 |
| ARL5B        | 1.89341 | 5.00E-05 | 0.000967 |
| LOC554223    | 1.89145 | 0.0076   | 0.045548 |
| LEAP2        | 1.89031 | 5.00E-05 | 0.000967 |
| LOC100271702 | 1.89021 | 0.0025   | 0.02025  |
| C12orf70     | 1.88939 | 0.0057   | 0.036875 |
| C4A,C4B_2    | 1.88933 | 0.0039   | 0.027879 |
| IRS4         | 1.888   | 0.0011   | 0.011035 |
| KIAA0825     | 1.88427 | 0.0001   | 0.001745 |

|              |         |          |          |
|--------------|---------|----------|----------|
| OR2H2        | 1.8818  | 0.0068   | 0.041918 |
| BCL2A1       | 1.88146 | 5.00E-05 | 0.000967 |
| H3F3B        | 1.88127 | 5.00E-05 | 0.000967 |
| CLEC18B      | 1.8804  | 0.00165  | 0.015053 |
| NPR2         | 1.87871 | 5.00E-05 | 0.000967 |
| HDX          | 1.87633 | 5.00E-05 | 0.000967 |
| IL21R        | 1.87576 | 0.0028   | 0.021921 |
| SLC9C1       | 1.87454 | 0.0015   | 0.013976 |
| PAX6         | 1.87299 | 5.00E-05 | 0.000967 |
| PGM5         | 1.87047 | 0.00075  | 0.008257 |
| UCMA         | 1.86943 | 0.00335  | 0.024946 |
| PTPRE        | 1.86839 | 0.00035  | 0.004678 |
| COL12A1      | 1.86668 | 5.00E-05 | 0.000967 |
| NFKB2        | 1.86656 | 5.00E-05 | 0.000967 |
| ZSCAN10      | 1.86539 | 0.0012   | 0.011824 |
| CKM          | 1.8652  | 0.00135  | 0.012838 |
| CTRB1        | 1.86516 | 0.0058   | 0.037289 |
| VGf          | 1.86495 | 5.00E-05 | 0.000967 |
| LOC100506305 | 1.86261 | 5.00E-05 | 0.000967 |
| AZ12         | 1.86107 | 5.00E-05 | 0.000967 |
| ANKDD1B      | 1.85986 | 0.00085  | 0.009052 |
| AOC2         | 1.85915 | 5.00E-05 | 0.000967 |
| HTR2A        | 1.85863 | 0.0003   | 0.004153 |
| NXPH3        | 1.8554  | 5.00E-05 | 0.000967 |
| NFE2L3       | 1.85469 | 5.00E-05 | 0.000967 |
| KPNA7        | 1.8546  | 5.00E-05 | 0.000967 |
| GADD45A      | 1.85426 | 5.00E-05 | 0.000967 |
| ASB2         | 1.8541  | 0.0004   | 0.005167 |
| RASD1        | 1.84893 | 5.00E-05 | 0.000967 |
| GRM2         | 1.84796 | 0.0013   | 0.01252  |
| CCNL1        | 1.84595 | 5.00E-05 | 0.000967 |
| MTHFD2L      | 1.84529 | 0.00025  | 0.003659 |
| DNAH17       | 1.84404 | 0.0033   | 0.024673 |
| DLL4         | 1.8438  | 0.0001   | 0.001745 |
| DNAJB5       | 1.84311 | 5.00E-05 | 0.000967 |
| ABL2         | 1.84251 | 5.00E-05 | 0.000967 |
| SOST         | 1.84205 | 0.0014   | 0.013185 |
| SPRY2        | 1.8416  | 5.00E-05 | 0.000967 |
| TAS2R42      | 1.84064 | 0.0029   | 0.022408 |
| TTC21A       | 1.8399  | 5.00E-05 | 0.000967 |
| MPP4         | 1.83794 | 0.00035  | 0.004678 |
| CPLX3        | 1.8348  | 0.00245  | 0.019913 |
| LHX3         | 1.83376 | 0.0015   | 0.013976 |
| MAP3K19      | 1.83324 | 0.00265  | 0.021074 |
| ANXA5        | 1.83314 | 5.00E-05 | 0.000967 |
| CD226        | 1.83083 | 0.0003   | 0.004153 |
| HIST1H4H     | 1.83058 | 5.00E-05 | 0.000967 |
| XIRP1        | 1.83005 | 0.00045  | 0.005638 |
| WDR66        | 1.82924 | 5.00E-05 | 0.000967 |

|            |         |          |          |
|------------|---------|----------|----------|
| CRISPLD2   | 1.82805 | 0.0001   | 0.001745 |
| RUNX1      | 1.82595 | 5.00E-05 | 0.000967 |
| TGIF2      | 1.82535 | 0.0073   | 0.044132 |
| WDR96      | 1.82393 | 0.0003   | 0.004153 |
| PTH1R      | 1.82225 | 0.00095  | 0.009766 |
| TAS2R5     | 1.82193 | 5.00E-05 | 0.000967 |
| MARK2P9    | 1.8209  | 0.0008   | 0.008653 |
| LINC00483  | 1.82018 | 5.00E-05 | 0.000967 |
| HAVCR2     | 1.81707 | 0.0004   | 0.005167 |
| THOC6      | 1.81703 | 0.0001   | 0.001745 |
| FAAH       | 1.81583 | 0.0009   | 0.009427 |
| GTF2IRD2P1 | 1.81472 | 5.00E-05 | 0.000967 |
| LINC00624  | 1.81315 | 0.00065  | 0.007427 |
| SYNE1      | 1.81312 | 5.00E-05 | 0.000967 |
| LOC646862  | 1.81153 | 0.00035  | 0.004678 |
| NFKBIA     | 1.81012 | 5.00E-05 | 0.000967 |
| CNTN2      | 1.80974 | 5.00E-05 | 0.000967 |
| PKI55      | 1.80909 | 5.00E-05 | 0.000967 |
| TSPYL2     | 1.80849 | 5.00E-05 | 0.000967 |
| CNN1       | 1.80567 | 0.002    | 0.017269 |
| LATS2      | 1.80539 | 5.00E-05 | 0.000967 |
| GUSBP5     | 1.80213 | 0.00065  | 0.007427 |
| RASGRP2    | 1.80181 | 0.0005   | 0.006117 |
| ANKRD10    | 1.80074 | 5.00E-05 | 0.000967 |
| ZFP36      | 1.79921 | 5.00E-05 | 0.000967 |
| FLJ33581   | 1.79817 | 0.0028   | 0.021921 |
| ST7L       | 1.79721 | 5.00E-05 | 0.000967 |
| SLC25A2    | 1.79712 | 0.0002   | 0.003062 |
| LAMB3      | 1.79565 | 5.00E-05 | 0.000967 |
| TAAR3      | 1.79464 | 0.0068   | 0.041918 |
| ICAM4      | 1.79362 | 0.00025  | 0.003659 |
| CALHM1     | 1.79248 | 5.00E-05 | 0.000967 |
| GPR179     | 1.79095 | 5.00E-05 | 0.000967 |
| PCF11      | 1.78944 | 5.00E-05 | 0.000967 |
| SKAP1      | 1.78904 | 0.0023   | 0.019134 |
| ATP2B2     | 1.78582 | 0.0001   | 0.001745 |
| LRRC4B     | 1.78325 | 5.00E-05 | 0.000967 |
| SEMA6A     | 1.78087 | 5.00E-05 | 0.000967 |
| LOC643669  | 1.77901 | 5.00E-05 | 0.000967 |
| ROPN1L     | 1.77791 | 0.00075  | 0.008257 |
| LPAR5      | 1.7755  | 0.00055  | 0.006573 |
| WDR26      | 1.77395 | 5.00E-05 | 0.000967 |
| MFRP       | 1.77247 | 0.0002   | 0.003062 |
| PODXL      | 1.77157 | 5.00E-05 | 0.000967 |
| SNX29P2    | 1.77067 | 0.0002   | 0.003062 |
| PARP8      | 1.77036 | 0.00015  | 0.002431 |
| C16orf90   | 1.77011 | 0.00135  | 0.012838 |
| KLF10      | 1.76994 | 5.00E-05 | 0.000967 |
| TEX14      | 1.76906 | 0.0001   | 0.001745 |



|              |         |          |          |
|--------------|---------|----------|----------|
| GALR2        | 1.76696 | 0.0003   | 0.004153 |
| TBC1D28      | 1.76565 | 0.00535  | 0.035214 |
| CYP2E1       | 1.76556 | 0.0032   | 0.024153 |
| PDE2A        | 1.76408 | 0.0001   | 0.001745 |
| H3F3C        | 1.76378 | 5.00E-05 | 0.000967 |
| CREBRF       | 1.76355 | 0.00025  | 0.003659 |
| LINC00346    | 1.7627  | 5.00E-05 | 0.000967 |
| TOP1P1       | 1.7627  | 5.00E-05 | 0.000967 |
| FAM180B      | 1.75928 | 0.00035  | 0.004678 |
| CLDN6        | 1.75924 | 0.00095  | 0.009766 |
| ABCC11       | 1.75591 | 0.0002   | 0.003062 |
| HCAR2        | 1.75571 | 0.0002   | 0.003062 |
| TMEM198      | 1.75548 | 0.0002   | 0.003062 |
| CDR1         | 1.75462 | 0.00025  | 0.003659 |
| FOXD4L2      | 1.75408 | 5.00E-05 | 0.000967 |
| KLHL41       | 1.75406 | 0.0004   | 0.005167 |
| RSPRY1       | 1.75335 | 5.00E-05 | 0.000967 |
| PARP14       | 1.75145 | 5.00E-05 | 0.000967 |
| FST          | 1.75036 | 5.00E-05 | 0.000967 |
| MUC20        | 1.74986 | 5.00E-05 | 0.000967 |
| LOC100507489 | 1.74953 | 0.00415  | 0.029152 |
| KLHL4        | 1.74894 | 5.00E-05 | 0.000967 |
| TMEM151B     | 1.74775 | 0.0003   | 0.004153 |
| XRN1         | 1.74482 | 5.00E-05 | 0.000967 |
| ALMS1P       | 1.74479 | 0.00505  | 0.033693 |
| RIOK3        | 1.74376 | 5.00E-05 | 0.000967 |
| CXCL1        | 1.7426  | 5.00E-05 | 0.000967 |
| DLX2         | 1.7411  | 0.00015  | 0.002431 |
| EEA1         | 1.74057 | 5.00E-05 | 0.000967 |
| OR52W1       | 1.73923 | 0.00675  | 0.041733 |
| MAP1LC3B     | 1.73669 | 0.00015  | 0.002431 |
| XDH          | 1.73488 | 5.00E-05 | 0.000967 |
| H1FO         | 1.73467 | 5.00E-05 | 0.000967 |
| SCN5A        | 1.73393 | 0.0001   | 0.001745 |
| CCDC17       | 1.73191 | 5.00E-05 | 0.000967 |
| CFP          | 1.73079 | 0.0004   | 0.005167 |
| TRA2A        | 1.72883 | 5.00E-05 | 0.000967 |
| KCNQ3        | 1.72705 | 0.0001   | 0.001745 |
| SFRP5        | 1.72627 | 0.0001   | 0.001745 |
| NRADDP       | 1.72404 | 0.00085  | 0.009052 |
| SBSPON       | 1.72293 | 0.00015  | 0.002431 |
| DCAF4L1      | 1.71954 | 5.00E-05 | 0.000967 |
| ELL2         | 1.71877 | 5.00E-05 | 0.000967 |
| PRAM1        | 1.71707 | 0.0034   | 0.025194 |
| THAP1        | 1.71697 | 5.00E-05 | 0.000967 |
| SEC24A       | 1.71508 | 5.00E-05 | 0.000967 |
| FABP2        | 1.71413 | 0.001    | 0.010186 |
| C22orf34     | 1.71197 | 0.0032   | 0.024153 |
| MAATS1       | 1.71123 | 0.00325  | 0.024387 |

|              |         |          |          |
|--------------|---------|----------|----------|
| FRMD6        | 1.71072 | 5.00E-05 | 0.000967 |
| ZNF474       | 1.71055 | 0.0001   | 0.001745 |
| NFAT5        | 1.71002 | 5.00E-05 | 0.000967 |
| TMEM163      | 1.70836 | 0.001    | 0.010186 |
| RYR1         | 1.70692 | 5.00E-05 | 0.000967 |
| FAM117A      | 1.70617 | 5.00E-05 | 0.000967 |
| TRPC5        | 1.70443 | 0.0005   | 0.006117 |
| LRGUK        | 1.70382 | 0.00055  | 0.006573 |
| REM2         | 1.70358 | 5.00E-05 | 0.000967 |
| LOC100288181 | 1.70208 | 0.0001   | 0.001745 |
| CYP1A1       | 1.70183 | 5.00E-05 | 0.000967 |
| PGPEP1L      | 1.69932 | 0.00395  | 0.028152 |
| MICALCL      | 1.69858 | 0.00055  | 0.006573 |
| CDKN1C       | 1.69805 | 0.00235  | 0.019365 |
| CHRNA10      | 1.69796 | 5.00E-05 | 0.000967 |
| USP53        | 1.69779 | 5.00E-05 | 0.000967 |
| ZCCHC6       | 1.69757 | 5.00E-05 | 0.000967 |
| APOF         | 1.69709 | 0.00045  | 0.005638 |
| ADAM12       | 1.69576 | 0.00015  | 0.002431 |
| NAALAD2      | 1.69391 | 5.00E-05 | 0.000967 |
| SDCBP        | 1.69356 | 5.00E-05 | 0.000967 |
| CXorf36      | 1.69339 | 0.0002   | 0.003062 |
| SHISA4       | 1.69328 | 5.00E-05 | 0.000967 |
| LOC339593    | 1.69301 | 0.0042   | 0.029379 |
| IGF2BP2      | 1.69155 | 5.00E-05 | 0.000967 |
| SERPINA10    | 1.69028 | 0.0005   | 0.006117 |
| ACTN3        | 1.68753 | 0.00045  | 0.005638 |
| HIST1H4J     | 1.6875  | 0.00025  | 0.003659 |
| PARP12       | 1.68725 | 5.00E-05 | 0.000967 |
| HIST1H4K     | 1.68585 | 0.0001   | 0.001745 |
| ATCAY        | 1.68477 | 5.00E-05 | 0.000967 |
| LOC541471    | 1.6842  | 5.00E-05 | 0.000967 |
| TRIM55       | 1.68362 | 0.0029   | 0.022408 |
| FAM133DP     | 1.68345 | 0.0003   | 0.004153 |
| ZNFX1        | 1.68339 | 5.00E-05 | 0.000967 |
| LINC00163    | 1.68262 | 0.00065  | 0.007427 |
| DUSP5        | 1.68253 | 5.00E-05 | 0.000967 |
| BCL2L12      | 1.68137 | 0.00235  | 0.019365 |
| CLDN24       | 1.68025 | 0.0003   | 0.004153 |
| TBX6         | 1.68011 | 0.00165  | 0.015053 |
| GDF9         | 1.68004 | 0.0002   | 0.003062 |
| NPTX1        | 1.6795  | 5.00E-05 | 0.000967 |
| HIST1H4C     | 1.6781  | 5.00E-05 | 0.000967 |
| DDAH2        | 1.67773 | 5.00E-05 | 0.000967 |
| TNFSF14      | 1.67762 | 0.00015  | 0.002431 |
| EIF2AK2      | 1.67691 | 5.00E-05 | 0.000967 |
| INPP1        | 1.67648 | 5.00E-05 | 0.000967 |
| FAM46B       | 1.67603 | 5.00E-05 | 0.000967 |
| SYNJ1        | 1.67462 | 5.00E-05 | 0.000967 |

|              |         |          |          |
|--------------|---------|----------|----------|
| ETV7         | 1.67397 | 0.0008   | 0.008653 |
| PPM1K        | 1.67366 | 5.00E-05 | 0.000967 |
| LOC100128288 | 1.67357 | 5.00E-05 | 0.000967 |
| TAS2R4       | 1.67274 | 5.00E-05 | 0.000967 |
| TKTL1        | 1.67219 | 0.0017   | 0.015408 |
| DAW1         | 1.67056 | 0.00345  | 0.025496 |
| GPM6B        | 1.66856 | 0.0004   | 0.005167 |
| NME5         | 1.66789 | 0.0058   | 0.037289 |
| REL          | 1.66625 | 5.00E-05 | 0.000967 |
| BST1         | 1.66587 | 5.00E-05 | 0.000967 |
| LAMTOR3      | 1.6644  | 0.0001   | 0.001745 |
| SEMA3A       | 1.66439 | 5.00E-05 | 0.000967 |
| RPL13AP20    | 1.66206 | 0.00015  | 0.002431 |
| IFFO1        | 1.66061 | 5.00E-05 | 0.000967 |
| RFTN2        | 1.65937 | 5.00E-05 | 0.000967 |
| CD160        | 1.65661 | 0.0001   | 0.001745 |
| LOC401242    | 1.65645 | 0.00085  | 0.009052 |
| FNIP1        | 1.65009 | 5.00E-05 | 0.000967 |
| GNG4         | 1.65008 | 0.0001   | 0.001745 |
| GRHL2        | 1.64879 | 0.00085  | 0.009052 |
| STX3         | 1.6484  | 5.00E-05 | 0.000967 |
| CLK1         | 1.64731 | 5.00E-05 | 0.000967 |
| NCOA7        | 1.64662 | 5.00E-05 | 0.000967 |
| POU1F1       | 1.64405 | 0.0019   | 0.016639 |
| CA13         | 1.64166 | 5.00E-05 | 0.000967 |
| EPGN         | 1.64035 | 0.0002   | 0.003062 |
| PIWIL2       | 1.63685 | 0.0001   | 0.001745 |
| SLC22A13     | 1.63646 | 0.0003   | 0.004153 |
| C19orf38     | 1.63631 | 0.00535  | 0.035214 |
| LINC00521    | 1.63566 | 0.0019   | 0.016639 |
| CLEC3A       | 1.63565 | 0.0074   | 0.044655 |
| CPEB3        | 1.6351  | 5.00E-05 | 0.000967 |
| AKD1         | 1.63221 | 0.0003   | 0.004153 |
| TRANK1       | 1.63079 | 5.00E-05 | 0.000967 |
| RCBTB2       | 1.63022 | 0.00025  | 0.003659 |
| LINC-ROR     | 1.63001 | 0.00095  | 0.009766 |
| CNBD2        | 1.62915 | 0.0053   | 0.034982 |
| ZNF655       | 1.62823 | 0.0001   | 0.001745 |
| BCL3         | 1.62725 | 5.00E-05 | 0.000967 |
| TMEM86A      | 1.62694 | 0.004    | 0.02841  |
| PGM5P2       | 1.62568 | 5.00E-05 | 0.000967 |
| CCDC50       | 1.62471 | 5.00E-05 | 0.000967 |
| DHRS9        | 1.62399 | 0.0026   | 0.020846 |
| SUSD3        | 1.62217 | 0.00695  | 0.04259  |
| GPSM3        | 1.62171 | 0.00695  | 0.04259  |
| EVA1B        | 1.62164 | 0.00215  | 0.018214 |
| FUT3         | 1.6214  | 0.0009   | 0.009427 |
| YTHDC1       | 1.62122 | 5.00E-05 | 0.000967 |
| ZMYND10      | 1.62122 | 0.00095  | 0.009766 |

|          |         |          |          |
|----------|---------|----------|----------|
| HCP5     | 1.62055 | 0.0022   | 0.018543 |
| SELT     | 1.6193  | 5.00E-05 | 0.000967 |
| SLC2A12  | 1.61816 | 5.00E-05 | 0.000967 |
| C12orf50 | 1.61805 | 0.0079   | 0.046806 |
| BRAF     | 1.61777 | 5.00E-05 | 0.000967 |
| SPRED2   | 1.61754 | 5.00E-05 | 0.000967 |
| HLA-H    | 1.61666 | 0.0002   | 0.003062 |
| COL17A1  | 1.61562 | 0.00015  | 0.002431 |
| TRPM5    | 1.61145 | 0.00025  | 0.003659 |
| C15orf27 | 1.60947 | 5.00E-05 | 0.000967 |
| CD274    | 1.60869 | 0.0001   | 0.001745 |
| APOL5    | 1.60653 | 0.0086   | 0.049747 |
| SLC25A18 | 1.60634 | 0.00015  | 0.002431 |
| ANTXR2   | 1.60601 | 0.00155  | 0.014354 |
| FITM1    | 1.60367 | 0.0078   | 0.046428 |
| CD14     | 1.6034  | 0.0004   | 0.005167 |
| MYO15A   | 1.60245 | 0.0001   | 0.001745 |
| ZBP1     | 1.60101 | 0.0016   | 0.014734 |
| AKT1S1   | 1.59982 | 5.00E-05 | 0.000967 |
| ROCK1P1  | 1.59933 | 0.0005   | 0.006117 |
| CPEB2    | 1.59927 | 5.00E-05 | 0.000967 |
| COL8A2   | 1.59795 | 5.00E-05 | 0.000967 |
| CDS1     | 1.59772 | 0.0003   | 0.004153 |
| TSC22D1  | 1.59674 | 5.00E-05 | 0.000967 |
| SERPINB8 | 1.59658 | 5.00E-05 | 0.000967 |
| NEXN     | 1.59582 | 0.0002   | 0.003062 |
| TBX15    | 1.59568 | 0.00065  | 0.007427 |
| DDX25    | 1.59461 | 0.0061   | 0.038798 |
| PIP5K1A  | 1.59316 | 5.00E-05 | 0.000967 |
| ECM1     | 1.59221 | 0.00025  | 0.003659 |
| HSPB9    | 1.59207 | 0.00205  | 0.017591 |
| CAMK1G   | 1.58774 | 0.00235  | 0.019365 |
| RXFP4    | 1.58732 | 0.0003   | 0.004153 |
| OXTR     | 1.58305 | 5.00E-05 | 0.000967 |
| TMEM106A | 1.58292 | 5.00E-05 | 0.000967 |
| B2M      | 1.58287 | 5.00E-05 | 0.000967 |
| C8orf86  | 1.58232 | 0.0007   | 0.007858 |
| SAMHD1   | 1.5818  | 0.0002   | 0.003062 |
| SOAT2    | 1.57941 | 0.00355  | 0.026073 |
| C6orf99  | 1.57906 | 0.00195  | 0.016979 |
| MTSS1    | 1.57904 | 5.00E-05 | 0.000967 |
| NRIP3    | 1.57745 | 5.00E-05 | 0.000967 |
| SLC10A5  | 1.57697 | 0.0019   | 0.016639 |
| HLA-A    | 1.57696 | 5.00E-05 | 0.000967 |
| GNRHR2   | 1.5763  | 0.0038   | 0.027341 |
| ZNF547   | 1.57551 | 0.00505  | 0.033693 |
| CUL3     | 1.57421 | 0.0002   | 0.003062 |
| SOWAHD   | 1.57282 | 0.00105  | 0.010623 |
| ITGA10   | 1.57261 | 5.00E-05 | 0.000967 |

|              |         |          |          |
|--------------|---------|----------|----------|
| GJA4         | 1.57166 | 0.0065   | 0.040703 |
| ING3         | 1.57079 | 5.00E-05 | 0.000967 |
| MSANTD3      | 1.57078 | 5.00E-05 | 0.000967 |
| ABI3BP       | 1.57011 | 0.00095  | 0.009766 |
| VAMP2        | 1.56835 | 5.00E-05 | 0.000967 |
| ERV3-1       | 1.56767 | 0.0058   | 0.037289 |
| CD59         | 1.56753 | 5.00E-05 | 0.000967 |
| DUOXA1       | 1.56675 | 0.00315  | 0.023852 |
| PRSS37       | 1.56513 | 0.00175  | 0.015698 |
| MSH4         | 1.56463 | 0.00025  | 0.003659 |
| SLC36A2      | 1.56463 | 0.00025  | 0.003659 |
| SLC17A9      | 1.56413 | 0.00395  | 0.028152 |
| IGF2         | 1.5634  | 0.00685  | 0.042163 |
| AP3S1        | 1.56311 | 0.0005   | 0.006117 |
| NCCRP1       | 1.56307 | 0.0008   | 0.008653 |
| GFRA3        | 1.5626  | 0.002    | 0.017269 |
| GPR37L1      | 1.56182 | 0.0007   | 0.007858 |
| LOC100292680 | 1.56006 | 0.0001   | 0.001745 |
| PSORS1C3     | 1.55822 | 0.0003   | 0.004153 |
| CYP3A5       | 1.55773 | 0.00045  | 0.005638 |
| GPR4         | 1.55557 | 0.00085  | 0.009052 |
| SLCO1B1      | 1.55476 | 0.0005   | 0.006117 |
| CFB          | 1.55349 | 0.0002   | 0.003062 |
| ZC3H11A      | 1.55249 | 0.00015  | 0.002431 |
| DDA1         | 1.55152 | 0.0001   | 0.001745 |
| DUOX2        | 1.55036 | 0.00065  | 0.007427 |
| OTUD1        | 1.54965 | 5.00E-05 | 0.000967 |
| TINCR        | 1.5496  | 0.0001   | 0.001745 |
| TSPAN12      | 1.54768 | 0.0071   | 0.043222 |
| PLIN1        | 1.54647 | 0.00095  | 0.009766 |
| STX11        | 1.54593 | 0.00015  | 0.002431 |
| ADRB2        | 1.5455  | 0.00155  | 0.014354 |
| FAM83C       | 1.54469 | 0.00045  | 0.005638 |
| PGF          | 1.54465 | 0.0008   | 0.008653 |
| P4HA1        | 1.54367 | 5.00E-05 | 0.000967 |
| PDE6G        | 1.54362 | 0.00145  | 0.01361  |
| CTSK         | 1.54274 | 5.00E-05 | 0.000967 |
| SETX         | 1.54267 | 5.00E-05 | 0.000967 |
| LOC441155    | 1.54192 | 0.00015  | 0.002431 |
| DDX26B       | 1.54018 | 0.00165  | 0.015053 |
| BBC3         | 1.53954 | 0.00015  | 0.002431 |
| SERPINA1     | 1.53843 | 0.0006   | 0.007015 |
| TDRD7        | 1.53836 | 5.00E-05 | 0.000967 |
| LINC00525    | 1.53664 | 0.0009   | 0.009427 |
| ZNF682       | 1.53378 | 0.00105  | 0.010623 |
| LRRC71       | 1.53264 | 0.0049   | 0.032984 |
| CLTB         | 1.53239 | 0.0001   | 0.001745 |
| CYP27B1      | 1.53229 | 5.00E-05 | 0.000967 |
| RFPL2        | 1.53215 | 0.0016   | 0.014734 |

|             |         |          |          |
|-------------|---------|----------|----------|
| TRIP12      | 1.52764 | 5.00E-05 | 0.000967 |
| CDK7        | 1.52723 | 5.00E-05 | 0.000967 |
| GABRR2      | 1.52381 | 0.00615  | 0.039026 |
| PRPH2       | 1.52341 | 0.00065  | 0.007427 |
| WNT8B       | 1.52196 | 0.0021   | 0.017919 |
| KCND1       | 1.52085 | 5.00E-05 | 0.000967 |
| LETM2       | 1.52    | 0.00015  | 0.002431 |
| CCDC173     | 1.51698 | 0.0066   | 0.041051 |
| SP110       | 1.51694 | 0.0001   | 0.001745 |
| HSD3BP4     | 1.51667 | 0.00035  | 0.004678 |
| CD247       | 1.51659 | 0.0028   | 0.021921 |
| APPBP2      | 1.51611 | 5.00E-05 | 0.000967 |
| DNAJC27-AS1 | 1.51522 | 0.00025  | 0.003659 |
| LOC400027   | 1.51475 | 5.00E-05 | 0.000967 |
| NACAD       | 1.51389 | 0.00245  | 0.019913 |
| NUDT8       | 1.51386 | 0.00165  | 0.015053 |
| ANPEP       | 1.51292 | 0.0001   | 0.001745 |
| LOX         | 1.511   | 0.0002   | 0.003062 |
| MYOZ1       | 1.51014 | 0.00675  | 0.041733 |
| CREB3L1     | 1.50704 | 0.0062   | 0.039223 |
| NR1D2       | 1.50637 | 5.00E-05 | 0.000967 |
| CSPG5       | 1.50556 | 0.0013   | 0.01252  |
| CTGF        | 1.50545 | 5.00E-05 | 0.000967 |
| MTHFR       | 1.50413 | 0.0007   | 0.007858 |
| ACHE        | 1.5036  | 0.0009   | 0.009427 |
| PPP6C       | 1.50316 | 0.00035  | 0.004678 |
| CECR2       | 1.50079 | 0.0008   | 0.008653 |
| GFRA1       | 1.49991 | 5.00E-05 | 0.000967 |
| SEMA4D      | 1.49949 | 5.00E-05 | 0.000967 |
| LECT1       | 1.49778 | 0.00485  | 0.03274  |
| PLB1        | 1.49748 | 0.00075  | 0.008257 |
| THEMIS2     | 1.49735 | 0.0012   | 0.011824 |
| SCYL2       | 1.49574 | 5.00E-05 | 0.000967 |
| MYH3        | 1.49517 | 0.0001   | 0.001745 |
| TBX4        | 1.49411 | 0.00215  | 0.018214 |
| ZSCAN5A     | 1.4932  | 0.0001   | 0.001745 |
| USP6        | 1.49281 | 0.00045  | 0.005638 |
| CELF2       | 1.49268 | 0.00435  | 0.030187 |
| LTBP2       | 1.49039 | 5.00E-05 | 0.000967 |
| RRAD        | 1.48987 | 0.0047   | 0.031987 |
| LINC00470   | 1.48944 | 0.00055  | 0.006573 |
| POU3F1      | 1.48775 | 0.00485  | 0.03274  |
| KDM5B       | 1.48712 | 5.00E-05 | 0.000967 |
| PRKXP1      | 1.48689 | 0.00015  | 0.002431 |
| HIST1H2BK   | 1.48605 | 0.0002   | 0.003062 |
| CCT6B       | 1.48333 | 0.0011   | 0.011035 |
| ITGAV       | 1.48259 | 5.00E-05 | 0.000967 |
| DKK3        | 1.4823  | 0.0002   | 0.003062 |
| RBM39       | 1.48197 | 5.00E-05 | 0.000967 |

|              |         |          |          |
|--------------|---------|----------|----------|
| ITGA2B       | 1.48145 | 0.0012   | 0.011824 |
| MZB1         | 1.48035 | 0.00235  | 0.019365 |
| LOC149134    | 1.47885 | 0.00185  | 0.016374 |
| WHAMM        | 1.476   | 0.0001   | 0.001745 |
| MASP2        | 1.47562 | 0.00025  | 0.003659 |
| BTN2A2       | 1.47389 | 5.00E-05 | 0.000967 |
| C11orf68     | 1.47302 | 0.00035  | 0.004678 |
| PRDM6        | 1.47228 | 0.00165  | 0.015053 |
| KLF4         | 1.47118 | 5.00E-05 | 0.000967 |
| DDX10        | 1.47066 | 0.0001   | 0.001745 |
| FBLN5        | 1.47035 | 0.0034   | 0.025194 |
| KDM6A        | 1.47019 | 5.00E-05 | 0.000967 |
| TRABD2A      | 1.47001 | 0.00025  | 0.003659 |
| CUBN         | 1.46998 | 0.0002   | 0.003062 |
| PTHLH        | 1.4696  | 0.0003   | 0.004153 |
| LAT2         | 1.46825 | 5.00E-05 | 0.000967 |
| LOC100506233 | 1.46626 | 0.0014   | 0.013185 |
| ING1         | 1.46606 | 0.00015  | 0.002431 |
| CRY1         | 1.46435 | 0.0001   | 0.001745 |
| LOC392364    | 1.46434 | 0.00465  | 0.031738 |
| SEPW1        | 1.46419 | 5.00E-05 | 0.000967 |
| LRRC73       | 1.46308 | 0.00705  | 0.043012 |
| CD68         | 1.46248 | 0.00015  | 0.002431 |
| KIAA1683     | 1.46107 | 0.00025  | 0.003659 |
| ADRA2A       | 1.45994 | 0.0017   | 0.015408 |
| LIMA1        | 1.45861 | 0.0004   | 0.005167 |
| SPON1        | 1.4558  | 0.00035  | 0.004678 |
| SIGLEC16     | 1.45564 | 0.00035  | 0.004678 |
| CECR6        | 1.45551 | 0.00235  | 0.019365 |
| SLC25A42     | 1.45446 | 0.00065  | 0.007427 |
| ETV2         | 1.4543  | 0.0016   | 0.014734 |
| ANKRD35      | 1.45386 | 0.0043   | 0.029915 |
| H1FX         | 1.45371 | 5.00E-05 | 0.000967 |
| UFC1         | 1.45358 | 0.00025  | 0.003659 |
| ANKRD20A19P  | 1.45319 | 0.0009   | 0.009427 |
| RPS6KL1      | 1.45312 | 5.00E-05 | 0.000967 |
| KATNA1       | 1.45276 | 0.00015  | 0.002431 |
| HIST1H2AC    | 1.45167 | 0.0002   | 0.003062 |
| KCNS1        | 1.4515  | 0.00025  | 0.003659 |
| GTF2B        | 1.45118 | 5.00E-05 | 0.000967 |
| UTY          | 1.45005 | 5.00E-05 | 0.000967 |
| RASAL2       | 1.44808 | 5.00E-05 | 0.000967 |
| TNC          | 1.44765 | 0.00085  | 0.009052 |
| LILRA6       | 1.44759 | 0.00065  | 0.007427 |
| ATP1B2       | 1.44718 | 0.0009   | 0.009427 |
| LINC00520    | 1.4469  | 0.0046   | 0.0315   |
| BTBD19       | 1.44627 | 0.0071   | 0.043222 |
| ALB          | 1.44359 | 0.00835  | 0.048793 |
| KIF17        | 1.44291 | 0.00045  | 0.005638 |

|              |         |          |          |
|--------------|---------|----------|----------|
| NUP210L      | 1.44037 | 5.00E-05 | 0.000967 |
| FYB          | 1.44021 | 0.0002   | 0.003062 |
| PCID2        | 1.43962 | 5.00E-05 | 0.000967 |
| HIST2H2BA    | 1.43823 | 0.0007   | 0.007858 |
| CHMP4C       | 1.43778 | 5.00E-05 | 0.000967 |
| VSIG1        | 1.43665 | 0.0005   | 0.006117 |
| AKR7L        | 1.43612 | 0.0005   | 0.006117 |
| SLC35G5      | 1.43149 | 0.0007   | 0.007858 |
| LOC100130705 | 1.43101 | 0.00045  | 0.005638 |
| ENOX1        | 1.42977 | 0.0027   | 0.02138  |
| SLC27A3      | 1.42883 | 0.0004   | 0.005167 |
| NRXN2        | 1.42804 | 0.00295  | 0.022658 |
| ASPDH        | 1.42763 | 0.0026   | 0.020846 |
| TRIP11       | 1.42551 | 5.00E-05 | 0.000967 |
| NIPBL        | 1.42537 | 5.00E-05 | 0.000967 |
| LRRC34       | 1.42525 | 0.0029   | 0.022408 |
| ITGA11       | 1.42346 | 0.0004   | 0.005167 |
| IGSF1        | 1.42175 | 0.00075  | 0.008257 |
| XAF1         | 1.4211  | 0.00145  | 0.01361  |
| PRDM8        | 1.42097 | 0.004    | 0.02841  |
| EPC1         | 1.4194  | 5.00E-05 | 0.000967 |
| SMURF2       | 1.41895 | 5.00E-05 | 0.000967 |
| FAM46A       | 1.41839 | 5.00E-05 | 0.000967 |
| CHRM4        | 1.41713 | 0.00755  | 0.045412 |
| ASGR1        | 1.417   | 0.00145  | 0.01361  |
| IL5RA        | 1.41647 | 0.00375  | 0.027122 |
| VEGFC        | 1.41608 | 0.00025  | 0.003659 |
| PLAGL1       | 1.41586 | 0.0008   | 0.008653 |
| INSM2        | 1.41425 | 0.0051   | 0.033918 |
| FAM53C       | 1.41361 | 5.00E-05 | 0.000967 |
| CAMK2A       | 1.41247 | 0.0026   | 0.020846 |
| TMEM119      | 1.41105 | 0.0051   | 0.033918 |
| RBBP6        | 1.40995 | 0.0003   | 0.004153 |
| GORAB        | 1.40972 | 0.00035  | 0.004678 |
| CABP4        | 1.40854 | 0.00015  | 0.002431 |
| PNPT1        | 1.40837 | 5.00E-05 | 0.000967 |
| SPOCK1       | 1.40785 | 0.00055  | 0.006573 |
| PTBP2        | 1.40731 | 0.00015  | 0.002431 |
| C1orf52      | 1.40659 | 5.00E-05 | 0.000967 |
| TMCC2        | 1.4055  | 0.00075  | 0.008257 |
| LRRN4        | 1.4046  | 0.0009   | 0.009427 |
| ANKRD33B     | 1.40353 | 5.00E-05 | 0.000967 |
| KLC4         | 1.4029  | 0.00065  | 0.007427 |
| CLK4         | 1.40278 | 0.00015  | 0.002431 |
| MLL5         | 1.40186 | 0.0001   | 0.001745 |
| DKK1         | 1.40086 | 0.0001   | 0.001745 |
| LY6G5C       | 1.39929 | 0.0068   | 0.041918 |
| ZNF335       | 1.39893 | 0.00015  | 0.002431 |
| PON1         | 1.39817 | 0.00095  | 0.009766 |



|              |         |          |          |
|--------------|---------|----------|----------|
| HELQ         | 1.39795 | 0.0001   | 0.001745 |
| SPATA21      | 1.3971  | 0.0017   | 0.015408 |
| DNAJB4       | 1.39704 | 0.00035  | 0.004678 |
| LOC100505702 | 1.39555 | 0.0013   | 0.01252  |
| DUSP16       | 1.39407 | 5.00E-05 | 0.000967 |
| GPATCH2L     | 1.39335 | 5.00E-05 | 0.000967 |
| HSPB8        | 1.39246 | 0.0001   | 0.001745 |
| HIST1H2BC    | 1.39242 | 5.00E-05 | 0.000967 |
| PYROXD2      | 1.39094 | 0.0014   | 0.013185 |
| RRN3P1       | 1.39067 | 0.0004   | 0.005167 |
| HIP1R        | 1.39006 | 0.0002   | 0.003062 |
| LPPR3        | 1.38978 | 0.0039   | 0.027879 |
| FAIM3        | 1.38968 | 0.00855  | 0.049544 |
| IFRD1        | 1.38884 | 5.00E-05 | 0.000967 |
| BAZ1A        | 1.38882 | 5.00E-05 | 0.000967 |
| DHRS7B       | 1.3871  | 0.00025  | 0.003659 |
| SEC14L5      | 1.38629 | 0.0013   | 0.01252  |
| TAF2         | 1.38459 | 0.00015  | 0.002431 |
| NFYB         | 1.38258 | 0.0009   | 0.009427 |
| PDE10A       | 1.38229 | 0.0001   | 0.001745 |
| MOK          | 1.38229 | 0.0003   | 0.004153 |
| TP53INP2     | 1.38157 | 0.00025  | 0.003659 |
| RPS2P32      | 1.38155 | 0.00055  | 0.006573 |
| ARF4         | 1.38113 | 0.0002   | 0.003062 |
| TSC22D2      | 1.38101 | 5.00E-05 | 0.000967 |
| IL18R1       | 1.38064 | 0.0012   | 0.011824 |
| CAMK2B       | 1.38019 | 0.0019   | 0.016639 |
| FAM214A      | 1.37982 | 0.0004   | 0.005167 |
| DNAJC27      | 1.37961 | 0.0001   | 0.001745 |
| RGL2         | 1.37884 | 0.00025  | 0.003659 |
| SOCS3        | 1.37819 | 5.00E-05 | 0.000967 |
| C12orf61     | 1.37423 | 0.0007   | 0.007858 |
| LOC285593    | 1.37367 | 0.0054   | 0.035445 |
| LOC646999    | 1.37298 | 0.0032   | 0.024153 |
| SLC39A10     | 1.37167 | 0.0001   | 0.001745 |
| NEDD4        | 1.37086 | 5.00E-05 | 0.000967 |
| NAA38        | 1.36974 | 0.00035  | 0.004678 |
| ALS2CR12     | 1.36872 | 0.00415  | 0.029152 |
| SAMD4A       | 1.36837 | 5.00E-05 | 0.000967 |
| SP2          | 1.36707 | 0.00015  | 0.002431 |
| ZNF385A      | 1.36466 | 0.001    | 0.010186 |
| OR13H1       | 1.36445 | 0.0038   | 0.027341 |
| LOC100506385 | 1.36391 | 0.007    | 0.042786 |
| ZNF528       | 1.36359 | 0.00345  | 0.025496 |
| HELZ         | 1.36288 | 5.00E-05 | 0.000967 |
| NSRP1        | 1.36241 | 0.0003   | 0.004153 |
| SIGLEC11     | 1.36145 | 0.0014   | 0.013185 |
| IRF7         | 1.36135 | 0.0009   | 0.009427 |
| CYP3A4       | 1.36053 | 0.00235  | 0.019365 |

|            |         |          |          |
|------------|---------|----------|----------|
| VWCE       | 1.35886 | 0.00215  | 0.018214 |
| HIST1H1C   | 1.35837 | 0.00015  | 0.002431 |
| GLCCI1     | 1.35653 | 0.0005   | 0.006117 |
| RTL1       | 1.356   | 0.0006   | 0.007015 |
| GP6        | 1.35598 | 0.0006   | 0.007015 |
| NAIP       | 1.35507 | 0.0004   | 0.005167 |
| REEP2      | 1.35117 | 0.00245  | 0.019913 |
| STAT2      | 1.35115 | 0.0002   | 0.003062 |
| C16orf96   | 1.35093 | 0.0058   | 0.037289 |
| EREG       | 1.34965 | 0.0004   | 0.005167 |
| MIRLET7DHG | 1.34921 | 0.0004   | 0.005167 |
| ZNF554     | 1.34785 | 0.0006   | 0.007015 |
| FOXD4      | 1.34599 | 0.00095  | 0.009766 |
| HAPLN3     | 1.34589 | 0.0024   | 0.019631 |
| KRT15      | 1.34565 | 0.00465  | 0.031738 |
| ANO6       | 1.34466 | 0.0001   | 0.001745 |
| ZC3H12D    | 1.34421 | 0.0004   | 0.005167 |
| AQP7P1     | 1.3439  | 0.00225  | 0.01885  |
| CYP2B7P1   | 1.3432  | 0.00155  | 0.014354 |
| KIAA1217   | 1.34233 | 0.00045  | 0.005638 |
| GOLGA7B    | 1.34226 | 0.0014   | 0.013185 |
| UCP3       | 1.34057 | 0.00035  | 0.004678 |
| LRRIQ1     | 1.34003 | 0.00405  | 0.028668 |
| CCDC144C   | 1.3374  | 0.00125  | 0.012208 |
| PML        | 1.33705 | 0.0011   | 0.011035 |
| TTC33      | 1.33677 | 0.0006   | 0.007015 |
| HAL        | 1.33433 | 0.0026   | 0.020846 |
| KLB        | 1.33157 | 0.0006   | 0.007015 |
| PPP2R3C    | 1.33097 | 0.0004   | 0.005167 |
| AZIN1      | 1.33006 | 5.00E-05 | 0.000967 |
| FAR2       | 1.32976 | 0.00265  | 0.021074 |
| ADAMTS4    | 1.32899 | 0.0032   | 0.024153 |
| ZNF165     | 1.32849 | 0.0006   | 0.007015 |
| FLG        | 1.32786 | 0.00095  | 0.009766 |
| C5AR1      | 1.32779 | 0.0003   | 0.004153 |
| G2E3       | 1.3259  | 0.00065  | 0.007427 |
| ATP6V1D    | 1.32521 | 0.00025  | 0.003659 |
| BEST3      | 1.32454 | 0.00295  | 0.022658 |
| TYW5       | 1.32425 | 0.005    | 0.033413 |
| CD302      | 1.32409 | 0.0035   | 0.025785 |
| HIST1H4L   | 1.32319 | 0.00035  | 0.004678 |
| SGMS2      | 1.32237 | 0.0004   | 0.005167 |
| ZNF274     | 1.32225 | 5.00E-05 | 0.000967 |
| LINC00707  | 1.32073 | 0.0018   | 0.016069 |
| HIST1H3I   | 1.32065 | 0.00025  | 0.003659 |
| ALOX15     | 1.32056 | 0.00805  | 0.047457 |
| DIP2C      | 1.31916 | 0.00075  | 0.008257 |
| ZNF713     | 1.31815 | 0.00085  | 0.009052 |
| SLC5A5     | 1.31768 | 0.0019   | 0.016639 |

|              |         |          |          |
|--------------|---------|----------|----------|
| SCG5         | 1.31735 | 0.0013   | 0.01252  |
| PRDM1        | 1.31734 | 0.00025  | 0.003659 |
| FBXO40       | 1.31567 | 0.0024   | 0.019631 |
| TLE4         | 1.31561 | 0.00015  | 0.002431 |
| ZNF821       | 1.31529 | 0.0013   | 0.01252  |
| ANKK1        | 1.31511 | 0.00475  | 0.032248 |
| NR4A2        | 1.31398 | 0.0005   | 0.006117 |
| HAPLN4       | 1.31367 | 0.0027   | 0.02138  |
| SLC4A7       | 1.31328 | 0.00035  | 0.004678 |
| TRIO         | 1.31206 | 0.00015  | 0.002431 |
| KCNJ14       | 1.31027 | 0.0002   | 0.003062 |
| HOXB4        | 1.30826 | 0.00085  | 0.009052 |
| PARP11       | 1.30765 | 0.0013   | 0.01252  |
| IL1R2        | 1.30741 | 0.0033   | 0.024673 |
| OTX2         | 1.30726 | 0.00655  | 0.040923 |
| RAB5A        | 1.30604 | 0.0011   | 0.011035 |
| BEND3P3      | 1.30501 | 0.0002   | 0.003062 |
| CACNB2       | 1.30428 | 0.00045  | 0.005638 |
| C8orf42      | 1.30384 | 0.0009   | 0.009427 |
| CAPN3        | 1.3032  | 0.00645  | 0.040481 |
| PMAIP1       | 1.3022  | 5.00E-05 | 0.000967 |
| ASB4         | 1.3002  | 0.0055   | 0.035846 |
| LOC100506124 | 1.2997  | 0.00095  | 0.009766 |
| ELMSAN1      | 1.29848 | 5.00E-05 | 0.000967 |
| USP16        | 1.29763 | 0.0008   | 0.008653 |
| MCCC1        | 1.2966  | 0.00055  | 0.006573 |
| MITF         | 1.29602 | 0.0006   | 0.007015 |
| RHBDF1       | 1.29592 | 0.0007   | 0.007858 |
| CYFIP1       | 1.29505 | 0.0002   | 0.003062 |
| PLEK2        | 1.29424 | 0.00085  | 0.009052 |
| CEP135       | 1.29364 | 0.00095  | 0.009766 |
| TM9SF3       | 1.29363 | 0.00045  | 0.005638 |
| PNRC1        | 1.29282 | 0.0008   | 0.008653 |
| FHDC1        | 1.29199 | 0.00065  | 0.007427 |
| FSTL4        | 1.29173 | 0.0033   | 0.024673 |
| GPR137B      | 1.2905  | 0.0013   | 0.01252  |
| CCNC         | 1.28995 | 0.00085  | 0.009052 |
| MIR600HG     | 1.28976 | 0.0004   | 0.005167 |
| ALDOC        | 1.28921 | 0.002    | 0.017269 |
| SEMA3C       | 1.28901 | 5.00E-05 | 0.000967 |
| ARHGEF33     | 1.28836 | 0.0049   | 0.032984 |
| RNF10        | 1.28824 | 5.00E-05 | 0.000967 |
| NGFR         | 1.28802 | 0.00655  | 0.040923 |
| ELF1         | 1.28718 | 0.00015  | 0.002431 |
| LANCL2       | 1.28717 | 0.00015  | 0.002431 |
| PADI3        | 1.28625 | 0.0017   | 0.015408 |
| IFNGR2       | 1.28584 | 0.00065  | 0.007427 |
| SMC4         | 1.28535 | 0.00045  | 0.005638 |
| TNFRSF10D    | 1.2847  | 0.0001   | 0.001745 |

|           |         |          |          |
|-----------|---------|----------|----------|
| HIST1H2BN | 1.28469 | 0.0011   | 0.011035 |
| AXL       | 1.28415 | 0.00015  | 0.002431 |
| OPTN      | 1.28413 | 0.0005   | 0.006117 |
| KIAA1614  | 1.28369 | 0.0012   | 0.011824 |
| TJAP1     | 1.2826  | 0.0005   | 0.006117 |
| BCL10     | 1.28233 | 0.00055  | 0.006573 |
| PRKAR1A   | 1.28046 | 0.007    | 0.042786 |
| AP1G1     | 1.28042 | 5.00E-05 | 0.000967 |
| STAT5A    | 1.27949 | 0.0009   | 0.009427 |
| TEX38     | 1.27913 | 0.0082   | 0.048086 |
| NXF1      | 1.27839 | 0.0003   | 0.004153 |
| BIRC2     | 1.27816 | 0.0007   | 0.007858 |
| CLIC2     | 1.2778  | 0.00565  | 0.036623 |
| CYB5D1    | 1.27728 | 0.0044   | 0.030432 |
| EPX       | 1.27684 | 0.00415  | 0.029152 |
| ATP4A     | 1.27356 | 0.00275  | 0.021673 |
| TTN       | 1.27269 | 0.00255  | 0.020565 |
| CLCN4     | 1.27215 | 0.0003   | 0.004153 |
| CD5       | 1.27166 | 0.0055   | 0.035846 |
| SOCS2     | 1.27054 | 0.00075  | 0.008257 |
| DCBLD2    | 1.26865 | 0.00025  | 0.003659 |
| RABGGTB   | 1.2682  | 0.0005   | 0.006117 |
| APOL1     | 1.26767 | 0.00085  | 0.009052 |
| SNX16     | 1.26758 | 0.00405  | 0.028668 |
| VAV1      | 1.26331 | 0.00065  | 0.007427 |
| HCFC2     | 1.26205 | 0.00055  | 0.006573 |
| SSTR2     | 1.26086 | 0.00135  | 0.012838 |
| DNAJB6    | 1.2588  | 0.0007   | 0.007858 |
| USP49     | 1.25532 | 0.001    | 0.010186 |
| FER1L5    | 1.25524 | 0.0024   | 0.019631 |
| TBC1D23   | 1.2552  | 0.0006   | 0.007015 |
| BTG3      | 1.25492 | 0.00065  | 0.007427 |
| CHORDC1   | 1.25448 | 0.0007   | 0.007858 |
| FBXO38    | 1.25434 | 0.00025  | 0.003659 |
| RAB11FIP4 | 1.25329 | 0.00135  | 0.012838 |
| DUSP1     | 1.25177 | 0.0004   | 0.005167 |
| KBTBD8    | 1.25168 | 0.0012   | 0.011824 |
| TRIML2    | 1.25114 | 0.00015  | 0.002431 |
| MAP4K3    | 1.25097 | 0.0005   | 0.006117 |
| C2orf42   | 1.25063 | 0.00035  | 0.004678 |
| FOSL2     | 1.25021 | 0.00045  | 0.005638 |
| NLRC5     | 1.24936 | 0.00205  | 0.017591 |
| UBE2H     | 1.24857 | 0.00045  | 0.005638 |
| C1QTNF7   | 1.24853 | 0.00605  | 0.038539 |
| TNFRSF10B | 1.2482  | 0.0008   | 0.008653 |
| PRR5L     | 1.24819 | 0.0015   | 0.013976 |
| MYBL1     | 1.24522 | 0.00265  | 0.021074 |
| OSCP1     | 1.24467 | 0.0046   | 0.0315   |
| RCHY1     | 1.24417 | 0.00175  | 0.015698 |

|              |         |         |          |
|--------------|---------|---------|----------|
| HSPA1A       | 1.24225 | 0.00075 | 0.008257 |
| LOC100133612 | 1.24182 | 0.00395 | 0.028152 |
| DIABLO       | 1.23947 | 0.0007  | 0.007858 |
| LRRC25       | 1.2392  | 0.006   | 0.038323 |
| GULP1        | 1.23894 | 0.0008  | 0.008653 |
| TMED6        | 1.23765 | 0.00415 | 0.029152 |
| TAS2R3       | 1.23735 | 0.0013  | 0.01252  |
| FBXO36       | 1.2373  | 0.0012  | 0.011824 |
| ARNTL        | 1.23654 | 0.00085 | 0.009052 |
| EMP3         | 1.23635 | 0.00065 | 0.007427 |
| CEP95        | 1.2361  | 0.0003  | 0.004153 |
| LAMB4        | 1.23481 | 0.00285 | 0.022187 |
| HCRTR1       | 1.23478 | 0.0034  | 0.025194 |
| SLC24A1      | 1.23446 | 0.00075 | 0.008257 |
| CCNT2        | 1.23401 | 0.0004  | 0.005167 |
| GTF2H1       | 1.23386 | 0.00035 | 0.004678 |
| HIST2H2AC    | 1.23269 | 0.00055 | 0.006573 |
| METTL15      | 1.23119 | 0.0005  | 0.006117 |
| KRBA2        | 1.2287  | 0.0003  | 0.004153 |
| POU5F1       | 1.22843 | 0.00185 | 0.016374 |
| ZC3H7A       | 1.22805 | 0.00155 | 0.014354 |
| TIMD4        | 1.22697 | 0.001   | 0.010186 |
| INO80D       | 1.22621 | 0.0003  | 0.004153 |
| SLC23A3      | 1.22338 | 0.00305 | 0.023264 |
| CREBBP       | 1.22333 | 0.00045 | 0.005638 |
| RAB30        | 1.22313 | 0.00095 | 0.009766 |
| RBM5         | 1.22294 | 0.00065 | 0.007427 |
| NEU1         | 1.22086 | 0.0008  | 0.008653 |
| MED13        | 1.22079 | 0.0003  | 0.004153 |
| MARCH4       | 1.21965 | 0.002   | 0.017269 |
| MAPK8IP1     | 1.21945 | 0.0037  | 0.026819 |
| SMEK2        | 1.21929 | 0.0005  | 0.006117 |
| CRYBA1       | 1.21855 | 0.0051  | 0.033918 |
| LOC440905    | 1.21839 | 0.00315 | 0.023852 |
| CLDN11       | 1.21837 | 0.00515 | 0.034168 |
| THUMPD2      | 1.21806 | 0.00125 | 0.012208 |
| SUB1         | 1.21793 | 0.00195 | 0.016979 |
| SERPINB9     | 1.21768 | 0.0006  | 0.007015 |
| PLAUR        | 1.21705 | 0.00125 | 0.012208 |
| LOC100506548 | 1.2162  | 0.0006  | 0.007015 |
| BZW1         | 1.21549 | 0.00325 | 0.024387 |
| PILRA        | 1.21545 | 0.00305 | 0.023264 |
| IFT57        | 1.21466 | 0.00165 | 0.015053 |
| TRA2B        | 1.21451 | 0.00025 | 0.003659 |
| MED27        | 1.21261 | 0.00175 | 0.015698 |
| GCNT1        | 1.21206 | 0.0017  | 0.015408 |
| GBF1         | 1.21203 | 0.0004  | 0.005167 |
| SLU7         | 1.21171 | 0.00055 | 0.006573 |
| C10orf118    | 1.2113  | 0.001   | 0.010186 |

|           |         |         |          |
|-----------|---------|---------|----------|
| SP100     | 1.21121 | 0.0029  | 0.022408 |
| PPL       | 1.21089 | 0.00095 | 0.009766 |
| FAM65C    | 1.21058 | 0.0014  | 0.013185 |
| LOC283663 | 1.21033 | 0.0024  | 0.019631 |
| MYEF2     | 1.2098  | 0.0019  | 0.016639 |
| ENY2      | 1.20979 | 0.00225 | 0.01885  |
| USP9Y     | 1.20883 | 0.00175 | 0.015698 |
| PRSS27    | 1.2086  | 0.00455 | 0.031261 |
| LOC92249  | 1.20705 | 0.0017  | 0.015408 |
| ZKSCAN1   | 1.20647 | 0.00025 | 0.003659 |
| SEC23B    | 1.2061  | 0.0003  | 0.004153 |
| PPEF1     | 1.2061  | 0.00675 | 0.041733 |
| SLCO1B3   | 1.20511 | 0.00295 | 0.022658 |
| MLL3      | 1.20501 | 0.0002  | 0.003062 |
| FLJ12825  | 1.20416 | 0.0081  | 0.047701 |
| SLC45A3   | 1.2025  | 0.0025  | 0.02025  |
| KDSR      | 1.20241 | 0.00065 | 0.007427 |
| DTX3L     | 1.20141 | 0.00415 | 0.029152 |
| EP300     | 1.20134 | 0.00015 | 0.002431 |
| BCLAF1    | 1.20013 | 0.00045 | 0.005638 |
| SON       | 1.19939 | 0.0004  | 0.005167 |
| CDKN2D    | 1.19798 | 0.0034  | 0.025194 |
| ZMYM5     | 1.19723 | 0.00385 | 0.027605 |
| ZNF350    | 1.19678 | 0.00085 | 0.009052 |
| ARSJ      | 1.19672 | 0.00045 | 0.005638 |
| TTC32     | 1.19672 | 0.00215 | 0.018214 |
| STK11IP   | 1.19505 | 0.0019  | 0.016639 |
| RARRES1   | 1.19501 | 0.00535 | 0.035214 |
| YY1AP1    | 1.1946  | 0.00035 | 0.004678 |
| TRIM31    | 1.19398 | 0.0034  | 0.025194 |
| UBR5      | 1.1931  | 0.0003  | 0.004153 |
| CHMP2B    | 1.19292 | 0.0018  | 0.016069 |
| PIGA      | 1.19272 | 0.00105 | 0.010623 |
| HOMER1    | 1.19239 | 0.00135 | 0.012838 |
| STX5      | 1.19185 | 0.00105 | 0.010623 |
| AMN1      | 1.19119 | 0.00405 | 0.028668 |
| IP6K2     | 1.19061 | 0.0007  | 0.007858 |
| MED30     | 1.18987 | 0.002   | 0.017269 |
| HNRPLL    | 1.18947 | 0.00065 | 0.007427 |
| LIPG      | 1.18946 | 0.00615 | 0.039026 |
| KDM5D     | 1.18945 | 0.00105 | 0.010623 |
| LRRN4CL   | 1.18849 | 0.0028  | 0.021921 |
| DDX3Y     | 1.18704 | 0.0011  | 0.011035 |
| CHRND     | 1.18646 | 0.0026  | 0.020846 |
| LRRC48    | 1.1862  | 0.0019  | 0.016639 |
| MGC16275  | 1.18604 | 0.0008  | 0.008653 |
| SMNDC1    | 1.18126 | 0.0024  | 0.019631 |
| KCNH3     | 1.18118 | 0.0048  | 0.032482 |
| ATAD2B    | 1.18026 | 0.0013  | 0.01252  |

|           |         |         |          |
|-----------|---------|---------|----------|
| SAMD8     | 1.18019 | 0.0007  | 0.007858 |
| GRIN2C    | 1.17979 | 0.00625 | 0.03948  |
| ODC1      | 1.17947 | 0.0004  | 0.005167 |
| HNRNPH3   | 1.17829 | 0.0035  | 0.025785 |
| FAM91A1   | 1.17797 | 0.00085 | 0.009052 |
| RNMT      | 1.17646 | 0.0005  | 0.006117 |
| RASA4     | 1.17557 | 0.0027  | 0.02138  |
| MIER1     | 1.17532 | 0.00225 | 0.01885  |
| CATSPER3  | 1.17413 | 0.0072  | 0.043687 |
| AGER      | 1.17344 | 0.0037  | 0.026819 |
| USP43     | 1.17336 | 0.00215 | 0.018214 |
| PIK3C2A   | 1.17325 | 0.0014  | 0.013185 |
| BTA1F1    | 1.1732  | 0.00095 | 0.009766 |
| BACH2     | 1.1722  | 0.0049  | 0.032984 |
| SLMAP     | 1.17142 | 0.00165 | 0.015053 |
| ZNF720    | 1.1711  | 0.00165 | 0.015053 |
| SAMD9L    | 1.17088 | 0.00705 | 0.043012 |
| PVRL2     | 1.16817 | 0.0018  | 0.016069 |
| STAC3     | 1.1679  | 0.0044  | 0.030432 |
| ARIH1     | 1.16734 | 0.0004  | 0.005167 |
| MYSM1     | 1.16705 | 0.0006  | 0.007015 |
| HSD17B7P2 | 1.16688 | 0.00415 | 0.029152 |
| GATAD2B   | 1.16625 | 0.0004  | 0.005167 |
| RAB22A    | 1.16568 | 0.00115 | 0.011454 |
| ZFP36L1   | 1.16463 | 0.00025 | 0.003659 |
| SREK1     | 1.16456 | 0.0052  | 0.034431 |
| VEZF1     | 1.16436 | 0.0012  | 0.011824 |
| PTGIS     | 1.16408 | 0.0047  | 0.031987 |
| EXT1      | 1.16405 | 0.0009  | 0.009427 |
| TIGD3     | 1.16292 | 0.00485 | 0.03274  |
| FAM124A   | 1.16216 | 0.0026  | 0.020846 |
| CHGB      | 1.16179 | 0.0041  | 0.028947 |
| ERCC6L2   | 1.16177 | 0.0044  | 0.030432 |
| RB1CC1    | 1.16171 | 0.00215 | 0.018214 |
| FAM22D    | 1.15982 | 0.00175 | 0.015698 |
| NDUFAF5   | 1.15891 | 0.0022  | 0.018543 |
| HIST3H2BB | 1.15872 | 0.00175 | 0.015698 |
| CRHR2     | 1.15852 | 0.0068  | 0.041918 |
| ITGAX     | 1.15848 | 0.0057  | 0.036875 |
| PAPOLA    | 1.1584  | 0.0018  | 0.016069 |
| PAPD4     | 1.15665 | 0.00125 | 0.012208 |
| KIF20B    | 1.15632 | 0.0039  | 0.027879 |
| ATG4A     | 1.1557  | 0.0024  | 0.019631 |
| GGPS1     | 1.15542 | 0.00215 | 0.018214 |
| FRS2      | 1.15288 | 0.00075 | 0.008257 |
| HSPA1B    | 1.15279 | 0.0015  | 0.013976 |
| VAMP7     | 1.15155 | 0.00745 | 0.044892 |
| RABGEF1   | 1.15146 | 0.0021  | 0.017919 |
| FMR1      | 1.15129 | 0.005   | 0.033413 |

|           |         |         |          |
|-----------|---------|---------|----------|
| PPIG      | 1.15077 | 0.00225 | 0.01885  |
| DCUN1D3   | 1.14848 | 0.0019  | 0.016639 |
| AASS      | 1.14813 | 0.0056  | 0.036355 |
| POTEM     | 1.14676 | 0.0038  | 0.027341 |
| FUNDC2    | 1.14552 | 0.00175 | 0.015698 |
| ETF1      | 1.14524 | 0.00085 | 0.009052 |
| MAP4K5    | 1.14511 | 0.0016  | 0.014734 |
| UBR1      | 1.14505 | 0.0011  | 0.011035 |
| TMEM67    | 1.14327 | 0.00585 | 0.037553 |
| CWC22     | 1.14259 | 0.0016  | 0.014734 |
| ZBTB17    | 1.14253 | 0.0021  | 0.017919 |
| NUPL1     | 1.1421  | 0.0006  | 0.007015 |
| KLF2      | 1.13986 | 0.0037  | 0.026819 |
| SNAP23    | 1.13927 | 0.0034  | 0.025194 |
| WAPAL     | 1.1388  | 0.00135 | 0.012838 |
| TMCO3     | 1.13838 | 0.00185 | 0.016374 |
| DGUOK     | 1.13778 | 0.001   | 0.010186 |
| TM9SF4    | 1.13443 | 0.00135 | 0.012838 |
| AFF4      | 1.13424 | 0.00095 | 0.009766 |
| RYBP      | 1.13359 | 0.00275 | 0.021673 |
| FBXO33    | 1.13317 | 0.00135 | 0.012838 |
| SPATA2    | 1.13201 | 0.00155 | 0.014354 |
| ADPRM     | 1.13189 | 0.003   | 0.022946 |
| GPR111    | 1.13043 | 0.00655 | 0.040923 |
| ACSL5     | 1.12948 | 0.00715 | 0.043478 |
| PRPF38B   | 1.1287  | 0.0015  | 0.013976 |
| SIM2      | 1.12812 | 0.00235 | 0.019365 |
| ACSL4     | 1.12736 | 0.0033  | 0.024673 |
| ZYX       | 1.12586 | 0.00425 | 0.029666 |
| CAB39L    | 1.12517 | 0.00475 | 0.032248 |
| C3        | 1.12483 | 0.00315 | 0.023852 |
| BTN3A1    | 1.12429 | 0.0029  | 0.022408 |
| ANKRD42   | 1.12382 | 0.00325 | 0.024387 |
| HCCS      | 1.12253 | 0.0013  | 0.01252  |
| PRICKLE1  | 1.12253 | 0.0037  | 0.026819 |
| USP9X     | 1.1225  | 0.0017  | 0.015408 |
| NT5E      | 1.12198 | 0.00225 | 0.01885  |
| MAPT      | 1.12166 | 0.00455 | 0.031261 |
| AHR       | 1.12091 | 0.00125 | 0.012208 |
| TANK      | 1.12071 | 0.0065  | 0.040703 |
| TRIM5     | 1.12034 | 0.00335 | 0.024946 |
| GDAP1     | 1.11999 | 0.0027  | 0.02138  |
| SCFD1     | 1.11955 | 0.0034  | 0.025194 |
| CATSPERG  | 1.11893 | 0.0062  | 0.039223 |
| CREB1     | 1.11787 | 0.0006  | 0.007015 |
| B3GNT5    | 1.11763 | 0.005   | 0.033413 |
| BLZF1     | 1.11759 | 0.0036  | 0.026323 |
| TMEM107   | 1.11749 | 0.0019  | 0.016639 |
| LOC338817 | 1.11733 | 0.00685 | 0.042163 |



|           |         |         |          |
|-----------|---------|---------|----------|
| USP18     | 1.1171  | 0.00265 | 0.021074 |
| AFTPH     | 1.11707 | 0.0022  | 0.018543 |
| NR2E3     | 1.11517 | 0.0057  | 0.036875 |
| SLC9A8    | 1.11423 | 0.00125 | 0.012208 |
| TRAPPC6B  | 1.11377 | 0.0037  | 0.026819 |
| TRIB1     | 1.1128  | 0.0011  | 0.011035 |
| ATF7IP2   | 1.11252 | 0.0043  | 0.029915 |
| AKAP8L    | 1.11107 | 0.00175 | 0.015698 |
| ITSN1     | 1.10918 | 0.0028  | 0.021921 |
| TAPT1     | 1.10889 | 0.00245 | 0.019913 |
| RGS20     | 1.10187 | 0.0029  | 0.022408 |
| SYF2      | 1.10024 | 0.00455 | 0.031261 |
| SAV1      | 1.10007 | 0.0025  | 0.02025  |
| PSMC6     | 1.09967 | 0.00235 | 0.019365 |
| DPM1      | 1.09911 | 0.0026  | 0.020846 |
| SLC39A9   | 1.09893 | 0.00295 | 0.022658 |
| CSRP2     | 1.09867 | 0.0073  | 0.044132 |
| CRB2      | 1.09836 | 0.0048  | 0.032482 |
| TGFB2     | 1.09756 | 0.00175 | 0.015698 |
| PPIL4     | 1.0975  | 0.00515 | 0.034168 |
| STAR      | 1.09738 | 0.0042  | 0.029379 |
| TAB3      | 1.09649 | 0.0029  | 0.022408 |
| CWC25     | 1.09643 | 0.00095 | 0.009766 |
| SLC35F3   | 1.09584 | 0.00325 | 0.024387 |
| GPCPD1    | 1.0952  | 0.00175 | 0.015698 |
| BRWD3     | 1.09356 | 0.00325 | 0.024387 |
| YAF2      | 1.09352 | 0.0032  | 0.024153 |
| CLMP      | 1.09172 | 0.0039  | 0.027879 |
| MSS51     | 1.09068 | 0.0043  | 0.029915 |
| GGN       | 1.08915 | 0.0068  | 0.041918 |
| ZFAT      | 1.08832 | 0.0039  | 0.027879 |
| TTC27     | 1.08816 | 0.00135 | 0.012838 |
| TBK1      | 1.08799 | 0.00215 | 0.018214 |
| NBR1      | 1.08723 | 0.00135 | 0.012838 |
| CBWD1     | 1.08617 | 0.00445 | 0.030676 |
| MICALL2   | 1.086   | 0.0076  | 0.045548 |
| CASP10    | 1.08459 | 0.00605 | 0.038539 |
| ARHGAP31  | 1.08423 | 0.003   | 0.022946 |
| MRPL47    | 1.08391 | 0.0067  | 0.041533 |
| LRIF1     | 1.08376 | 0.0055  | 0.035846 |
| SAR1A     | 1.08308 | 0.0012  | 0.011824 |
| FAM200B   | 1.08208 | 0.0076  | 0.045548 |
| METTL21D  | 1.08165 | 0.00495 | 0.033213 |
| LOC284581 | 1.08118 | 0.008   | 0.047213 |
| HECA      | 1.08083 | 0.00315 | 0.023852 |
| CHIC2     | 1.08027 | 0.00855 | 0.049544 |
| ALK       | 1.08022 | 0.0055  | 0.035846 |
| USP47     | 1.07986 | 0.00185 | 0.016374 |
| IFIT5     | 1.07932 | 0.0021  | 0.017919 |

|              |         |         |          |
|--------------|---------|---------|----------|
| FAM126B      | 1.07924 | 0.00285 | 0.022187 |
| IMPA1        | 1.07831 | 0.0062  | 0.039223 |
| VEZT         | 1.07797 | 0.00205 | 0.017591 |
| BHLHE40      | 1.07762 | 0.0018  | 0.016069 |
| MAK          | 1.07744 | 0.0082  | 0.048086 |
| HNRPDL       | 1.07742 | 0.0038  | 0.027341 |
| SIRT1        | 1.07725 | 0.0063  | 0.039735 |
| RFX3         | 1.07718 | 0.00245 | 0.019913 |
| MTRF1L       | 1.07681 | 0.0017  | 0.015408 |
| TRIM21       | 1.07592 | 0.0027  | 0.02138  |
| RAP1B        | 1.07481 | 0.006   | 0.038323 |
| IRAK2        | 1.07274 | 0.00145 | 0.01361  |
| YOD1         | 1.07165 | 0.0027  | 0.02138  |
| CIC          | 1.07042 | 0.0038  | 0.027341 |
| WTAP         | 1.07023 | 0.00135 | 0.012838 |
| DPY19L2P2    | 1.06929 | 0.0036  | 0.026323 |
| HIST2H2AA3   | 1.06923 | 0.00285 | 0.022187 |
| SBDSP1       | 1.06905 | 0.0053  | 0.034982 |
| SH3GLB1      | 1.06873 | 0.0037  | 0.026819 |
| GMEB1        | 1.06862 | 0.0029  | 0.022408 |
| FAM83G       | 1.06773 | 0.00365 | 0.026607 |
| HIST1H2AJ    | 1.06738 | 0.00345 | 0.025496 |
| MCTS1        | 1.06709 | 0.00305 | 0.023264 |
| POLB         | 1.06608 | 0.00285 | 0.022187 |
| NTN4         | 1.06603 | 0.00205 | 0.017591 |
| CAND2        | 1.06536 | 0.003   | 0.022946 |
| LINC00472    | 1.06514 | 0.00285 | 0.022187 |
| ARL13B       | 1.06392 | 0.0053  | 0.034982 |
| LOC100288637 | 1.06386 | 0.00275 | 0.021673 |
| SPRY4        | 1.06368 | 0.00255 | 0.020565 |
| ST5          | 1.06331 | 0.006   | 0.038323 |
| UPP1         | 1.06326 | 0.0022  | 0.018543 |
| WAC          | 1.06261 | 0.0018  | 0.016069 |
| HAP1         | 1.0621  | 0.00795 | 0.046985 |
| VPS37B       | 1.05942 | 0.00255 | 0.020565 |
| RLF          | 1.0592  | 0.0016  | 0.014734 |
| HIST1H1D     | 1.05909 | 0.0028  | 0.021921 |
| HIST1H3E     | 1.05841 | 0.00395 | 0.028152 |
| GPRC5A       | 1.05777 | 0.0019  | 0.016639 |
| UBA6         | 1.05764 | 0.0058  | 0.037289 |
| UBE2D3       | 1.05495 | 0.0023  | 0.019134 |
| CNOT4        | 1.05422 | 0.00275 | 0.021673 |
| PIK3C3       | 1.0536  | 0.00645 | 0.040481 |
| MITD1        | 1.05284 | 0.0055  | 0.035846 |
| HIST2H4A     | 1.05283 | 0.00445 | 0.030676 |
| LDLR         | 1.05132 | 0.0023  | 0.019134 |
| JMJD6        | 1.05112 | 0.0081  | 0.047701 |
| PRKG2        | 1.04959 | 0.00835 | 0.048793 |
| ARL8B        | 1.04913 | 0.00465 | 0.031738 |

|           |         |         |          |
|-----------|---------|---------|----------|
| GPR126    | 1.04846 | 0.0027  | 0.02138  |
| DDX5      | 1.04781 | 0.00185 | 0.016374 |
| RBM24     | 1.04652 | 0.00455 | 0.031261 |
| NMT2      | 1.04545 | 0.0038  | 0.027341 |
| PNISR     | 1.04461 | 0.00265 | 0.021074 |
| BRCC3     | 1.04185 | 0.0039  | 0.027879 |
| UGCG      | 1.04117 | 0.00425 | 0.029666 |
| CDKN2AIP  | 1.04101 | 0.00225 | 0.01885  |
| NPC1      | 1.04095 | 0.0035  | 0.025785 |
| PATL1     | 1.04064 | 0.00235 | 0.019365 |
| ZC3H6     | 1.04029 | 0.0062  | 0.039223 |
| COQ7      | 1.04002 | 0.0046  | 0.0315   |
| COL7A1    | 1.03985 | 0.0033  | 0.024673 |
| CSNK2A2   | 1.03982 | 0.00495 | 0.033213 |
| HIST1H2BM | 1.03975 | 0.0036  | 0.026323 |
| ATP13A3   | 1.03914 | 0.00315 | 0.023852 |
| PPP1R2    | 1.03879 | 0.0082  | 0.048086 |
| SPIB      | 1.03877 | 0.0068  | 0.041918 |
| GATA6     | 1.03789 | 0.0062  | 0.039223 |
| ZNF461    | 1.03624 | 0.00435 | 0.030187 |
| TTF1      | 1.03501 | 0.004   | 0.02841  |
| ZBTB43    | 1.03449 | 0.00265 | 0.021074 |
| EGFR      | 1.03387 | 0.00365 | 0.026607 |
| ZC3H15    | 1.03363 | 0.0053  | 0.034982 |
| TOR1AIP2  | 1.03191 | 0.00165 | 0.015053 |
| PPP2CB    | 1.03152 | 0.00285 | 0.022187 |
| MTMR3     | 1.03016 | 0.00295 | 0.022658 |
| DRAP1     | 1.02989 | 0.0063  | 0.039735 |
| ADCY7     | 1.02982 | 0.0036  | 0.026323 |
| UBXN2B    | 1.02911 | 0.00275 | 0.021673 |
| ARID2     | 1.02867 | 0.0029  | 0.022408 |
| SRSF6     | 1.02835 | 0.0022  | 0.018543 |
| WNT4      | 1.02807 | 0.00535 | 0.035214 |
| ATG12     | 1.02545 | 0.0051  | 0.033918 |
| SRSF3     | 1.02318 | 0.0017  | 0.015408 |
| EML6      | 1.02234 | 0.0066  | 0.041051 |
| TMCO1     | 1.02165 | 0.00635 | 0.03999  |
| ZC3H12C   | 1.02087 | 0.00255 | 0.020565 |
| RAD18     | 1.01935 | 0.0043  | 0.029915 |
| ANXA3     | 1.01704 | 0.0058  | 0.037289 |
| ZNF764    | 1.01655 | 0.00485 | 0.03274  |
| KIN       | 1.01606 | 0.00605 | 0.038539 |
| STAT1     | 1.01144 | 0.0043  | 0.029915 |
| PTPN21    | 1.01137 | 0.0032  | 0.024153 |
| HIVEP1    | 1.00982 | 0.0023  | 0.019134 |
| ZUFSP     | 1.00924 | 0.00695 | 0.04259  |
| LMO7      | 1.00679 | 0.00285 | 0.022187 |
| SNX9      | 1.00678 | 0.0026  | 0.020846 |
| SBDS      | 1.00674 | 0.0051  | 0.033918 |

|            |          |         |          |
|------------|----------|---------|----------|
| DHX36      | 1.00639  | 0.0084  | 0.048965 |
| ANKRD13A   | 1.0052   | 0.0055  | 0.035846 |
| FLCN       | 1.00439  | 0.0064  | 0.040213 |
| ZNF669     | 1.00273  | 0.00545 | 0.035716 |
| GPATCH8    | 1.00122  | 0.00185 | 0.016374 |
| GCA        | 1.00015  | 0.00735 | 0.04437  |
| CA8        | 0.999653 | 0.00575 | 0.037111 |
| ANKRD13C   | 0.999599 | 0.00575 | 0.037111 |
| SPPL3      | 0.999193 | 0.00555 | 0.036115 |
| IER3       | 0.998504 | 0.00325 | 0.024387 |
| ARID3B     | 0.997159 | 0.00515 | 0.034168 |
| WNK4       | 0.996955 | 0.00695 | 0.04259  |
| AREG       | 0.996612 | 0.00435 | 0.030187 |
| BAZ2B      | 0.99564  | 0.00285 | 0.022187 |
| FNTA       | 0.995051 | 0.0066  | 0.041051 |
| COPSS5     | 0.99401  | 0.0048  | 0.032482 |
| PPP4R1L    | 0.993533 | 0.0058  | 0.037289 |
| COQ10B     | 0.993201 | 0.00555 | 0.036115 |
| TMEM81     | 0.992325 | 0.00725 | 0.043926 |
| RBM33      | 0.989059 | 0.00295 | 0.022658 |
| MEF2D      | 0.988019 | 0.0038  | 0.027341 |
| HIST2H2AA4 | 0.987559 | 0.0048  | 0.032482 |
| MIR143HG   | 0.987404 | 0.0084  | 0.048965 |
| PPAP2B     | 0.987311 | 0.00415 | 0.029152 |
| PRKAA2     | 0.987073 | 0.00795 | 0.046985 |
| TEAD1      | 0.985675 | 0.0028  | 0.021921 |
| NF1        | 0.985217 | 0.0086  | 0.049747 |
| SRSF4      | 0.985091 | 0.0055  | 0.035846 |
| ACOT9      | 0.984385 | 0.005   | 0.033413 |
| SMARCA5    | 0.983197 | 0.0044  | 0.030432 |
| WSB1       | 0.98278  | 0.00485 | 0.03274  |
| PPP2CA     | 0.982607 | 0.00455 | 0.031261 |
| HIST1H2AM  | 0.982296 | 0.0055  | 0.035846 |
| CELSR3     | 0.979975 | 0.00615 | 0.039026 |
| C11orf30   | 0.97948  | 0.00585 | 0.037553 |
| BTBD1      | 0.97939  | 0.0048  | 0.032482 |
| SLC12A7    | 0.978048 | 0.0082  | 0.048086 |
| UBN2       | 0.974927 | 0.00455 | 0.031261 |
| CNOT2      | 0.974613 | 0.005   | 0.033413 |
| SH3KBP1    | 0.972277 | 0.00475 | 0.032248 |
| ZMYM4      | 0.970257 | 0.00435 | 0.030187 |
| ZNF638     | 0.967601 | 0.00575 | 0.037111 |
| PPID       | 0.965831 | 0.0079  | 0.046806 |
| TET2       | 0.96583  | 0.00415 | 0.029152 |
| HIST1H2BO  | 0.96526  | 0.0066  | 0.041051 |
| AGAP6      | 0.964724 | 0.00535 | 0.035214 |
| ALKBH1     | 0.964316 | 0.00565 | 0.036623 |
| ATF7IP     | 0.963908 | 0.00435 | 0.030187 |
| SPOP       | 0.962137 | 0.006   | 0.038323 |

|          |          |         |          |
|----------|----------|---------|----------|
| SAP30BP  | 0.960364 | 0.0052  | 0.034431 |
| MYO5B    | 0.960266 | 0.0072  | 0.043687 |
| HAUS2    | 0.959926 | 0.00675 | 0.041733 |
| NOC3L    | 0.95906  | 0.00625 | 0.03948  |
| ARIH2    | 0.957053 | 0.00665 | 0.041284 |
| RBFOX2   | 0.956086 | 0.0036  | 0.026323 |
| C9orf131 | 0.95558  | 0.00745 | 0.044892 |
| HIST1H4B | 0.954704 | 0.00595 | 0.038106 |
| USP8     | 0.953026 | 0.00725 | 0.043926 |
| KIAA0907 | 0.952523 | 0.0046  | 0.0315   |
| BDP1     | 0.951526 | 0.00755 | 0.045412 |
| CCDC117  | 0.950715 | 0.00675 | 0.041733 |
| SNIP1    | 0.949373 | 0.0054  | 0.035445 |
| EFTUD1   | 0.948999 | 0.0056  | 0.036355 |
| NR3C1    | 0.94744  | 0.0057  | 0.036875 |
| ATF1     | 0.946907 | 0.00745 | 0.044892 |
| CHD3     | 0.94666  | 0.005   | 0.033413 |
| FXR1     | 0.946465 | 0.0084  | 0.048965 |
| C1orf63  | 0.945909 | 0.00765 | 0.045782 |
| MON2     | 0.944043 | 0.00815 | 0.047894 |
| PSME4    | 0.943479 | 0.0053  | 0.034982 |
| APOL6    | 0.939711 | 0.00785 | 0.046626 |
| FRMD4B   | 0.939433 | 0.008   | 0.047213 |
| PPP6R3   | 0.935615 | 0.00675 | 0.041733 |
| PNN      | 0.933958 | 0.0056  | 0.036355 |
| EYA3     | 0.933235 | 0.0062  | 0.039223 |
| WDR37    | 0.932131 | 0.0064  | 0.040213 |
| HNRNPC   | 0.931612 | 0.0055  | 0.035846 |
| GOSR1    | 0.930167 | 0.0046  | 0.0315   |
| RLIM     | 0.930104 | 0.00605 | 0.038539 |
| SMU1     | 0.924983 | 0.00565 | 0.036623 |
| RC3H2    | 0.923355 | 0.0055  | 0.035846 |
| SVIL     | 0.916683 | 0.0078  | 0.046428 |
| SRGAP1   | 0.914578 | 0.0054  | 0.035445 |
| TERF2    | 0.914278 | 0.0086  | 0.049746 |
| RC3H1    | 0.91377  | 0.00555 | 0.036115 |
| PRPF38A  | 0.910531 | 0.00825 | 0.048311 |
| KDM5C    | 0.90986  | 0.0083  | 0.048535 |
| WBP11    | 0.908915 | 0.0061  | 0.038798 |
| DDX39B   | 0.904371 | 0.00745 | 0.044892 |
| PTPRK    | 0.901918 | 0.0086  | 0.049747 |
| HSPA4    | 0.898982 | 0.00845 | 0.049135 |
| RPPH1    | 0.894542 | 0.0085  | 0.04934  |
| DNAJA1   | 0.882594 | 0.0083  | 0.048535 |
| EAF1     | 0.868613 | 0.00825 | 0.048311 |
| TRIM25   | 0.868006 | 0.0076  | 0.045548 |
| POGZ     | 0.857348 | 0.008   | 0.047213 |
| HIPK3    | 0.851921 | 0.00845 | 0.049135 |
| MLEC     | -0.87263 | 0.00845 | 0.049135 |

|           |          |         |          |
|-----------|----------|---------|----------|
| NUDT19    | -0.88365 | 0.00775 | 0.046247 |
| SEC61A1   | -0.88509 | 0.008   | 0.047213 |
| UCK2      | -0.89194 | 0.00855 | 0.049544 |
| RCC2      | -0.90612 | 0.0076  | 0.045548 |
| NT5DC3    | -0.90984 | 0.0077  | 0.046014 |
| OXA1L     | -0.91209 | 0.00805 | 0.047457 |
| C17orf51  | -0.91735 | 0.00605 | 0.038539 |
| DKC1      | -0.92349 | 0.0062  | 0.039223 |
| SLC35F6   | -0.92547 | 0.007   | 0.042786 |
| TGIF1     | -0.92722 | 0.0064  | 0.040213 |
| TBL1X     | -0.92929 | 0.00785 | 0.046626 |
| EDARADD   | -0.93243 | 0.00855 | 0.049544 |
| NOP56     | -0.9326  | 0.0064  | 0.040213 |
| ERMP1     | -0.93268 | 0.0076  | 0.045548 |
| LRRC37A4P | -0.93418 | 0.0068  | 0.041918 |
| LONRF2    | -0.93434 | 0.00615 | 0.039026 |
| ALDH3A2   | -0.94029 | 0.00445 | 0.030676 |
| CYB561    | -0.94179 | 0.0085  | 0.04934  |
| NUP210    | -0.94503 | 0.0082  | 0.048086 |
| LASP1     | -0.94657 | 0.00655 | 0.040923 |
| PABPC1L   | -0.94811 | 0.00785 | 0.046626 |
| ECH1      | -0.95378 | 0.00765 | 0.045782 |
| ZNF584    | -0.95407 | 0.00695 | 0.04259  |
| RBL1      | -0.95523 | 0.0067  | 0.041533 |
| MARS2     | -0.95576 | 0.0071  | 0.043222 |
| ZADH2     | -0.95677 | 0.00855 | 0.049544 |
| SFXN4     | -0.9572  | 0.0085  | 0.04934  |
| UCHL1     | -0.96037 | 0.00325 | 0.024387 |
| RETSAT    | -0.96506 | 0.00595 | 0.038106 |
| RIN2      | -0.96635 | 0.00425 | 0.029666 |
| ID2       | -0.9665  | 0.00315 | 0.023852 |
| TEX2      | -0.96697 | 0.00445 | 0.030676 |
| RRP1B     | -0.96781 | 0.00535 | 0.035214 |
| PLEKHA2   | -0.96809 | 0.00755 | 0.045412 |
| ORMDL3    | -0.96827 | 0.0066  | 0.041051 |
| SLC45A4   | -0.96833 | 0.00775 | 0.046247 |
| AMIGO2    | -0.96841 | 0.00245 | 0.019913 |
| CNNM1     | -0.96933 | 0.0042  | 0.029379 |
| TRUB2     | -0.96952 | 0.00685 | 0.042163 |
| ADO       | -0.9714  | 0.00455 | 0.031261 |
| GAPDH     | -0.97192 | 0.0062  | 0.039223 |
| DPM2      | -0.97385 | 0.00815 | 0.047894 |
| TRMT61A   | -0.97452 | 0.0073  | 0.044132 |
| TDP2      | -0.97482 | 0.0048  | 0.032482 |
| SRGN      | -0.97605 | 0.00815 | 0.047894 |
| PRRC1     | -0.97817 | 0.0051  | 0.033918 |
| SSR3      | -0.98047 | 0.0057  | 0.036875 |
| SLC9A2    | -0.98075 | 0.00815 | 0.047894 |
| ZNF70     | -0.98095 | 0.0076  | 0.045548 |

|           |          |         |          |
|-----------|----------|---------|----------|
| ZNF114    | -0.98123 | 0.0071  | 0.043222 |
| MRGBP     | -0.98208 | 0.00705 | 0.043012 |
| UHRF1     | -0.98227 | 0.0066  | 0.041051 |
| MMP24     | -0.98265 | 0.0079  | 0.046806 |
| DNAJC30   | -0.98375 | 0.00775 | 0.046247 |
| NCAPD3    | -0.98422 | 0.0046  | 0.0315   |
| PDIA6     | -0.98537 | 0.007   | 0.042786 |
| NABP2     | -0.98653 | 0.0049  | 0.032984 |
| ONECUT2   | -0.98666 | 0.0077  | 0.046014 |
| ZNF367    | -0.98734 | 0.005   | 0.033413 |
| TBC1D4    | -0.98758 | 0.0054  | 0.035445 |
| TCP11L1   | -0.98966 | 0.00575 | 0.037111 |
| SYNM      | -0.99039 | 0.003   | 0.022946 |
| TRIM27    | -0.99141 | 0.00355 | 0.026073 |
| STAG3L2   | -0.9919  | 0.0071  | 0.043222 |
| FAM220A   | -0.99277 | 0.00435 | 0.030187 |
| RASSF3    | -0.99377 | 0.00345 | 0.025496 |
| ZFP64     | -0.99533 | 0.007   | 0.042786 |
| SLC7A5P2  | -0.99849 | 0.0079  | 0.046806 |
| TIMELESS  | -1.00042 | 0.0036  | 0.026323 |
| TSEN2     | -1.00208 | 0.00665 | 0.041284 |
| ZBTB9     | -1.00231 | 0.0055  | 0.035846 |
| C7orf25   | -1.00231 | 0.0073  | 0.044132 |
| PLEKHH2   | -1.00321 | 0.0078  | 0.046428 |
| XPOT      | -1.00374 | 0.00405 | 0.028668 |
| GEMIN6    | -1.0051  | 0.0079  | 0.046806 |
| FLRT3     | -1.00548 | 0.0078  | 0.046428 |
| DDR1      | -1.00846 | 0.0084  | 0.048965 |
| TET1      | -1.00943 | 0.006   | 0.038323 |
| LOC728554 | -1.00977 | 0.0076  | 0.045548 |
| SEPHS2    | -1.01044 | 0.00315 | 0.023852 |
| ZNF768    | -1.01076 | 0.00525 | 0.034748 |
| TCF19     | -1.01208 | 0.00705 | 0.043012 |
| TRAPPC1   | -1.0139  | 0.0059  | 0.037844 |
| DYRK2     | -1.01451 | 0.00335 | 0.024946 |
| LGR4      | -1.01471 | 0.0033  | 0.024673 |
| MCM10     | -1.01509 | 0.0038  | 0.027341 |
| KCTD1     | -1.01581 | 0.00465 | 0.031738 |
| PDDC1     | -1.01608 | 0.00575 | 0.037111 |
| EPS8L2    | -1.01639 | 0.0071  | 0.043222 |
| AVPI1     | -1.01801 | 0.0042  | 0.029379 |
| KBTBD11   | -1.01993 | 0.00495 | 0.033213 |
| ZNF598    | -1.02026 | 0.00665 | 0.041284 |
| RAPGEF5   | -1.02035 | 0.0067  | 0.041533 |
| MKI67     | -1.02063 | 0.0021  | 0.017919 |
| EMP2      | -1.02145 | 0.00415 | 0.029152 |
| CALM3     | -1.02305 | 0.00325 | 0.024387 |
| NCS1      | -1.0232  | 0.00545 | 0.035716 |
| LPAR1     | -1.02413 | 0.00375 | 0.027122 |

|           |          |         |          |
|-----------|----------|---------|----------|
| AES       | -1.02418 | 0.0072  | 0.043687 |
| MRPL17    | -1.02488 | 0.00375 | 0.027122 |
| SCARA3    | -1.02503 | 0.00785 | 0.046626 |
| STAG3L1   | -1.02831 | 0.00495 | 0.033213 |
| PCLO      | -1.02834 | 0.00795 | 0.046985 |
| DUSP18    | -1.0285  | 0.00775 | 0.046247 |
| FKBP9     | -1.02853 | 0.0037  | 0.026819 |
| SLC25A23  | -1.02981 | 0.0083  | 0.048535 |
| NAGLU     | -1.02994 | 0.0055  | 0.035846 |
| NLN       | -1.03099 | 0.00425 | 0.029666 |
| PBK       | -1.03163 | 0.00845 | 0.049135 |
| ZNF740    | -1.03186 | 0.00445 | 0.030676 |
| FBXW5     | -1.03436 | 0.006   | 0.038323 |
| VANGL1    | -1.0345  | 0.00355 | 0.026073 |
| GIT1      | -1.03571 | 0.00385 | 0.027605 |
| GINS4     | -1.03807 | 0.00385 | 0.027605 |
| ALDH1A3   | -1.039   | 0.00325 | 0.024387 |
| UBE2T     | -1.03946 | 0.00475 | 0.032248 |
| APEX2     | -1.03965 | 0.00575 | 0.037111 |
| MRPS26    | -1.04107 | 0.00385 | 0.027605 |
| APEX1     | -1.04175 | 0.00175 | 0.015698 |
| C5orf54   | -1.04278 | 0.00805 | 0.047457 |
| PRPSAP1   | -1.04343 | 0.0056  | 0.036355 |
| INTS5     | -1.04358 | 0.0029  | 0.022408 |
| RRS1      | -1.04425 | 0.00445 | 0.030676 |
| TMEM203   | -1.04537 | 0.0035  | 0.025785 |
| FAM201A   | -1.04548 | 0.0065  | 0.040703 |
| BLVRB     | -1.04611 | 0.00355 | 0.026073 |
| ZNF589    | -1.04685 | 0.00465 | 0.031738 |
| MALL      | -1.04731 | 0.0041  | 0.028947 |
| KLF12     | -1.04768 | 0.0049  | 0.032984 |
| CDCA5     | -1.0477  | 0.0022  | 0.018543 |
| ZNF514    | -1.04782 | 0.00405 | 0.028668 |
| ARHGEF2   | -1.04807 | 0.00255 | 0.020565 |
| AKR1B15   | -1.04825 | 0.0027  | 0.02138  |
| WDR54     | -1.04896 | 0.00695 | 0.04259  |
| FTL       | -1.04899 | 0.00255 | 0.020565 |
| KATNAL1   | -1.04926 | 0.0064  | 0.040213 |
| FAM83H    | -1.05196 | 0.0041  | 0.028947 |
| FAM219B   | -1.05234 | 0.00165 | 0.015053 |
| H2AFX     | -1.05238 | 0.0042  | 0.029379 |
| CHST10    | -1.05285 | 0.0036  | 0.026323 |
| ADAMTS10  | -1.05458 | 0.00605 | 0.038539 |
| DNAJC22   | -1.05581 | 0.0038  | 0.027341 |
| LOC643401 | -1.05641 | 0.0052  | 0.034431 |
| ALDH3B1   | -1.05743 | 0.0046  | 0.0315   |
| CYP24A1   | -1.05744 | 0.00155 | 0.014354 |
| NUAK1     | -1.05885 | 0.00155 | 0.014354 |
| KIAA0101  | -1.05938 | 0.005   | 0.033413 |



|          |          |         |          |
|----------|----------|---------|----------|
| SHARPIN  | -1.05984 | 0.00655 | 0.040923 |
| KIAA1161 | -1.05996 | 0.0054  | 0.035445 |
| MEX3A    | -1.06018 | 0.0061  | 0.038798 |
| CTSC     | -1.06127 | 0.0081  | 0.047701 |
| TRADD    | -1.06273 | 0.0082  | 0.048086 |
| ALKBH2   | -1.06277 | 0.00465 | 0.031738 |
| ENDOD1   | -1.064   | 0.0047  | 0.031987 |
| CAMK2N1  | -1.06428 | 0.00735 | 0.04437  |
| HECTD3   | -1.06455 | 0.00695 | 0.04259  |
| CMTM7    | -1.06493 | 0.00715 | 0.043478 |
| TADA2A   | -1.06543 | 0.00385 | 0.027605 |
| CDC7     | -1.06567 | 0.0055  | 0.035846 |
| KIAA0922 | -1.06677 | 0.00495 | 0.033213 |
| TNS1     | -1.06735 | 0.00735 | 0.04437  |
| GIPC1    | -1.06859 | 0.00615 | 0.039026 |
| GNB3     | -1.06868 | 0.00725 | 0.043926 |
| DAG1     | -1.07011 | 0.0028  | 0.021921 |
| FOXC1    | -1.0708  | 0.0024  | 0.019631 |
| LIPA     | -1.07094 | 0.0047  | 0.031987 |
| MAN1B1   | -1.07145 | 0.00415 | 0.029152 |
| KCTD12   | -1.07183 | 0.004   | 0.02841  |
| SAMD5    | -1.07187 | 0.0043  | 0.029915 |
| POF1B    | -1.07391 | 0.0065  | 0.040703 |
| BBS2     | -1.07405 | 0.0044  | 0.030432 |
| GPS1     | -1.07415 | 0.00385 | 0.027605 |
| MRM1     | -1.07439 | 0.00445 | 0.030676 |
| TRIM9    | -1.07475 | 0.00245 | 0.019913 |
| E2F7     | -1.07487 | 0.0024  | 0.019631 |
| KTN1-AS1 | -1.075   | 0.00635 | 0.03999  |
| PALB2    | -1.07522 | 0.00225 | 0.01885  |
| LBR      | -1.07574 | 0.00245 | 0.019913 |
| CERCAM   | -1.07574 | 0.00865 | 0.049984 |
| ORC1     | -1.07592 | 0.00295 | 0.022658 |
| CD24     | -1.07716 | 0.00265 | 0.021074 |
| ZNF319   | -1.07917 | 0.00365 | 0.026607 |
| CDT1     | -1.07948 | 0.004   | 0.02841  |
| FECH     | -1.07963 | 0.0023  | 0.019134 |
| DGKQ     | -1.08111 | 0.00845 | 0.049135 |
| EMR1     | -1.082   | 0.00845 | 0.049135 |
| GMNN     | -1.0833  | 0.005   | 0.033413 |
| TERT     | -1.08336 | 0.0053  | 0.034982 |
| EPB49    | -1.08395 | 0.0049  | 0.032984 |
| MPI      | -1.08423 | 0.003   | 0.022946 |
| PFKFB3   | -1.08458 | 0.00335 | 0.024946 |
| ZNF485   | -1.08489 | 0.00765 | 0.045782 |
| KRBA1    | -1.08538 | 0.0078  | 0.046428 |
| DHODH    | -1.08614 | 0.00285 | 0.022187 |
| ZNF691   | -1.08721 | 0.004   | 0.02841  |
| ACPL2    | -1.08731 | 0.00545 | 0.035716 |

|          |          |         |          |
|----------|----------|---------|----------|
| CDC42EP4 | -1.08732 | 0.00215 | 0.018214 |
| ZNF239   | -1.08761 | 0.00695 | 0.04259  |
| MSH2     | -1.08841 | 0.00395 | 0.028152 |
| PTPRU    | -1.08996 | 0.0061  | 0.038798 |
| OLFML2A  | -1.09091 | 0.0043  | 0.029915 |
| GLRX     | -1.09142 | 0.0058  | 0.037289 |
| ZNF607   | -1.09152 | 0.00235 | 0.019365 |
| SLC35G1  | -1.0926  | 0.00715 | 0.043478 |
| MTUS1    | -1.09281 | 0.0015  | 0.013976 |
| ZNF823   | -1.09443 | 0.0044  | 0.030432 |
| RBM43    | -1.09509 | 0.0035  | 0.025785 |
| TMEM9    | -1.09547 | 0.0049  | 0.032984 |
| IGSF11   | -1.09678 | 0.00335 | 0.024946 |
| CDCA4    | -1.09749 | 0.0016  | 0.014734 |
| DSN1     | -1.09776 | 0.0029  | 0.022408 |
| EDEM2    | -1.09914 | 0.00305 | 0.023264 |
| CBX7     | -1.09995 | 0.0069  | 0.042424 |
| NCR3LG1  | -1.10151 | 0.0024  | 0.019631 |
| CXXC4    | -1.1017  | 0.0042  | 0.029379 |
| GTF2IRD1 | -1.10205 | 0.0046  | 0.0315   |
| GCLC     | -1.10211 | 0.003   | 0.022946 |
| POR      | -1.10241 | 0.0053  | 0.034982 |
| PTGFRN   | -1.10337 | 0.00185 | 0.016374 |
| TPI1     | -1.10394 | 0.0019  | 0.016639 |
| KDELC2   | -1.1045  | 0.00295 | 0.022658 |
| SLFN11   | -1.10465 | 0.00375 | 0.027122 |
| ZNF285   | -1.10551 | 0.00495 | 0.033213 |
| LEPREL4  | -1.10596 | 0.00305 | 0.023264 |
| HNF1B    | -1.10772 | 0.0021  | 0.017919 |
| KLF11    | -1.10911 | 0.0022  | 0.018543 |
| RNF222   | -1.10967 | 0.0076  | 0.045548 |
| GSTP1    | -1.10973 | 0.0013  | 0.01252  |
| MAZ      | -1.1102  | 0.00235 | 0.019365 |
| TICRR    | -1.11047 | 0.0023  | 0.019134 |
| HLTF     | -1.11146 | 0.0026  | 0.020846 |
| FOXN3    | -1.11509 | 0.0044  | 0.030432 |
| RASSF2   | -1.11551 | 0.002   | 0.017269 |
| RPP40    | -1.11609 | 0.00475 | 0.032248 |
| CHST14   | -1.1162  | 0.0084  | 0.048965 |
| ZNF71    | -1.11701 | 0.0025  | 0.02025  |
| MCM3     | -1.11797 | 0.00115 | 0.011454 |
| ANK3     | -1.11917 | 0.0069  | 0.042424 |
| PLCXD3   | -1.11923 | 0.00545 | 0.035716 |
| DNASE2   | -1.12092 | 0.0021  | 0.017919 |
| PXMP4    | -1.12093 | 0.00285 | 0.022187 |
| FADS1    | -1.1216  | 0.00065 | 0.007427 |
| ADPRH    | -1.12174 | 0.0058  | 0.037289 |
| WDR81    | -1.12206 | 0.00235 | 0.019365 |
| MGST1    | -1.12261 | 0.0024  | 0.019631 |

|           |          |         |          |
|-----------|----------|---------|----------|
| HOXB7     | -1.12293 | 0.00315 | 0.023852 |
| GALT      | -1.12294 | 0.00455 | 0.031261 |
| EEF2K     | -1.1236  | 0.0014  | 0.013185 |
| VWA1      | -1.12384 | 0.0069  | 0.042424 |
| PSMG3     | -1.12387 | 0.0044  | 0.030432 |
| ARSE      | -1.12477 | 0.0028  | 0.021921 |
| RNASEL    | -1.12514 | 0.00275 | 0.021673 |
| CBX8      | -1.12555 | 0.0037  | 0.026819 |
| DHRS4L2   | -1.12632 | 0.0065  | 0.040703 |
| SORD      | -1.12639 | 0.00135 | 0.012838 |
| CTPS1     | -1.12689 | 0.0004  | 0.005167 |
| FOXE1     | -1.12707 | 0.00195 | 0.016979 |
| PHF17     | -1.12728 | 0.0012  | 0.011824 |
| GPRIN3    | -1.12773 | 0.0007  | 0.007858 |
| JDP2      | -1.12784 | 0.003   | 0.022946 |
| CCND1     | -1.12799 | 0.00085 | 0.009052 |
| RASSF6    | -1.12856 | 0.0037  | 0.026819 |
| ARRDC2    | -1.12861 | 0.00235 | 0.019365 |
| UGDH      | -1.12899 | 0.00095 | 0.009766 |
| RHOBTB3   | -1.12968 | 0.0021  | 0.017919 |
| PRIM1     | -1.13108 | 0.00265 | 0.021074 |
| VOPP1     | -1.1311  | 0.0016  | 0.014734 |
| LOC344887 | -1.13122 | 0.0009  | 0.009427 |
| FAM155B   | -1.13159 | 0.0029  | 0.022408 |
| MAPK11    | -1.1316  | 0.0063  | 0.039735 |
| LRP8      | -1.13201 | 0.0034  | 0.025194 |
| CBX6      | -1.13358 | 0.0019  | 0.016639 |
| METRN     | -1.13441 | 0.00595 | 0.038106 |
| HEATR3    | -1.13501 | 0.00195 | 0.016979 |
| TMEM14A   | -1.13532 | 0.0066  | 0.041051 |
| EPHX2     | -1.13734 | 0.00385 | 0.027605 |
| PLD6      | -1.13777 | 0.0013  | 0.01252  |
| IGFBP3    | -1.1378  | 0.0015  | 0.013976 |
| LOC339803 | -1.13813 | 0.0028  | 0.021921 |
| XBP1      | -1.1411  | 0.00085 | 0.009052 |
| MAT2A     | -1.14192 | 0.00215 | 0.018214 |
| PARS2     | -1.14213 | 0.0029  | 0.022408 |
| LARP1     | -1.14232 | 0.0006  | 0.007015 |
| MAD2L1    | -1.1424  | 0.0023  | 0.019134 |
| EVPL      | -1.14298 | 0.0031  | 0.023602 |
| ANGEL1    | -1.14403 | 0.00175 | 0.015698 |
| VASH1     | -1.14408 | 0.00275 | 0.021673 |
| ANXA2R    | -1.14455 | 0.0041  | 0.028947 |
| SEC16B    | -1.14505 | 0.0047  | 0.031987 |
| ZNF221    | -1.14513 | 0.00735 | 0.04437  |
| STX1B     | -1.14791 | 0.003   | 0.022946 |
| METTL21B  | -1.1484  | 0.00235 | 0.019365 |
| GATA2     | -1.14844 | 0.00395 | 0.028152 |
| BAMBI     | -1.14887 | 0.00165 | 0.015053 |

|           |          |         |          |
|-----------|----------|---------|----------|
| FN3KRP    | -1.14982 | 0.00205 | 0.017591 |
| ACSS1     | -1.15085 | 0.0036  | 0.026323 |
| FAM129A   | -1.15086 | 0.0023  | 0.019134 |
| AGPAT2    | -1.15093 | 0.00725 | 0.043926 |
| DTX4      | -1.15117 | 0.0034  | 0.025194 |
| STAG3L3   | -1.15259 | 0.00255 | 0.020565 |
| FAM109A   | -1.15513 | 0.0072  | 0.043687 |
| LTBR      | -1.15531 | 0.0017  | 0.015408 |
| CHST3     | -1.15559 | 0.00055 | 0.006573 |
| USP27X    | -1.15577 | 0.0034  | 0.025194 |
| ANKRD39   | -1.15645 | 0.00485 | 0.03274  |
| RALGDS    | -1.15675 | 0.0027  | 0.02138  |
| VPS26B    | -1.15711 | 0.0016  | 0.014734 |
| PCOLCE2   | -1.1574  | 0.00415 | 0.029152 |
| UPK1B     | -1.15747 | 0.002   | 0.017269 |
| ELF3      | -1.15754 | 0.0012  | 0.011824 |
| HOXA13    | -1.15815 | 0.0065  | 0.040703 |
| LRFN1     | -1.15827 | 0.00825 | 0.048311 |
| ERCC2     | -1.15858 | 0.0078  | 0.046428 |
| MCM4      | -1.15866 | 0.00075 | 0.008257 |
| C11orf95  | -1.15987 | 0.0011  | 0.011035 |
| GAB2      | -1.16045 | 0.0015  | 0.013976 |
| MCM6      | -1.16076 | 0.00045 | 0.005638 |
| CEP19     | -1.16112 | 0.00355 | 0.026073 |
| LINC00482 | -1.16199 | 0.00365 | 0.026607 |
| PACSIN3   | -1.16218 | 0.00505 | 0.033693 |
| SLC25A15  | -1.1635  | 0.00515 | 0.034168 |
| TP53INP1  | -1.16369 | 0.00355 | 0.026073 |
| CYB5A     | -1.164   | 0.0029  | 0.022408 |
| MED22     | -1.16534 | 0.00155 | 0.014354 |
| ZNF658    | -1.16567 | 0.0024  | 0.019631 |
| DIXDC1    | -1.16668 | 0.00405 | 0.028668 |
| LMNB2     | -1.16684 | 0.00165 | 0.015053 |
| PDXP      | -1.16704 | 0.0037  | 0.026819 |
| TMEM19    | -1.16729 | 0.00185 | 0.016374 |
| MON1A     | -1.16746 | 0.007   | 0.042786 |
| PLCH1     | -1.1676  | 0.002   | 0.017269 |
| KIF3C     | -1.16906 | 0.00145 | 0.01361  |
| PCK2      | -1.16938 | 0.00185 | 0.016374 |
| PPCDC     | -1.16946 | 0.00195 | 0.016979 |
| ZNF469    | -1.17028 | 0.0019  | 0.016639 |
| SOGA1     | -1.17081 | 0.00205 | 0.017591 |
| GLT25D1   | -1.17112 | 0.0015  | 0.013976 |
| FLYWCH2   | -1.17123 | 0.00355 | 0.026073 |
| SCARB1    | -1.17217 | 0.0018  | 0.016069 |
| ZNF280B   | -1.17219 | 0.00185 | 0.016374 |
| ZDHHHC23  | -1.17224 | 0.0022  | 0.018543 |
| TMEM109   | -1.17245 | 0.0025  | 0.02025  |
| MAVS      | -1.17285 | 0.001   | 0.010186 |

|           |          |         |          |
|-----------|----------|---------|----------|
| HEG1      | -1.17356 | 0.0019  | 0.016639 |
| KLHDC8B   | -1.17577 | 0.0059  | 0.037844 |
| ZNF500    | -1.1759  | 0.0022  | 0.018543 |
| LOC728743 | -1.178   | 0.00555 | 0.036115 |
| PIR       | -1.18055 | 0.00495 | 0.033213 |
| KCNG1     | -1.18119 | 0.0052  | 0.034431 |
| MIIP      | -1.18163 | 0.00665 | 0.041284 |
| CCDC115   | -1.18166 | 0.0023  | 0.019134 |
| FOXL1     | -1.18311 | 0.0066  | 0.041051 |
| SPIN3     | -1.18418 | 0.0066  | 0.041051 |
| PROCR     | -1.18443 | 0.00105 | 0.010623 |
| CREB3L2   | -1.18522 | 0.00475 | 0.032248 |
| TMEM106C  | -1.18524 | 0.00135 | 0.012838 |
| WFS1      | -1.18643 | 0.0024  | 0.019631 |
| KRT83     | -1.18658 | 0.0078  | 0.046428 |
| NRCAM     | -1.18776 | 0.0004  | 0.005167 |
| CCL2      | -1.18804 | 0.00075 | 0.008257 |
| SH3GLB2   | -1.18827 | 0.00325 | 0.024387 |
| MYLK      | -1.18912 | 0.00705 | 0.043012 |
| SNX18     | -1.18932 | 0.00245 | 0.019913 |
| SMAD6     | -1.19012 | 0.00565 | 0.036623 |
| BPHL      | -1.19025 | 0.00275 | 0.021673 |
| PRDX1     | -1.19103 | 0.00045 | 0.005638 |
| TALDO1    | -1.19174 | 0.00065 | 0.007427 |
| KANK2     | -1.19256 | 0.00135 | 0.012838 |
| CDC25B    | -1.19309 | 0.0008  | 0.008653 |
| PAX9      | -1.19312 | 0.0023  | 0.019134 |
| LY6E      | -1.19338 | 0.0021  | 0.017919 |
| APEH      | -1.19377 | 0.00125 | 0.012208 |
| SDPR      | -1.19457 | 0.00085 | 0.009052 |
| MAPK12    | -1.19487 | 0.0038  | 0.027341 |
| TMTC4     | -1.19494 | 0.0012  | 0.011824 |
| ASB13     | -1.19587 | 0.00185 | 0.016374 |
| GBX2      | -1.19595 | 0.0075  | 0.045177 |
| PCED1B    | -1.1965  | 0.00445 | 0.030676 |
| AKR1A1    | -1.19654 | 0.0012  | 0.011824 |
| FAM136A   | -1.19694 | 0.0006  | 0.007015 |
| SCARA5    | -1.19813 | 0.00265 | 0.021074 |
| B3GAT3    | -1.19875 | 0.0022  | 0.018543 |
| RSAD1     | -1.19943 | 0.0007  | 0.007858 |
| SPSB3     | -1.20006 | 0.0031  | 0.023602 |
| RIMS3     | -1.20104 | 0.00185 | 0.016374 |
| FOXA2     | -1.20125 | 0.00115 | 0.011454 |
| RHOBTB1   | -1.20144 | 0.00075 | 0.008257 |
| CREG1     | -1.20297 | 0.00135 | 0.012838 |
| FOXRED2   | -1.20365 | 0.00075 | 0.008257 |
| ZNF395    | -1.20373 | 0.0007  | 0.007858 |
| TMEM129   | -1.20518 | 0.00235 | 0.019365 |
| ANKRD36B  | -1.20573 | 0.00105 | 0.010623 |

|           |          |         |          |
|-----------|----------|---------|----------|
| SLC19A1   | -1.20576 | 0.0055  | 0.035846 |
| FAM57A    | -1.2068  | 0.00055 | 0.006573 |
| LINC00488 | -1.20716 | 0.0079  | 0.046806 |
| SLC6A6    | -1.20719 | 0.004   | 0.02841  |
| RMI1      | -1.20802 | 0.00245 | 0.019913 |
| FUT1      | -1.2082  | 0.0025  | 0.02025  |
| SLC29A1   | -1.20878 | 0.0014  | 0.013185 |
| PYCR1     | -1.20924 | 0.00235 | 0.019365 |
| ZNF618    | -1.21021 | 0.00045 | 0.005638 |
| DGCR6L    | -1.21068 | 0.00645 | 0.040481 |
| ANKRD36   | -1.21127 | 0.0009  | 0.009427 |
| MBOAT1    | -1.21129 | 0.0014  | 0.013185 |
| TTC3P1    | -1.21224 | 0.0036  | 0.026323 |
| NLE1      | -1.2127  | 0.0006  | 0.007015 |
| NPDC1     | -1.21293 | 0.0033  | 0.024673 |
| SPATA20   | -1.21342 | 0.0014  | 0.013185 |
| FAM203A   | -1.2135  | 0.00305 | 0.023264 |
| GDPGP1    | -1.21467 | 0.0028  | 0.021921 |
| ZBTB42    | -1.2151  | 0.00255 | 0.020565 |
| KBTBD6    | -1.21529 | 0.00085 | 0.009052 |
| TRIM16    | -1.21691 | 0.00055 | 0.006573 |
| LRRC8D    | -1.21709 | 0.00095 | 0.009766 |
| NRSN2     | -1.2179  | 0.002   | 0.017269 |
| AHNAK2    | -1.21816 | 0.0004  | 0.005167 |
| EXO1      | -1.2186  | 0.00055 | 0.006573 |
| BET1L     | -1.21926 | 0.0008  | 0.008653 |
| POP1      | -1.21927 | 0.0008  | 0.008653 |
| THBD      | -1.22029 | 0.0019  | 0.016639 |
| GPRIN1    | -1.22033 | 0.00135 | 0.012838 |
| CCDC103   | -1.22041 | 0.0024  | 0.019631 |
| HOXD8     | -1.22115 | 0.0043  | 0.029915 |
| CEP78     | -1.2218  | 0.001   | 0.010186 |
| HOXA10    | -1.22211 | 0.003   | 0.022946 |
| FZD5      | -1.22234 | 0.0003  | 0.004153 |
| EIF4EBP1  | -1.22252 | 0.0003  | 0.004153 |
| LDHA      | -1.22283 | 0.0004  | 0.005167 |
| C14orf80  | -1.22291 | 0.00315 | 0.023852 |
| IGSF3     | -1.2236  | 0.0013  | 0.01252  |
| C1orf216  | -1.22394 | 0.0009  | 0.009427 |
| C5orf30   | -1.22419 | 0.0006  | 0.007015 |
| SP9       | -1.22507 | 0.0072  | 0.043687 |
| NAP1L2    | -1.22509 | 0.0024  | 0.019631 |
| DSCC1     | -1.22543 | 0.00265 | 0.021074 |
| KCTD7     | -1.22559 | 0.00085 | 0.009052 |
| CBS       | -1.22598 | 0.00095 | 0.009766 |
| VIPR1     | -1.22608 | 0.00755 | 0.045412 |
| ABHD14B   | -1.2265  | 0.0015  | 0.013976 |
| TRIM7     | -1.22667 | 0.00405 | 0.028668 |
| GEMIN4    | -1.22693 | 0.00035 | 0.004678 |

|              |          |         |          |
|--------------|----------|---------|----------|
| SMIM4        | -1.22752 | 0.00365 | 0.026607 |
| LOC153684    | -1.2279  | 0.0014  | 0.013185 |
| ZNF284       | -1.228   | 0.0031  | 0.023602 |
| LRRC45       | -1.22836 | 0.0032  | 0.024153 |
| SAPCD2       | -1.22867 | 0.0009  | 0.009427 |
| PLEKHG4      | -1.22949 | 0.0085  | 0.04934  |
| CDH17        | -1.22976 | 0.00265 | 0.021074 |
| FADD         | -1.22993 | 0.00065 | 0.007427 |
| RGS3         | -1.23045 | 0.00215 | 0.018214 |
| MAP1B        | -1.23112 | 0.0002  | 0.003062 |
| CDC6         | -1.23161 | 0.00025 | 0.003659 |
| FIGNL2       | -1.23222 | 0.0017  | 0.015408 |
| PTGR1        | -1.23247 | 0.0011  | 0.011035 |
| FLYWCH1      | -1.23337 | 0.002   | 0.017269 |
| CENPB        | -1.23482 | 0.0009  | 0.009427 |
| RNF187       | -1.23509 | 0.0013  | 0.01252  |
| LRP3         | -1.23591 | 0.00215 | 0.018214 |
| PELO         | -1.23618 | 0.00015 | 0.002431 |
| HSD17B1      | -1.23648 | 0.00135 | 0.012838 |
| PDIA4        | -1.23673 | 0.00045 | 0.005638 |
| HYAL2        | -1.23696 | 0.0014  | 0.013185 |
| PWWP2B       | -1.23703 | 0.0019  | 0.016639 |
| GPT2         | -1.23732 | 0.001   | 0.010186 |
| MRPL55       | -1.23738 | 0.0023  | 0.019134 |
| SLC6A9       | -1.23827 | 0.0058  | 0.037289 |
| FAM174B      | -1.23835 | 0.00215 | 0.018214 |
| PANK1        | -1.24123 | 0.00155 | 0.014354 |
| MCM2         | -1.24218 | 0.00045 | 0.005638 |
| WDR76        | -1.24327 | 0.0009  | 0.009427 |
| GCKR         | -1.24361 | 0.0079  | 0.046806 |
| SMO          | -1.24552 | 0.00175 | 0.015698 |
| KEAP1        | -1.2457  | 0.00045 | 0.005638 |
| CDC42EP1     | -1.24577 | 0.00115 | 0.011454 |
| PACSIN2      | -1.24594 | 0.00025 | 0.003659 |
| LPIN3        | -1.24616 | 0.00515 | 0.034168 |
| MID1IP1      | -1.24663 | 0.0003  | 0.004153 |
| HMGB2        | -1.24731 | 0.0006  | 0.007015 |
| NFE2L1       | -1.24757 | 0.00015 | 0.002431 |
| TRIM35       | -1.24791 | 0.0005  | 0.006117 |
| LYSMD2       | -1.24874 | 0.00245 | 0.019913 |
| PTCH1        | -1.24896 | 0.00115 | 0.011454 |
| PHGDH        | -1.24899 | 0.0003  | 0.004153 |
| PECR         | -1.24947 | 0.00075 | 0.008257 |
| LOC100506054 | -1.24964 | 0.00135 | 0.012838 |
| PPP1R26      | -1.25044 | 0.00095 | 0.009766 |
| SLC10A3      | -1.25064 | 0.002   | 0.017269 |
| HINT2        | -1.25079 | 0.002   | 0.017269 |
| HHEX         | -1.25125 | 0.0007  | 0.007858 |
| FADS2        | -1.25132 | 0.00055 | 0.006573 |

|           |          |         |          |
|-----------|----------|---------|----------|
| ANKRD2    | -1.25417 | 0.0068  | 0.041918 |
| EPS8L3    | -1.2575  | 0.00865 | 0.049984 |
| TBC1D2B   | -1.26016 | 0.0007  | 0.007858 |
| PPAP2C    | -1.26019 | 0.001   | 0.010186 |
| GSTM4     | -1.26053 | 0.00365 | 0.026607 |
| PIK3C2B   | -1.26203 | 0.00035 | 0.004678 |
| IMPA2     | -1.26315 | 0.0014  | 0.013185 |
| WDR4      | -1.26415 | 0.0013  | 0.01252  |
| SIRPA     | -1.26686 | 0.00075 | 0.008257 |
| SCNN1D    | -1.26709 | 0.007   | 0.042786 |
| TSPAN13   | -1.2684  | 0.0041  | 0.028947 |
| SGSH      | -1.26855 | 0.0076  | 0.045548 |
| ARMC2     | -1.26914 | 0.00795 | 0.046985 |
| NR2F6     | -1.26992 | 0.00075 | 0.008257 |
| ZC3HAV1L  | -1.27002 | 0.0006  | 0.007015 |
| KIF21B    | -1.27085 | 0.00035 | 0.004678 |
| TMEM141   | -1.2711  | 0.00325 | 0.024387 |
| GTDC2     | -1.27258 | 0.00185 | 0.016374 |
| RNFT2     | -1.2739  | 0.0012  | 0.011824 |
| CCR7      | -1.27438 | 0.0013  | 0.01252  |
| SCD       | -1.27444 | 0.00015 | 0.002431 |
| NIT2      | -1.27561 | 0.0008  | 0.008653 |
| C21orf58  | -1.27568 | 0.0009  | 0.009427 |
| SLC5A11   | -1.27593 | 0.00125 | 0.012208 |
| NGFRAP1   | -1.27606 | 0.0008  | 0.008653 |
| MARCH1    | -1.27714 | 0.00105 | 0.010623 |
| SRPRB     | -1.27733 | 0.00035 | 0.004678 |
| PSAT1     | -1.27796 | 0.00025 | 0.003659 |
| TP53TG1   | -1.27966 | 0.00295 | 0.022658 |
| LMNB1     | -1.28034 | 0.00095 | 0.009766 |
| BCAT1     | -1.28047 | 0.0006  | 0.007015 |
| FAM84B    | -1.2808  | 0.0003  | 0.004153 |
| NIPSNAP1  | -1.28149 | 0.0009  | 0.009427 |
| MST1P2    | -1.28255 | 0.00765 | 0.045782 |
| FADS3     | -1.28263 | 0.00165 | 0.015053 |
| EPHB4     | -1.28479 | 0.00045 | 0.005638 |
| GFOD1     | -1.28785 | 0.00385 | 0.027605 |
| PCYOX1L   | -1.28825 | 0.0015  | 0.013976 |
| L3HYPDH   | -1.29094 | 0.0008  | 0.008653 |
| GPD1L     | -1.2915  | 0.00045 | 0.005638 |
| B4GALT2   | -1.29211 | 0.0006  | 0.007015 |
| LINC00638 | -1.29524 | 0.0023  | 0.019134 |
| AURKB     | -1.29595 | 0.00065 | 0.007427 |
| LZTS2     | -1.29609 | 0.0023  | 0.019134 |
| TPGS2     | -1.29663 | 0.0064  | 0.040213 |
| GYG2      | -1.29707 | 0.00195 | 0.016979 |
| AKAP1     | -1.29789 | 0.0003  | 0.004153 |
| SLC35C1   | -1.29812 | 0.00065 | 0.007427 |
| NQO2      | -1.29946 | 0.00025 | 0.003659 |



|           |          |          |          |
|-----------|----------|----------|----------|
| RHPN1     | -1.2997  | 0.00195  | 0.016979 |
| ZNF74     | -1.29998 | 0.0005   | 0.006117 |
| NHLRC1    | -1.30031 | 0.0014   | 0.013185 |
| DGKG      | -1.30137 | 0.00035  | 0.004678 |
| FAM226B   | -1.30158 | 0.00345  | 0.025496 |
| SIGMAR1   | -1.30341 | 0.00035  | 0.004678 |
| G6PD      | -1.30356 | 0.00055  | 0.006573 |
| GMPPA     | -1.30372 | 0.0012   | 0.011824 |
| C14orf169 | -1.3038  | 0.0028   | 0.021921 |
| MYBBP1A   | -1.30384 | 0.0011   | 0.011035 |
| LHX2      | -1.30408 | 0.0018   | 0.016069 |
| HR        | -1.30424 | 0.00115  | 0.011454 |
| AKR1B10   | -1.30472 | 0.0001   | 0.001745 |
| CA12      | -1.30527 | 0.00015  | 0.002431 |
| ROGDI     | -1.30682 | 0.00585  | 0.037553 |
| DHCR24    | -1.30768 | 0.00025  | 0.003659 |
| CCNF      | -1.30794 | 0.00045  | 0.005638 |
| AUNIP     | -1.30824 | 0.0003   | 0.004153 |
| SLC46A1   | -1.3102  | 0.00095  | 0.009766 |
| HDHD3     | -1.3119  | 0.00075  | 0.008257 |
| MST1      | -1.31297 | 0.00205  | 0.017591 |
| NRM       | -1.31347 | 0.002    | 0.017269 |
| LOC728431 | -1.31391 | 0.0005   | 0.006117 |
| DNMT3B    | -1.31644 | 0.0008   | 0.008653 |
| SUMF2     | -1.31692 | 0.00225  | 0.01885  |
| ZBTB25    | -1.31744 | 0.00015  | 0.002431 |
| PDXK      | -1.31751 | 0.00025  | 0.003659 |
| VEGFB     | -1.32011 | 0.00115  | 0.011454 |
| PCDH9     | -1.32169 | 0.0001   | 0.001745 |
| MB        | -1.32259 | 0.00415  | 0.029152 |
| LFNG      | -1.32284 | 0.0019   | 0.016639 |
| GRAPL     | -1.32289 | 0.00255  | 0.020565 |
| TUBA1B    | -1.32395 | 0.00015  | 0.002431 |
| GATS      | -1.32451 | 0.00215  | 0.018214 |
| TMEM175   | -1.32473 | 0.00265  | 0.021074 |
| TXNDC5    | -1.32627 | 0.0086   | 0.049747 |
| GSR       | -1.32646 | 5.00E-05 | 0.000967 |
| SLC25A11  | -1.32681 | 0.00075  | 0.008257 |
| PQLC3     | -1.32725 | 0.00095  | 0.009766 |
| PRKCQ-AS1 | -1.32795 | 0.00065  | 0.007427 |
| ONECUT1   | -1.3283  | 0.00515  | 0.034168 |
| MANEAL    | -1.3295  | 0.00055  | 0.006573 |
| MFSD3     | -1.33043 | 0.00225  | 0.01885  |
| NQO1      | -1.33174 | 0.0002   | 0.003062 |
| PIGM      | -1.33202 | 0.00015  | 0.002431 |
| FAM64A    | -1.33346 | 0.00035  | 0.004678 |
| AGTRAP    | -1.33364 | 0.00115  | 0.011454 |
| F8A1,F8A3 | -1.33533 | 0.00595  | 0.038106 |
| CRTAP     | -1.33608 | 5.00E-05 | 0.000967 |

|           |          |          |          |
|-----------|----------|----------|----------|
| TTC39B    | -1.33635 | 0.0015   | 0.013976 |
| GIN52     | -1.33677 | 0.0004   | 0.005167 |
| ABCA12    | -1.3372  | 0.00185  | 0.016374 |
| TIGD2     | -1.34038 | 0.00075  | 0.008257 |
| LYNX1     | -1.343   | 0.00815  | 0.047894 |
| CDPF1     | -1.34415 | 0.0009   | 0.009427 |
| TUB       | -1.34439 | 0.00055  | 0.006573 |
| C10orf114 | -1.3453  | 0.0009   | 0.009427 |
| VLDLR     | -1.34551 | 0.0002   | 0.003062 |
| RFXAP     | -1.34744 | 0.00225  | 0.01885  |
| WBSCR27   | -1.34814 | 0.00405  | 0.028668 |
| PANX2     | -1.34935 | 0.0026   | 0.020846 |
| FAM213B   | -1.3525  | 0.00195  | 0.016979 |
| PFN2      | -1.35341 | 0.00025  | 0.003659 |
| ZFP62     | -1.35539 | 0.0002   | 0.003062 |
| MRPL34    | -1.35562 | 0.00065  | 0.007427 |
| LOC344595 | -1.35671 | 0.0015   | 0.013976 |
| SLC37A4   | -1.35698 | 0.00075  | 0.008257 |
| PAOX      | -1.35768 | 0.00325  | 0.024387 |
| ZNF771    | -1.36039 | 0.005    | 0.033413 |
| DGAT2     | -1.36205 | 0.00165  | 0.015053 |
| BLOC1S4   | -1.36253 | 0.0003   | 0.004153 |
| RAB3D     | -1.36309 | 0.0003   | 0.004153 |
| CDC25A    | -1.3647  | 5.00E-05 | 0.000967 |
| TTC30A    | -1.36479 | 0.0002   | 0.003062 |
| TUBG2     | -1.36499 | 0.0006   | 0.007015 |
| RAP1GAP   | -1.36503 | 0.0001   | 0.001745 |
| PLCXD1    | -1.36513 | 0.00185  | 0.016374 |
| EPDR1     | -1.36696 | 0.00015  | 0.002431 |
| RRM2      | -1.36786 | 0.0001   | 0.001745 |
| DNLZ      | -1.36894 | 0.0037   | 0.026819 |
| DGCR6     | -1.36971 | 0.00585  | 0.037553 |
| FGL1      | -1.37103 | 0.00125  | 0.012208 |
| CHST1     | -1.37303 | 0.00425  | 0.029666 |
| TSPO      | -1.37449 | 0.00135  | 0.012838 |
| NKAIN1    | -1.37459 | 0.0037   | 0.026819 |
| LRRC16B   | -1.37502 | 0.00175  | 0.015698 |
| IGSF8     | -1.3751  | 0.00065  | 0.007427 |
| STBD1     | -1.37617 | 0.0002   | 0.003062 |
| GLTPD1    | -1.37936 | 0.0007   | 0.007858 |
| KIAA0319  | -1.38    | 5.00E-05 | 0.000967 |
| DHRS4L1   | -1.38036 | 0.00655  | 0.040923 |
| PHF15     | -1.38313 | 5.00E-05 | 0.000967 |
| FAM102A   | -1.3836  | 0.0003   | 0.004153 |
| TWIST1    | -1.38449 | 0.00605  | 0.038539 |
| TOB1      | -1.38728 | 5.00E-05 | 0.000967 |
| AMBIP     | -1.38865 | 0.00175  | 0.015698 |
| PPP1R3E   | -1.38883 | 0.0003   | 0.004153 |
| CDR2L     | -1.39012 | 0.0002   | 0.003062 |

|           |          |          |          |
|-----------|----------|----------|----------|
| MEX3B     | -1.39099 | 0.00055  | 0.006573 |
| HTATSF1P2 | -1.39319 | 0.0001   | 0.001745 |
| MRPL12    | -1.39378 | 0.00025  | 0.003659 |
| ASIC5     | -1.39414 | 0.00265  | 0.021074 |
| CABYR     | -1.39422 | 0.0003   | 0.004153 |
| C1orf220  | -1.39447 | 0.0005   | 0.006117 |
| CYP4F11   | -1.39608 | 5.00E-05 | 0.000967 |
| LOC150381 | -1.39696 | 0.0023   | 0.019134 |
| CBX4      | -1.39734 | 5.00E-05 | 0.000967 |
| GCLM      | -1.39738 | 0.0001   | 0.001745 |
| SEC14L4   | -1.39912 | 0.00055  | 0.006573 |
| ALDH1L2   | -1.39935 | 0.0004   | 0.005167 |
| RAB3IL1   | -1.40174 | 0.0003   | 0.004153 |
| ANKS4B    | -1.40179 | 0.00065  | 0.007427 |
| LOC440894 | -1.40508 | 0.00075  | 0.008257 |
| PTCD2     | -1.40717 | 0.0003   | 0.004153 |
| ARHGEF39  | -1.40753 | 0.0002   | 0.003062 |
| FXYD2     | -1.40792 | 0.0005   | 0.006117 |
| SYBU      | -1.40955 | 5.00E-05 | 0.000967 |
| TTLL12    | -1.40972 | 0.00045  | 0.005638 |
| NOL3      | -1.40994 | 0.00845  | 0.049135 |
| OSR2      | -1.41046 | 0.0008   | 0.008653 |
| GALNT12   | -1.41173 | 0.0011   | 0.011035 |
| G6PC3     | -1.41385 | 0.0003   | 0.004153 |
| C1orf106  | -1.41414 | 0.0001   | 0.001745 |
| SPDEF     | -1.41433 | 0.0018   | 0.016069 |
| SKIDA1    | -1.41467 | 0.0003   | 0.004153 |
| LOC348761 | -1.41613 | 0.00205  | 0.017591 |
| CARNS1    | -1.417   | 0.0035   | 0.025785 |
| NIPSNAP3B | -1.41859 | 0.0052   | 0.034431 |
| ZNF488    | -1.41882 | 0.0001   | 0.001745 |
| GALK1     | -1.41885 | 0.0003   | 0.004153 |
| PARD6A    | -1.42049 | 0.0042   | 0.029379 |
| CTBP1-AS1 | -1.42138 | 0.0002   | 0.003062 |
| C5        | -1.42263 | 0.0002   | 0.003062 |
| CA7       | -1.42274 | 0.0073   | 0.044132 |
| SLC45A1   | -1.4236  | 0.0011   | 0.011035 |
| SRD5A1    | -1.42476 | 0.0004   | 0.005167 |
| CAT       | -1.42588 | 0.00015  | 0.002431 |
| SGK2      | -1.42603 | 0.0002   | 0.003062 |
| CCNJL     | -1.42762 | 5.00E-05 | 0.000967 |
| ZNF775    | -1.42801 | 0.00145  | 0.01361  |
| ZBTB7B    | -1.42887 | 0.0002   | 0.003062 |
| CPOX      | -1.42903 | 0.0001   | 0.001745 |
| GM2A      | -1.43076 | 0.00015  | 0.002431 |
| FAM111B   | -1.43241 | 0.0006   | 0.007015 |
| F7        | -1.43257 | 0.0011   | 0.011035 |
| SLC1A4    | -1.43416 | 5.00E-05 | 0.000967 |
| ZNF48     | -1.43547 | 0.00015  | 0.002431 |

|           |          |          |          |
|-----------|----------|----------|----------|
| ADD2      | -1.43815 | 5.00E-05 | 0.000967 |
| MAMSTR    | -1.43833 | 0.00175  | 0.015698 |
| CDX2      | -1.44005 | 0.00285  | 0.022187 |
| CTDSPL    | -1.44047 | 0.0004   | 0.005167 |
| SLC17A3   | -1.44169 | 0.0048   | 0.032482 |
| GAS2L1    | -1.4424  | 0.00075  | 0.008257 |
| NTHL1     | -1.44431 | 0.0007   | 0.007858 |
| C1orf74   | -1.44444 | 0.00045  | 0.005638 |
| LOC151009 | -1.44449 | 0.0066   | 0.041051 |
| PSD4      | -1.44529 | 0.00045  | 0.005638 |
| CTAGE7P   | -1.44742 | 0.00195  | 0.016979 |
| NEIL3     | -1.4477  | 0.0001   | 0.001745 |
| C2orf72   | -1.44771 | 0.0003   | 0.004153 |
| LLGL2     | -1.44774 | 0.00125  | 0.012208 |
| HEXIM2    | -1.44848 | 0.00055  | 0.006573 |
| RAB20     | -1.44995 | 0.0007   | 0.007858 |
| WDR16     | -1.45029 | 0.00075  | 0.008257 |
| TMEM161A  | -1.45488 | 0.00065  | 0.007427 |
| OSR1      | -1.45739 | 0.0005   | 0.006117 |
| C3orf72   | -1.45852 | 0.00055  | 0.006573 |
| RBFA      | -1.45892 | 5.00E-05 | 0.000967 |
| FOXD2-AS1 | -1.4624  | 0.00015  | 0.002431 |
| TUBB      | -1.46273 | 5.00E-05 | 0.000967 |
| S1PR5     | -1.46279 | 0.001    | 0.010186 |
| B3GALT6   | -1.46378 | 0.00015  | 0.002431 |
| TRIM16L   | -1.46609 | 5.00E-05 | 0.000967 |
| TIGD5     | -1.46779 | 0.00025  | 0.003659 |
| MRPS34    | -1.46796 | 0.0003   | 0.004153 |
| SEL1L3    | -1.4699  | 5.00E-05 | 0.000967 |
| HOXB13    | -1.47208 | 0.00035  | 0.004678 |
| FGD3      | -1.47807 | 0.00235  | 0.019365 |
| C22orf29  | -1.47851 | 5.00E-05 | 0.000967 |
| PLEKHH3   | -1.47925 | 0.0004   | 0.005167 |
| PARM1     | -1.48051 | 0.0017   | 0.015408 |
| PLEKHF1   | -1.48137 | 0.0002   | 0.003062 |
| KCTD15    | -1.48302 | 5.00E-05 | 0.000967 |
| XK        | -1.48358 | 0.0004   | 0.005167 |
| TCEAL8    | -1.48566 | 0.0006   | 0.007015 |
| TNFRSF1A  | -1.48569 | 5.00E-05 | 0.000967 |
| LINC00086 | -1.4859  | 0.00265  | 0.021074 |
| MCM5      | -1.48793 | 0.00015  | 0.002431 |
| ZNF30     | -1.48973 | 0.0003   | 0.004153 |
| FEN1      | -1.48983 | 5.00E-05 | 0.000967 |
| ZNF526    | -1.49008 | 5.00E-05 | 0.000967 |
| GCNT3     | -1.49032 | 5.00E-05 | 0.000967 |
| FLJ44511  | -1.49035 | 0.00075  | 0.008257 |
| PREB      | -1.49094 | 0.0003   | 0.004153 |
| TXNRD1    | -1.49137 | 5.00E-05 | 0.000967 |
| FAM20C    | -1.49264 | 0.0002   | 0.003062 |

|              |          |          |          |
|--------------|----------|----------|----------|
| SDR42E1      | -1.4929  | 0.00085  | 0.009052 |
| USP51        | -1.49656 | 5.00E-05 | 0.000967 |
| CENPI        | -1.49745 | 0.0004   | 0.005167 |
| MCIN         | -1.50097 | 0.00055  | 0.006573 |
| ZNF786       | -1.50144 | 5.00E-05 | 0.000967 |
| ASAH2B       | -1.50152 | 0.0048   | 0.032482 |
| PALM3        | -1.5017  | 0.0066   | 0.041051 |
| SLC48A1      | -1.50183 | 0.0047   | 0.031987 |
| AP3M2        | -1.50259 | 5.00E-05 | 0.000967 |
| IL1RAPL2     | -1.50337 | 0.0051   | 0.033918 |
| KLF13        | -1.50351 | 0.0001   | 0.001745 |
| SVIP         | -1.5045  | 0.00025  | 0.003659 |
| C15orf39     | -1.50453 | 0.0001   | 0.001745 |
| RERG         | -1.50617 | 0.0013   | 0.01252  |
| ZNF396       | -1.50646 | 0.00165  | 0.015053 |
| TMEM246      | -1.51081 | 5.00E-05 | 0.000967 |
| RAB40B       | -1.51124 | 0.0003   | 0.004153 |
| MNX1         | -1.51147 | 0.0002   | 0.003062 |
| HTR1D        | -1.51209 | 0.00015  | 0.002431 |
| RCAN3        | -1.51691 | 0.0001   | 0.001745 |
| SPTBN4       | -1.51902 | 0.00295  | 0.022658 |
| ZNF517       | -1.52112 | 0.00025  | 0.003659 |
| C17orf70     | -1.52201 | 0.0001   | 0.001745 |
| LOC158572    | -1.52206 | 0.0008   | 0.008653 |
| ZBTB14       | -1.5222  | 5.00E-05 | 0.000967 |
| C10orf35     | -1.52248 | 0.0002   | 0.003062 |
| SPC24        | -1.52291 | 0.00065  | 0.007427 |
| TMEM177      | -1.52303 | 5.00E-05 | 0.000967 |
| GLTPD2       | -1.52462 | 0.00315  | 0.023852 |
| C9orf142     | -1.52498 | 0.0008   | 0.008653 |
| SLC52A2      | -1.52523 | 0.0002   | 0.003062 |
| VPS37D       | -1.52643 | 0.0006   | 0.007015 |
| PRDM13       | -1.52798 | 0.0004   | 0.005167 |
| LRRC20       | -1.52851 | 0.00015  | 0.002431 |
| CDCA3        | -1.52953 | 5.00E-05 | 0.000967 |
| SLC29A3      | -1.52967 | 5.00E-05 | 0.000967 |
| FRAT2        | -1.53153 | 5.00E-05 | 0.000967 |
| LOC100129917 | -1.53247 | 0.00205  | 0.017591 |
| SLC27A2      | -1.5367  | 0.00025  | 0.003659 |
| TTLL7        | -1.53736 | 0.0014   | 0.013185 |
| THBS3        | -1.53757 | 0.00015  | 0.002431 |
| NKX2-5       | -1.53773 | 0.00035  | 0.004678 |
| SKP2         | -1.53902 | 0.00045  | 0.005638 |
| LOC388906    | -1.53922 | 0.0009   | 0.009427 |
| GPT          | -1.5409  | 0.001    | 0.010186 |
| UNG          | -1.54247 | 5.00E-05 | 0.000967 |
| ACSBG2       | -1.54372 | 0.00335  | 0.024946 |
| PELI3        | -1.54461 | 5.00E-05 | 0.000967 |
| TTLL6        | -1.54753 | 0.0005   | 0.006117 |

|              |          |          |          |
|--------------|----------|----------|----------|
| AMER1        | -1.54837 | 5.00E-05 | 0.000967 |
| RTKN         | -1.54926 | 0.0001   | 0.001745 |
| LBH          | -1.54993 | 5.00E-05 | 0.000967 |
| C11orf45     | -1.55453 | 0.00115  | 0.011454 |
| TRIB3        | -1.55609 | 5.00E-05 | 0.000967 |
| HEIH         | -1.55642 | 0.00045  | 0.005638 |
| NR0B1        | -1.55656 | 5.00E-05 | 0.000967 |
| NHLRC3       | -1.55884 | 0.0003   | 0.004153 |
| FUOM         | -1.56015 | 0.002    | 0.017269 |
| LOC100507032 | -1.56025 | 5.00E-05 | 0.000967 |
| GPR135       | -1.56133 | 0.00035  | 0.004678 |
| IMP3         | -1.56281 | 5.00E-05 | 0.000967 |
| CCDC87       | -1.56437 | 0.00025  | 0.003659 |
| AMACR        | -1.56773 | 0.0008   | 0.008653 |
| C11orf92     | -1.57083 | 0.0013   | 0.01252  |
| TMEM102      | -1.57244 | 0.0008   | 0.008653 |
| C21orf67     | -1.57288 | 0.0003   | 0.004153 |
| STOX2        | -1.5747  | 5.00E-05 | 0.000967 |
| NME4         | -1.575   | 5.00E-05 | 0.000967 |
| ITGAD        | -1.57563 | 0.0008   | 0.008653 |
| RMI2         | -1.57612 | 0.00045  | 0.005638 |
| EPHX1        | -1.57644 | 5.00E-05 | 0.000967 |
| UBL4A        | -1.57752 | 5.00E-05 | 0.000967 |
| SRD5A1P1     | -1.57922 | 0.00375  | 0.027122 |
| FAM86EP      | -1.57986 | 5.00E-05 | 0.000967 |
| SIRPB1       | -1.58002 | 0.00035  | 0.004678 |
| TMEM53       | -1.5814  | 0.00035  | 0.004678 |
| TM4SF20      | -1.58204 | 0.0001   | 0.001745 |
| CLIC3        | -1.58464 | 0.00505  | 0.033693 |
| SFXN2        | -1.58572 | 0.0001   | 0.001745 |
| ABCC2        | -1.58706 | 5.00E-05 | 0.000967 |
| CLGN         | -1.58904 | 0.00055  | 0.006573 |
| ST6GALNAC4   | -1.5891  | 0.00035  | 0.004678 |
| CRIP2        | -1.58979 | 0.00135  | 0.012838 |
| PGD          | -1.59007 | 5.00E-05 | 0.000967 |
| NEURL1B      | -1.59021 | 0.00015  | 0.002431 |
| FIGNL1       | -1.59177 | 5.00E-05 | 0.000967 |
| GPC1         | -1.59213 | 5.00E-05 | 0.000967 |
| C19orf48     | -1.59574 | 5.00E-05 | 0.000967 |
| DNAJB9       | -1.59638 | 0.0003   | 0.004153 |
| HPS6         | -1.59689 | 5.00E-05 | 0.000967 |
| THEM6        | -1.59765 | 5.00E-05 | 0.000967 |
| PRR5         | -1.60192 | 0.0077   | 0.046014 |
| IDH1         | -1.60239 | 5.00E-05 | 0.000967 |
| TMEM139      | -1.60559 | 0.0002   | 0.003062 |
| MAGEH1       | -1.60706 | 5.00E-05 | 0.000967 |
| FAM217B      | -1.61006 | 0.00065  | 0.007427 |
| ZNF792       | -1.61088 | 5.00E-05 | 0.000967 |
| ATP6V0E2     | -1.61184 | 0.00225  | 0.01885  |

|           |          |          |          |
|-----------|----------|----------|----------|
| KBTBD7    | -1.61209 | 5.00E-05 | 0.000967 |
| C9orf117  | -1.61323 | 0.00235  | 0.019365 |
| DEFB1     | -1.61349 | 0.00825  | 0.048311 |
| ADCK2     | -1.61449 | 5.00E-05 | 0.000967 |
| PDGFB     | -1.61608 | 0.0001   | 0.001745 |
| BATF3     | -1.6174  | 5.00E-05 | 0.000967 |
| SYTL1     | -1.61804 | 0.0034   | 0.025194 |
| TUSC1     | -1.61957 | 0.00015  | 0.002431 |
| TP53I11   | -1.62024 | 5.00E-05 | 0.000967 |
| PGP       | -1.62204 | 5.00E-05 | 0.000967 |
| UNKL      | -1.62311 | 0.0001   | 0.001745 |
| PYCR1     | -1.62559 | 5.00E-05 | 0.000967 |
| RIMBP3    | -1.62598 | 0.00035  | 0.004678 |
| RPUSD1    | -1.62804 | 5.00E-05 | 0.000967 |
| HILPDA    | -1.62845 | 5.00E-05 | 0.000967 |
| PSRC1     | -1.62954 | 5.00E-05 | 0.000967 |
| CAMKK1    | -1.63116 | 5.00E-05 | 0.000967 |
| PIM1      | -1.63136 | 5.00E-05 | 0.000967 |
| SOX12     | -1.63254 | 5.00E-05 | 0.000967 |
| FGFR3     | -1.63305 | 0.0002   | 0.003062 |
| KCTD17    | -1.63532 | 0.0003   | 0.004153 |
| C16orf59  | -1.63556 | 0.0003   | 0.004153 |
| RAB3A     | -1.63837 | 0.00235  | 0.019365 |
| KLHL31    | -1.63871 | 5.00E-05 | 0.000967 |
| NME3      | -1.64003 | 0.0004   | 0.005167 |
| CKAP4     | -1.64022 | 5.00E-05 | 0.000967 |
| NUDT18    | -1.64026 | 5.00E-05 | 0.000967 |
| GATA3-AS1 | -1.64175 | 0.00315  | 0.023852 |
| ABHD4     | -1.64183 | 5.00E-05 | 0.000967 |
| SNX33     | -1.6435  | 5.00E-05 | 0.000967 |
| RIBC2     | -1.65177 | 0.0002   | 0.003062 |
| B4GALNT1  | -1.65314 | 5.00E-05 | 0.000967 |
| PCSK9     | -1.65688 | 5.00E-05 | 0.000967 |
| LINC00516 | -1.65913 | 0.0006   | 0.007015 |
| CPLX2     | -1.66019 | 5.00E-05 | 0.000967 |
| P2RY6     | -1.66315 | 0.00015  | 0.002431 |
| FGF19     | -1.66323 | 0.00265  | 0.021074 |
| SNTB1     | -1.66378 | 5.00E-05 | 0.000967 |
| USH1C     | -1.66528 | 0.0002   | 0.003062 |
| SLC9A3R2  | -1.6653  | 5.00E-05 | 0.000967 |
| RPP25     | -1.66675 | 5.00E-05 | 0.000967 |
| THYN1     | -1.6697  | 0.0003   | 0.004153 |
| DCLRE1B   | -1.67012 | 5.00E-05 | 0.000967 |
| KCNK5     | -1.67903 | 5.00E-05 | 0.000967 |
| HSF2BP    | -1.67924 | 0.00615  | 0.039026 |
| HS3ST6    | -1.67938 | 0.00095  | 0.009766 |
| ALDH1A1   | -1.67946 | 5.00E-05 | 0.000967 |
| C9orf69   | -1.67968 | 5.00E-05 | 0.000967 |
| FAM127C   | -1.68166 | 0.00095  | 0.009766 |

|            |          |          |          |
|------------|----------|----------|----------|
| ZBTB12     | -1.68212 | 0.0042   | 0.029379 |
| VAV3       | -1.68227 | 5.00E-05 | 0.000967 |
| E2F8       | -1.68325 | 5.00E-05 | 0.000967 |
| CRIP1      | -1.68357 | 5.00E-05 | 0.000967 |
| CYP4F2     | -1.68375 | 0.0014   | 0.013185 |
| DUSP23     | -1.68917 | 5.00E-05 | 0.000967 |
| SLC29A4    | -1.693   | 0.00025  | 0.003659 |
| SLC7A7     | -1.6939  | 5.00E-05 | 0.000967 |
| OCEL1      | -1.6962  | 0.00045  | 0.005638 |
| NUGGC      | -1.70004 | 0.0004   | 0.005167 |
| ANKRD9     | -1.70589 | 0.0005   | 0.006117 |
| CDCA7      | -1.70598 | 5.00E-05 | 0.000967 |
| S100P      | -1.71189 | 5.00E-05 | 0.000967 |
| AKNA       | -1.7127  | 5.00E-05 | 0.000967 |
| TST        | -1.71448 | 0.0009   | 0.009427 |
| CLDND2     | -1.71545 | 0.00095  | 0.009766 |
| ALDH1B1    | -1.71589 | 5.00E-05 | 0.000967 |
| APOH       | -1.71611 | 0.0008   | 0.008653 |
| CBR1       | -1.71677 | 5.00E-05 | 0.000967 |
| GPNMB      | -1.71716 | 0.00055  | 0.006573 |
| DHRS13     | -1.72237 | 5.00E-05 | 0.000967 |
| LOC257396  | -1.72754 | 5.00E-05 | 0.000967 |
| PFN4       | -1.7301  | 0.0029   | 0.022408 |
| ZNF232     | -1.73383 | 5.00E-05 | 0.000967 |
| IDH2       | -1.73631 | 0.00015  | 0.002431 |
| C15orf55   | -1.73814 | 0.00035  | 0.004678 |
| CLEC11A    | -1.74353 | 0.00125  | 0.012208 |
| C1orf233   | -1.7478  | 0.00055  | 0.006573 |
| CENPM      | -1.75297 | 5.00E-05 | 0.000967 |
| PRR15      | -1.75671 | 0.00165  | 0.015053 |
| KRT4       | -1.75773 | 5.00E-05 | 0.000967 |
| E2F1       | -1.77364 | 5.00E-05 | 0.000967 |
| SLC7A5     | -1.7746  | 5.00E-05 | 0.000967 |
| RNASET2    | -1.77565 | 0.0016   | 0.014734 |
| RGS14      | -1.77713 | 0.0002   | 0.003062 |
| SPP1       | -1.77936 | 5.00E-05 | 0.000967 |
| FANCF      | -1.77951 | 5.00E-05 | 0.000967 |
| SCRT2      | -1.78084 | 0.00085  | 0.009052 |
| ANXA13     | -1.78263 | 0.0005   | 0.006117 |
| CORO2A     | -1.78679 | 5.00E-05 | 0.000967 |
| WFIKKN1    | -1.78682 | 0.001    | 0.010186 |
| KCNC4      | -1.78711 | 5.00E-05 | 0.000967 |
| NINJ1      | -1.78726 | 5.00E-05 | 0.000967 |
| HSPA12B    | -1.78853 | 5.00E-05 | 0.000967 |
| FLVCR1-AS1 | -1.78991 | 0.00035  | 0.004678 |
| CEBPA-AS1  | -1.79145 | 5.00E-05 | 0.000967 |
| DEPTOR     | -1.79412 | 0.0003   | 0.004153 |
| RPL13P5    | -1.79426 | 5.00E-05 | 0.000967 |
| PAQR4      | -1.79565 | 0.0002   | 0.003062 |



|            |          |          |          |
|------------|----------|----------|----------|
| ID1        | -1.80178 | 5.00E-05 | 0.000967 |
| PNMA2      | -1.80926 | 5.00E-05 | 0.000967 |
| C1QTNF6    | -1.81092 | 5.00E-05 | 0.000967 |
| LOC440518  | -1.81125 | 0.0001   | 0.001745 |
| ZBTB47     | -1.8117  | 5.00E-05 | 0.000967 |
| FAM78A     | -1.8131  | 5.00E-05 | 0.000967 |
| ZBTB32     | -1.81797 | 5.00E-05 | 0.000967 |
| HNF4A      | -1.82436 | 5.00E-05 | 0.000967 |
| ABCB6      | -1.83151 | 5.00E-05 | 0.000967 |
| THNSL1     | -1.8325  | 5.00E-05 | 0.000967 |
| MIRLET7BHG | -1.83405 | 5.00E-05 | 0.000967 |
| AGR2       | -1.83571 | 5.00E-05 | 0.000967 |
| PRSS16     | -1.83614 | 0.0001   | 0.001745 |
| RAB37      | -1.839   | 5.00E-05 | 0.000967 |
| RAB38      | -1.84257 | 0.0001   | 0.001745 |
| FZD2       | -1.84564 | 5.00E-05 | 0.000967 |
| C9orf50    | -1.85444 | 0.0028   | 0.021921 |
| MIR210HG   | -1.85479 | 5.00E-05 | 0.000967 |
| CCND3      | -1.85904 | 5.00E-05 | 0.000967 |
| ZNF688     | -1.86036 | 5.00E-05 | 0.000967 |
| C17orf82   | -1.86133 | 0.0012   | 0.011824 |
| C10orf91   | -1.86476 | 0.0005   | 0.006117 |
| CEBPA      | -1.86696 | 5.00E-05 | 0.000967 |
| CBX2       | -1.86765 | 0.00015  | 0.002431 |
| A4GNT      | -1.8763  | 0.00045  | 0.005638 |
| CXXC5      | -1.87877 | 5.00E-05 | 0.000967 |
| CAPN5      | -1.87981 | 5.00E-05 | 0.000967 |
| HJURP      | -1.88251 | 5.00E-05 | 0.000967 |
| ABHD15     | -1.88407 | 5.00E-05 | 0.000967 |
| GJD3       | -1.89285 | 5.00E-05 | 0.000967 |
| JMJD4      | -1.89351 | 0.00465  | 0.031738 |
| FAM86C2P   | -1.89506 | 5.00E-05 | 0.000967 |
| THAP8      | -1.89754 | 5.00E-05 | 0.000967 |
| DPYSL2     | -1.89806 | 5.00E-05 | 0.000967 |
| SLC16A13   | -1.8982  | 0.0001   | 0.001745 |
| NKG7       | -1.90342 | 0.00795  | 0.046985 |
| KAZALD1    | -1.90358 | 5.00E-05 | 0.000967 |
| MAFG-AS1   | -1.90359 | 5.00E-05 | 0.000967 |
| PAQR9      | -1.90391 | 5.00E-05 | 0.000967 |
| INHBB      | -1.9086  | 5.00E-05 | 0.000967 |
| ZDHHC8P1   | -1.91265 | 5.00E-05 | 0.000967 |
| NS3BP      | -1.91788 | 0.0001   | 0.001745 |
| E2F2       | -1.92089 | 5.00E-05 | 0.000967 |
| DDIT4L     | -1.92126 | 5.00E-05 | 0.000967 |
| RTN4R      | -1.92727 | 0.0003   | 0.004153 |
| SMKR1      | -1.93354 | 0.00035  | 0.004678 |
| ACP5       | -1.93729 | 0.00025  | 0.003659 |
| ZFP69B     | -1.93919 | 5.00E-05 | 0.000967 |
| KCNS3      | -1.94149 | 0.0013   | 0.01252  |

|              |          |          |          |
|--------------|----------|----------|----------|
| SCTR         | -1.94783 | 0.0006   | 0.007015 |
| KRT82        | -1.95046 | 0.00055  | 0.006573 |
| MANSC1       | -1.95135 | 5.00E-05 | 0.000967 |
| SRXN1        | -1.95138 | 5.00E-05 | 0.000967 |
| MBLAC2       | -1.96263 | 5.00E-05 | 0.000967 |
| SLC26A1      | -1.9631  | 0.00075  | 0.008257 |
| F2RL2        | -1.96336 | 5.00E-05 | 0.000967 |
| TSKU         | -1.97016 | 5.00E-05 | 0.000967 |
| C19orf60     | -1.97101 | 0.00015  | 0.002431 |
| LINC00858    | -1.97339 | 5.00E-05 | 0.000967 |
| SAMD13       | -1.97789 | 0.00535  | 0.035214 |
| AKR1C3       | -1.97937 | 5.00E-05 | 0.000967 |
| LOC101101776 | -1.97967 | 0.0001   | 0.001745 |
| CD40LG       | -1.99981 | 0.00015  | 0.002431 |
| AKR1C1       | -2.00819 | 5.00E-05 | 0.000967 |
| CDH1         | -2.0205  | 5.00E-05 | 0.000967 |
| FGG          | -2.03029 | 5.00E-05 | 0.000967 |
| PNMA6C       | -2.03766 | 0.00015  | 0.002431 |
| MPST         | -2.03872 | 0.001    | 0.010186 |
| ABCA17P      | -2.04321 | 5.00E-05 | 0.000967 |
| GPR162       | -2.04949 | 5.00E-05 | 0.000967 |
| UFSP1        | -2.05239 | 5.00E-05 | 0.000967 |
| B3GNT1       | -2.05467 | 5.00E-05 | 0.000967 |
| ZNF467       | -2.06864 | 0.00125  | 0.012208 |
| RASSF7       | -2.06928 | 5.00E-05 | 0.000967 |
| AKR1C4       | -2.06954 | 5.00E-05 | 0.000967 |
| HNF1A-AS1    | -2.07078 | 5.00E-05 | 0.000967 |
| LINC00235    | -2.07936 | 5.00E-05 | 0.000967 |
| CRLF1        | -2.08041 | 0.0001   | 0.001745 |
| KHK          | -2.08072 | 0.0031   | 0.023602 |
| LOC728537    | -2.08298 | 0.0001   | 0.001745 |
| HLA-DMB      | -2.08753 | 0.0002   | 0.003062 |
| MSC          | -2.09568 | 5.00E-05 | 0.000967 |
| CSTL1        | -2.12022 | 0.00785  | 0.046626 |
| LHX9         | -2.12145 | 0.0001   | 0.001745 |
| MARVELD1     | -2.13719 | 5.00E-05 | 0.000967 |
| DISP2        | -2.14347 | 5.00E-05 | 0.000967 |
| LOC645249    | -2.14386 | 5.00E-05 | 0.000967 |
| LIPT2        | -2.16165 | 5.00E-05 | 0.000967 |
| SSR4P1       | -2.16355 | 0.0003   | 0.004153 |
| GPRIN2       | -2.17526 | 5.00E-05 | 0.000967 |
| TNFRSF13C    | -2.1773  | 0.0054   | 0.035445 |
| LOC554206    | -2.19167 | 0.00025  | 0.003659 |
| FGA          | -2.2224  | 5.00E-05 | 0.000967 |
| LOC148696    | -2.23235 | 5.00E-05 | 0.000967 |
| FAM194A      | -2.23749 | 5.00E-05 | 0.000967 |
| EPN3         | -2.24433 | 5.00E-05 | 0.000967 |
| KRTAP4-1     | -2.25754 | 0.00195  | 0.016979 |
| GPR20        | -2.2844  | 5.00E-05 | 0.000967 |

|              |          |          |          |
|--------------|----------|----------|----------|
| CYP4F12      | -2.28547 | 5.00E-05 | 0.000967 |
| CPN1         | -2.29168 | 0.00035  | 0.004678 |
| AKR1C2       | -2.29206 | 5.00E-05 | 0.000967 |
| NT5M         | -2.29349 | 5.00E-05 | 0.000967 |
| NTN3         | -2.30378 | 0.00045  | 0.005638 |
| C12orf68     | -2.33257 | 5.00E-05 | 0.000967 |
| TMEM52       | -2.34252 | 0.00795  | 0.046985 |
| EMILIN1      | -2.349   | 5.00E-05 | 0.000967 |
| KIF12        | -2.35036 | 5.00E-05 | 0.000967 |
| METTL7B      | -2.36774 | 5.00E-05 | 0.000967 |
| RNASE4       | -2.38495 | 0.0002   | 0.003062 |
| USP29        | -2.38975 | 5.00E-05 | 0.000967 |
| CYP4F3       | -2.39757 | 5.00E-05 | 0.000967 |
| ANG          | -2.42336 | 0.0026   | 0.020846 |
| NUPR1        | -2.44519 | 5.00E-05 | 0.000967 |
| OSGIN1       | -2.49036 | 5.00E-05 | 0.000967 |
| SFRP4        | -2.59932 | 5.00E-05 | 0.000967 |
| ASCL5        | -2.6103  | 0.00205  | 0.017591 |
| SLC40A1      | -2.64261 | 5.00E-05 | 0.000967 |
| TMEM37       | -2.71348 | 5.00E-05 | 0.000967 |
| SHH          | -2.71967 | 5.00E-05 | 0.000967 |
| HMOX1        | -2.7257  | 5.00E-05 | 0.000967 |
| LOC100506229 | -2.74899 | 5.00E-05 | 0.000967 |
| ATOH8        | -2.78861 | 5.00E-05 | 0.000967 |
| KLHDC7A      | -3.08352 | 5.00E-05 | 0.000967 |

<sup>(a)</sup> probability of your false positive

<sup>(b)</sup> adjusted p-values found using an optimised False Discovery Rate (FDR) approach.

**Table S2. Differentially expressed genes in BTV8ΔNS4- compared to mock-infected A549 cells.**

| Gene symbol | Fold change (log2) | P-value <sup>(a)</sup> | Q-value <sup>(b)</sup> (<0.05) |
|-------------|--------------------|------------------------|--------------------------------|
| CH25H       | 7.15317            | 0.0054                 | 0.040509                       |
| IFNB1       | 7.09201            | 5.00E-05               | 0.001089                       |
| IFNL1       | 6.72284            | 5.00E-05               | 0.001089                       |
| IFNL2       | 6.50831            | 5.00E-05               | 0.001089                       |
| MX1         | 6.46909            | 5.00E-05               | 0.001089                       |
| IFNL3       | 6.45399            | 5.00E-05               | 0.001089                       |
| OASL        | 6.45306            | 5.00E-05               | 0.001089                       |
| IFIT2       | 6.40381            | 5.00E-05               | 0.001089                       |
| RSAD2       | 6.29918            | 5.00E-05               | 0.001089                       |
| IFIT1       | 6.24563            | 5.00E-05               | 0.001089                       |
| CXCL11      | 6.16231            | 0.00085                | 0.010312                       |
| IFIT3       | 6.14966            | 5.00E-05               | 0.001089                       |
| CMPK2       | 6.00184            | 5.00E-05               | 0.001089                       |
| IFI44       | 5.98641            | 5.00E-05               | 0.001089                       |
| MX2         | 5.94949            | 5.00E-05               | 0.001089                       |

|           |         |          |          |
|-----------|---------|----------|----------|
| CCR4      | 5.81579 | 5.00E-05 | 0.001089 |
| IFI27     | 5.63631 | 5.00E-05 | 0.001089 |
| DDX58     | 5.59636 | 5.00E-05 | 0.001089 |
| OAS2      | 5.52776 | 5.00E-05 | 0.001089 |
| IFIH1     | 5.50756 | 5.00E-05 | 0.001089 |
| CA1       | 5.49294 | 5.00E-05 | 0.001089 |
| ISG15     | 5.44795 | 5.00E-05 | 0.001089 |
| FOSB      | 5.44563 | 5.00E-05 | 0.001089 |
| EGR2      | 5.40941 | 5.00E-05 | 0.001089 |
| FOS       | 5.31981 | 5.00E-05 | 0.001089 |
| IL8       | 5.29486 | 5.00E-05 | 0.001089 |
| KLRC2     | 5.20089 | 5.00E-05 | 0.001089 |
| EGR1      | 5.17407 | 0.0001   | 0.001954 |
| SLC1A3    | 5.1674  | 5.00E-05 | 0.001089 |
| EGR4      | 5.15848 | 5.00E-05 | 0.001089 |
| BATF2     | 5.06808 | 5.00E-05 | 0.001089 |
| HERC5     | 5.0189  | 5.00E-05 | 0.001089 |
| IFI6      | 5.01293 | 5.00E-05 | 0.001089 |
| IFNL4     | 4.92876 | 5.00E-05 | 0.001089 |
| ARL14     | 4.92528 | 5.00E-05 | 0.001089 |
| IL1RL1    | 4.89731 | 5.00E-05 | 0.001089 |
| RFPL4A    | 4.85423 | 0.0013   | 0.014165 |
| SAMD9     | 4.84687 | 5.00E-05 | 0.001089 |
| TNFSF4    | 4.81036 | 5.00E-05 | 0.001089 |
| IFITM1    | 4.74284 | 0.0012   | 0.013303 |
| IFI16     | 4.70346 | 5.00E-05 | 0.001089 |
| DDX60     | 4.64623 | 5.00E-05 | 0.001089 |
| CCL5      | 4.60728 | 5.00E-05 | 0.001089 |
| EGR3      | 4.57014 | 5.00E-05 | 0.001089 |
| GBP1      | 4.56184 | 5.00E-05 | 0.001089 |
| PLEKHA4   | 4.45365 | 5.00E-05 | 0.001089 |
| USH1G     | 4.28429 | 5.00E-05 | 0.001089 |
| TRIM22    | 4.28249 | 5.00E-05 | 0.001089 |
| IL6       | 4.28046 | 5.00E-05 | 0.001089 |
| DHX58     | 4.2557  | 5.00E-05 | 0.001089 |
| DDX60L    | 4.19596 | 5.00E-05 | 0.001089 |
| CREB5     | 4.17979 | 5.00E-05 | 0.001089 |
| ALOXE3    | 4.17345 | 5.00E-05 | 0.001089 |
| TYRP1     | 4.16418 | 5.00E-05 | 0.001089 |
| MXD1      | 4.12641 | 5.00E-05 | 0.001089 |
| TRAF1     | 4.10313 | 5.00E-05 | 0.001089 |
| ADH1C     | 4.09581 | 0.0026   | 0.023711 |
| LOC284344 | 4.09324 | 0.00355  | 0.029785 |
| KLRC4     | 4.09282 | 0.0024   | 0.022413 |
| HIST1H1T  | 4.08444 | 5.00E-05 | 0.001089 |
| ZC3HAV1   | 4.06846 | 5.00E-05 | 0.001089 |

|           |         |          |          |
|-----------|---------|----------|----------|
| MC5R      | 4.0662  | 0.00015  | 0.002736 |
| IL32      | 4.04317 | 5.00E-05 | 0.001089 |
| HELZ2     | 4.02699 | 5.00E-05 | 0.001089 |
| IRGM      | 4.0067  | 5.00E-05 | 0.001089 |
| KLRC3     | 4.00329 | 5.00E-05 | 0.001089 |
| ZCCHC12   | 3.9714  | 0.0008   | 0.009825 |
| XAF1      | 3.95484 | 5.00E-05 | 0.001089 |
| GPR50     | 3.9358  | 5.00E-05 | 0.001089 |
| IRF9      | 3.93383 | 5.00E-05 | 0.001089 |
| KDM6B     | 3.93109 | 5.00E-05 | 0.001089 |
| TNFRSF9   | 3.92781 | 5.00E-05 | 0.001089 |
| OAS1      | 3.92679 | 5.00E-05 | 0.001089 |
| ANKRD1    | 3.92282 | 5.00E-05 | 0.001089 |
| MAFF      | 3.88259 | 5.00E-05 | 0.001089 |
| FRG2B     | 3.86752 | 0.00555  | 0.041342 |
| CCDC144NL | 3.85753 | 5.00E-05 | 0.001089 |
| ATF3      | 3.85677 | 5.00E-05 | 0.001089 |
| TNF       | 3.82417 | 5.00E-05 | 0.001089 |
| NFKBIZ    | 3.81291 | 5.00E-05 | 0.001089 |
| JUN       | 3.80519 | 5.00E-05 | 0.001089 |
| DHRS2     | 3.78842 | 5.00E-05 | 0.001089 |
| C20orf195 | 3.78785 | 5.00E-05 | 0.001089 |
| PLA2G4C   | 3.77897 | 5.00E-05 | 0.001089 |
| LOC643201 | 3.75804 | 5.00E-05 | 0.001089 |
| ARL14EPL  | 3.75766 | 0.00045  | 0.006411 |
| PARP9     | 3.74982 | 5.00E-05 | 0.001089 |
| HLA-B     | 3.7451  | 5.00E-05 | 0.001089 |
| DUSP8     | 3.74413 | 0.0036   | 0.030077 |
| RGMA      | 3.72102 | 5.00E-05 | 0.001089 |
| GPR1      | 3.68597 | 5.00E-05 | 0.001089 |
| NPTX2     | 3.68078 | 0.00095  | 0.011119 |
| NID1      | 3.67198 | 5.00E-05 | 0.001089 |
| ITGAM     | 3.66731 | 5.00E-05 | 0.001089 |
| HIST1H2BG | 3.66483 | 5.00E-05 | 0.001089 |
| EFNB2     | 3.66458 | 5.00E-05 | 0.001089 |
| OAS3      | 3.64321 | 5.00E-05 | 0.001089 |
| GBP5      | 3.62176 | 5.00E-05 | 0.001089 |
| IRF1      | 3.60272 | 5.00E-05 | 0.001089 |
| CD83      | 3.55657 | 5.00E-05 | 0.001089 |
| PPP4R4    | 3.52592 | 5.00E-05 | 0.001089 |
| FAM71A    | 3.51333 | 5.00E-05 | 0.001089 |
| SLCO5A1   | 3.49092 | 5.00E-05 | 0.001089 |
| TRANK1    | 3.48645 | 5.00E-05 | 0.001089 |
| CCL20     | 3.47834 | 5.00E-05 | 0.001089 |
| GBP2      | 3.47703 | 5.00E-05 | 0.001089 |
| PLSCR1    | 3.47447 | 5.00E-05 | 0.001089 |

|           |         |          |          |
|-----------|---------|----------|----------|
| DDIT3     | 3.47373 | 5.00E-05 | 0.001089 |
| CXCR4     | 3.44355 | 5.00E-05 | 0.001089 |
| HIST1H3G  | 3.43807 | 5.00E-05 | 0.001089 |
| HSPA6     | 3.4128  | 5.00E-05 | 0.001089 |
| CD274     | 3.41251 | 5.00E-05 | 0.001089 |
| HLA-F     | 3.3983  | 5.00E-05 | 0.001089 |
| PPP1R15A  | 3.39269 | 5.00E-05 | 0.001089 |
| CETP      | 3.39011 | 0.00065  | 0.008431 |
| SAMD9L    | 3.37648 | 5.00E-05 | 0.001089 |
| ACTN2     | 3.37484 | 5.00E-05 | 0.001089 |
| HIST1H2AE | 3.3748  | 5.00E-05 | 0.001089 |
| TEX37     | 3.36575 | 0.0009   | 0.010731 |
| TNFAIP3   | 3.36358 | 5.00E-05 | 0.001089 |
| TNFAIP6   | 3.34146 | 0.0007   | 0.008891 |
| OR2B6     | 3.33299 | 5.00E-05 | 0.001089 |
| DNAH3     | 3.3326  | 0.00065  | 0.008431 |
| STAT2     | 3.32918 | 5.00E-05 | 0.001089 |
| ICAM1     | 3.3243  | 5.00E-05 | 0.001089 |
| NLRC5     | 3.31997 | 5.00E-05 | 0.001089 |
| CCRN4L    | 3.30364 | 5.00E-05 | 0.001089 |
| IL23A     | 3.28716 | 5.00E-05 | 0.001089 |
| HERC6     | 3.27896 | 5.00E-05 | 0.001089 |
| RTP4      | 3.27084 | 0.006    | 0.043714 |
| C6orf58   | 3.26956 | 5.00E-05 | 0.001089 |
| CPA2      | 3.26358 | 0.0015   | 0.015773 |
| SAMHD1    | 3.25601 | 5.00E-05 | 0.001089 |
| TULP2     | 3.2497  | 5.00E-05 | 0.001089 |
| CYLD      | 3.2473  | 5.00E-05 | 0.001089 |
| SP110     | 3.22382 | 5.00E-05 | 0.001089 |
| HIST4H4   | 3.2222  | 5.00E-05 | 0.001089 |
| NR4A3     | 3.20964 | 5.00E-05 | 0.001089 |
| SOD2      | 3.20927 | 5.00E-05 | 0.001089 |
| PARP14    | 3.19316 | 5.00E-05 | 0.001089 |
| FCGR1B    | 3.18241 | 5.00E-05 | 0.001089 |
| HSPA7     | 3.17803 | 5.00E-05 | 0.001089 |
| BIRC3     | 3.17266 | 5.00E-05 | 0.001089 |
| ARID5B    | 3.16888 | 5.00E-05 | 0.001089 |
| HMGCS1    | 3.16545 | 5.00E-05 | 0.001089 |
| IFIT1B    | 3.16319 | 5.00E-05 | 0.001089 |
| STC1      | 3.1595  | 5.00E-05 | 0.001089 |
| KLRC1     | 3.14589 | 0.00125  | 0.013761 |
| SEMA3D    | 3.12829 | 5.00E-05 | 0.001089 |
| FAM46C    | 3.11445 | 5.00E-05 | 0.001089 |
| TAAR3     | 3.09548 | 0.0002   | 0.003428 |
| RHCG      | 3.09319 | 5.00E-05 | 0.001089 |
| DUSP10    | 3.09194 | 5.00E-05 | 0.001089 |

|           |         |          |          |
|-----------|---------|----------|----------|
| GBP3      | 3.08986 | 5.00E-05 | 0.001089 |
| HDAC9     | 3.08617 | 5.00E-05 | 0.001089 |
| IRF7      | 3.07934 | 5.00E-05 | 0.001089 |
| LTB       | 3.07898 | 5.00E-05 | 0.001089 |
| CXCL1     | 3.06428 | 5.00E-05 | 0.001089 |
| SOCS1     | 3.05133 | 5.00E-05 | 0.001089 |
| OR13A1    | 3.04751 | 0.00065  | 0.008431 |
| PTGER4    | 3.0431  | 5.00E-05 | 0.001089 |
| CD163L1   | 3.02422 | 5.00E-05 | 0.001089 |
| NEUROD4   | 3.00582 | 5.00E-05 | 0.001089 |
| CFB       | 3.00552 | 5.00E-05 | 0.001089 |
| N4BP3     | 2.97401 | 5.00E-05 | 0.001089 |
| PDE11A    | 2.95943 | 5.00E-05 | 0.001089 |
| USP18     | 2.94146 | 5.00E-05 | 0.001089 |
| ISG20     | 2.93439 | 5.00E-05 | 0.001089 |
| SELPLG    | 2.92866 | 5.00E-05 | 0.001089 |
| B2M       | 2.92245 | 5.00E-05 | 0.001089 |
| STAT1     | 2.91479 | 5.00E-05 | 0.001089 |
| ZEB2      | 2.91115 | 5.00E-05 | 0.001089 |
| SPATA9    | 2.90458 | 0.0029   | 0.025597 |
| ZNFX1     | 2.90063 | 5.00E-05 | 0.001089 |
| TDRD7     | 2.89935 | 5.00E-05 | 0.001089 |
| LRRC15    | 2.89419 | 5.00E-05 | 0.001089 |
| PTGS2     | 2.89416 | 5.00E-05 | 0.001089 |
| OTUD1     | 2.8906  | 5.00E-05 | 0.001089 |
| PARP10    | 2.88626 | 5.00E-05 | 0.001089 |
| CYR61     | 2.8776  | 5.00E-05 | 0.001089 |
| NR4A1     | 2.87271 | 5.00E-05 | 0.001089 |
| H2AFJ     | 2.86112 | 5.00E-05 | 0.001089 |
| LMO2      | 2.85718 | 5.00E-05 | 0.001089 |
| OR2B2     | 2.85657 | 5.00E-05 | 0.001089 |
| SLC22A1   | 2.85512 | 5.00E-05 | 0.001089 |
| DTX3L     | 2.84697 | 5.00E-05 | 0.001089 |
| FAP       | 2.84298 | 5.00E-05 | 0.001089 |
| MCL1      | 2.84238 | 5.00E-05 | 0.001089 |
| HCAR3     | 2.8375  | 5.00E-05 | 0.001089 |
| PARP12    | 2.8328  | 5.00E-05 | 0.001089 |
| CD200R1   | 2.8249  | 0.0001   | 0.001954 |
| LAMP3     | 2.82444 | 5.00E-05 | 0.001089 |
| C5orf27   | 2.80215 | 5.00E-05 | 0.001089 |
| DSC1      | 2.80035 | 5.00E-05 | 0.001089 |
| HIST2H2BC | 2.78173 | 5.00E-05 | 0.001089 |
| SNAPC1    | 2.78079 | 5.00E-05 | 0.001089 |
| PRDX2     | 2.77762 | 5.00E-05 | 0.001089 |
| UBD       | 2.76809 | 0.0004   | 0.005861 |
| GPR176    | 2.76434 | 5.00E-05 | 0.001089 |

|              |         |          |          |
|--------------|---------|----------|----------|
| ZFP36        | 2.76419 | 5.00E-05 | 0.001089 |
| FAM46A       | 2.75571 | 5.00E-05 | 0.001089 |
| APOL6        | 2.75533 | 5.00E-05 | 0.001089 |
| IFITM3       | 2.75161 | 5.00E-05 | 0.001089 |
| HLA-E        | 2.74928 | 5.00E-05 | 0.001089 |
| KRT17        | 2.74921 | 0.00565  | 0.041892 |
| PMAIP1       | 2.74852 | 5.00E-05 | 0.001089 |
| ZFPM2        | 2.74752 | 5.00E-05 | 0.001089 |
| INHBA        | 2.74218 | 5.00E-05 | 0.001089 |
| TEX14        | 2.74156 | 5.00E-05 | 0.001089 |
| APOL1        | 2.73666 | 5.00E-05 | 0.001089 |
| HLA-H        | 2.72817 | 5.00E-05 | 0.001089 |
| APOL2        | 2.70693 | 5.00E-05 | 0.001089 |
| ZNF80        | 2.7     | 5.00E-05 | 0.001089 |
| DNAJB5       | 2.6994  | 5.00E-05 | 0.001089 |
| VGFB         | 2.69259 | 5.00E-05 | 0.001089 |
| PPP1R1C      | 2.67988 | 5.00E-05 | 0.001089 |
| ADAMTSL4     | 2.64898 | 5.00E-05 | 0.001089 |
| ULBP2        | 2.64691 | 5.00E-05 | 0.001089 |
| TMEM88       | 2.64381 | 5.00E-05 | 0.001089 |
| IL6ST        | 2.6429  | 5.00E-05 | 0.001089 |
| CDH9         | 2.64147 | 5.00E-05 | 0.001089 |
| HDX          | 2.63438 | 5.00E-05 | 0.001089 |
| LOC100507217 | 2.63168 | 5.00E-05 | 0.001089 |
| FREM2        | 2.63111 | 5.00E-05 | 0.001089 |
| ESR1         | 2.62524 | 5.00E-05 | 0.001089 |
| C19orf66     | 2.61581 | 5.00E-05 | 0.001089 |
| ITGA5        | 2.60903 | 5.00E-05 | 0.001089 |
| IFI44L       | 2.60377 | 5.00E-05 | 0.001089 |
| NFKB2        | 2.59888 | 5.00E-05 | 0.001089 |
| HLA-A        | 2.59321 | 5.00E-05 | 0.001089 |
| ADIRF        | 2.58978 | 0.0002   | 0.003428 |
| IL11         | 2.58936 | 5.00E-05 | 0.001089 |
| APOBEC3B     | 2.58875 | 5.00E-05 | 0.001089 |
| LOC339166    | 2.58567 | 5.00E-05 | 0.001089 |
| GPIHBP1      | 2.58433 | 5.00E-05 | 0.001089 |
| GBP4         | 2.58192 | 5.00E-05 | 0.001089 |
| EIF2AK2      | 2.57968 | 5.00E-05 | 0.001089 |
| CTNNA1       | 2.56487 | 5.00E-05 | 0.001089 |
| TRIM21       | 2.55492 | 5.00E-05 | 0.001089 |
| GIF          | 2.55337 | 0.00385  | 0.031636 |
| OTOP2        | 2.55326 | 0.0009   | 0.010731 |
| TAPBPL       | 2.5442  | 0.0071   | 0.049381 |
| TMEM27       | 2.54257 | 5.00E-05 | 0.001089 |
| TTC9B        | 2.54122 | 0.00025  | 0.004092 |
| DLX2         | 2.53425 | 5.00E-05 | 0.001089 |



|           |         |          |          |
|-----------|---------|----------|----------|
| OR1F2P    | 2.52915 | 0.0006   | 0.008024 |
| HIVEP2    | 2.52818 | 5.00E-05 | 0.001089 |
| IL7       | 2.52746 | 5.00E-05 | 0.001089 |
| PTPRH     | 2.52665 | 5.00E-05 | 0.001089 |
| ABL2      | 2.5259  | 5.00E-05 | 0.001089 |
| CMTM2     | 2.51765 | 0.0001   | 0.001954 |
| ZSWIM4    | 2.51381 | 5.00E-05 | 0.001089 |
| MEG9      | 2.50642 | 5.00E-05 | 0.001089 |
| TSPYL2    | 2.50101 | 5.00E-05 | 0.001089 |
| SPAG9     | 2.49418 | 5.00E-05 | 0.001089 |
| CNTN6     | 2.49354 | 0.0001   | 0.001954 |
| PPM1K     | 2.49287 | 5.00E-05 | 0.001089 |
| IGF2      | 2.48941 | 5.00E-05 | 0.001089 |
| IFIT5     | 2.48313 | 5.00E-05 | 0.001089 |
| SP100     | 2.46777 | 5.00E-05 | 0.001089 |
| ART4      | 2.46661 | 5.00E-05 | 0.001089 |
| ARC       | 2.46215 | 5.00E-05 | 0.001089 |
| NCOA7     | 2.45916 | 5.00E-05 | 0.001089 |
| FLJ12334  | 2.45613 | 5.00E-05 | 0.001089 |
| SCN3A     | 2.45384 | 5.00E-05 | 0.001089 |
| CYP1A1    | 2.45104 | 5.00E-05 | 0.001089 |
| NAV3      | 2.45049 | 5.00E-05 | 0.001089 |
| NFKBIE    | 2.44792 | 5.00E-05 | 0.001089 |
| C11orf91  | 2.44202 | 5.00E-05 | 0.001089 |
| OR1F1     | 2.42491 | 5.00E-05 | 0.001089 |
| SEMA3A    | 2.42463 | 5.00E-05 | 0.001089 |
| TBX10     | 2.4187  | 5.00E-05 | 0.001089 |
| AOX1      | 2.41851 | 5.00E-05 | 0.001089 |
| SPRY2     | 2.41423 | 5.00E-05 | 0.001089 |
| DUSP6     | 2.41175 | 5.00E-05 | 0.001089 |
| TAP1      | 2.39958 | 5.00E-05 | 0.001089 |
| LINC00152 | 2.39734 | 5.00E-05 | 0.001089 |
| FOSL1     | 2.39411 | 5.00E-05 | 0.001089 |
| SERTAD1   | 2.39353 | 5.00E-05 | 0.001089 |
| AKAP12    | 2.39238 | 5.00E-05 | 0.001089 |
| TGIF2     | 2.38861 | 0.0002   | 0.003428 |
| BTN2A2    | 2.38586 | 5.00E-05 | 0.001089 |
| ARHGAP40  | 2.38329 | 0.0002   | 0.003428 |
| HCAR2     | 2.38231 | 5.00E-05 | 0.001089 |
| HCP5      | 2.37764 | 5.00E-05 | 0.001089 |
| NUDT8     | 2.37748 | 5.00E-05 | 0.001089 |
| GYPE      | 2.37607 | 0.0017   | 0.017361 |
| KLF6      | 2.37314 | 5.00E-05 | 0.001089 |
| PTCHD2    | 2.37282 | 5.00E-05 | 0.001089 |
| IL10RA    | 2.37094 | 5.00E-05 | 0.001089 |
| HIP1R     | 2.3708  | 5.00E-05 | 0.001089 |

|           |         |          |          |
|-----------|---------|----------|----------|
| CSRNP1    | 2.35651 | 5.00E-05 | 0.001089 |
| FST       | 2.35145 | 5.00E-05 | 0.001089 |
| HOMER1    | 2.34937 | 5.00E-05 | 0.001089 |
| VSTM1     | 2.33651 | 0.00025  | 0.004092 |
| IL31RA    | 2.32823 | 5.00E-05 | 0.001089 |
| DKK1      | 2.32285 | 5.00E-05 | 0.001089 |
| LAMC2     | 2.32085 | 5.00E-05 | 0.001089 |
| H3F3C     | 2.31916 | 5.00E-05 | 0.001089 |
| PHLDA1    | 2.31113 | 5.00E-05 | 0.001089 |
| NBEAP1    | 2.31083 | 0.0027   | 0.024344 |
| TNFSF10   | 2.30863 | 0.0001   | 0.001954 |
| TOP1P1    | 2.3067  | 5.00E-05 | 0.001089 |
| JMJD1C    | 2.30348 | 5.00E-05 | 0.001089 |
| PLCB4     | 2.30158 | 5.00E-05 | 0.001089 |
| ARL5B     | 2.30108 | 5.00E-05 | 0.001089 |
| BCL2A1    | 2.29987 | 5.00E-05 | 0.001089 |
| NFKBIA    | 2.29981 | 5.00E-05 | 0.001089 |
| AADAC     | 2.29756 | 5.00E-05 | 0.001089 |
| FAM53C    | 2.29049 | 5.00E-05 | 0.001089 |
| RELB      | 2.28661 | 5.00E-05 | 0.001089 |
| ERO1LB    | 2.27891 | 5.00E-05 | 0.001089 |
| DHRS9     | 2.27832 | 5.00E-05 | 0.001089 |
| NR1D1     | 2.27358 | 5.00E-05 | 0.001089 |
| PFKFB4    | 2.27347 | 5.00E-05 | 0.001089 |
| MAP1LC3B  | 2.27241 | 5.00E-05 | 0.001089 |
| CREBRF    | 2.26854 | 5.00E-05 | 0.001089 |
| LDLRAD4   | 2.26437 | 5.00E-05 | 0.001089 |
| FAM71F2   | 2.26162 | 5.00E-05 | 0.001089 |
| UBA7      | 2.2584  | 5.00E-05 | 0.001089 |
| LOC646498 | 2.25795 | 0.0031   | 0.026901 |
| C17orf66  | 2.25762 | 5.00E-05 | 0.001089 |
| CYP2J2    | 2.25466 | 0.0029   | 0.025597 |
| ADAMTS19  | 2.25373 | 5.00E-05 | 0.001089 |
| MCTP1     | 2.24708 | 5.00E-05 | 0.001089 |
| IGF2BP2   | 2.24572 | 5.00E-05 | 0.001089 |
| H1FO      | 2.24492 | 5.00E-05 | 0.001089 |
| C16orf46  | 2.24267 | 5.00E-05 | 0.001089 |
| ACSBG1    | 2.23737 | 5.00E-05 | 0.001089 |
| STARD13   | 2.23187 | 5.00E-05 | 0.001089 |
| RORB      | 2.22512 | 0.00035  | 0.005299 |
| HIST1H3D  | 2.22024 | 5.00E-05 | 0.001089 |
| CTGF      | 2.21974 | 5.00E-05 | 0.001089 |
| NUAK2     | 2.21893 | 5.00E-05 | 0.001089 |
| HLA-G     | 2.2099  | 0.00015  | 0.002736 |
| MAP2K3    | 2.20267 | 5.00E-05 | 0.001089 |
| PML       | 2.20248 | 5.00E-05 | 0.001089 |

|              |         |          |          |
|--------------|---------|----------|----------|
| APOL3        | 2.20145 | 0.0003   | 0.004684 |
| LOC440461    | 2.19229 | 0.003    | 0.026176 |
| SLC36A2      | 2.19063 | 5.00E-05 | 0.001089 |
| HOXB4        | 2.18659 | 5.00E-05 | 0.001089 |
| HIST1H2BF    | 2.18109 | 5.00E-05 | 0.001089 |
| CCDC85B      | 2.17769 | 5.00E-05 | 0.001089 |
| PER1         | 2.17655 | 5.00E-05 | 0.001089 |
| HRH1         | 2.1732  | 5.00E-05 | 0.001089 |
| IER2         | 2.16798 | 5.00E-05 | 0.001089 |
| FAM151B      | 2.16607 | 5.00E-05 | 0.001089 |
| HPCAL4       | 2.16373 | 0.0001   | 0.001954 |
| PCK1         | 2.16058 | 0.00095  | 0.011119 |
| LOC339894    | 2.16034 | 0.0002   | 0.003428 |
| GIMAP2       | 2.1586  | 0.00375  | 0.031038 |
| CRY1         | 2.14853 | 5.00E-05 | 0.001089 |
| ETS1         | 2.14596 | 5.00E-05 | 0.001089 |
| TRIM25       | 2.14281 | 5.00E-05 | 0.001089 |
| DNAH17       | 2.13665 | 0.00025  | 0.004092 |
| LOC100862671 | 2.13664 | 5.00E-05 | 0.001089 |
| THEMIS2      | 2.13279 | 5.00E-05 | 0.001089 |
| CEACAM20     | 2.13057 | 0.00125  | 0.013761 |
| TRIM5        | 2.1305  | 5.00E-05 | 0.001089 |
| SUCNR1       | 2.12886 | 0.00185  | 0.018595 |
| NEDD4L       | 2.12296 | 5.00E-05 | 0.001089 |
| C7orf63      | 2.11981 | 5.00E-05 | 0.001089 |
| LOC285627    | 2.11737 | 5.00E-05 | 0.001089 |
| CASQ1        | 2.11112 | 0.00045  | 0.006411 |
| NEU1         | 2.10877 | 5.00E-05 | 0.001089 |
| NFAT5        | 2.10831 | 5.00E-05 | 0.001089 |
| PNRC1        | 2.10416 | 5.00E-05 | 0.001089 |
| TCTE1        | 2.10282 | 0.00055  | 0.007519 |
| PNPT1        | 2.10281 | 5.00E-05 | 0.001089 |
| LOC100216546 | 2.09927 | 5.00E-05 | 0.001089 |
| PCP4L1       | 2.09831 | 0.00355  | 0.029785 |
| COL12A1      | 2.09125 | 5.00E-05 | 0.001089 |
| RSRC2        | 2.08574 | 5.00E-05 | 0.001089 |
| ADRB2        | 2.08549 | 5.00E-05 | 0.001089 |
| KCNN2        | 2.08241 | 0.0001   | 0.001954 |
| NPTX1        | 2.07907 | 5.00E-05 | 0.001089 |
| HLA-C        | 2.07719 | 5.00E-05 | 0.001089 |
| SORBS1       | 2.07717 | 5.00E-05 | 0.001089 |
| TIMP3        | 2.07714 | 0.0003   | 0.004684 |
| GPR26        | 2.07677 | 5.00E-05 | 0.001089 |
| LOC100216545 | 2.0763  | 5.00E-05 | 0.001089 |
| MMD2         | 2.07403 | 0.0001   | 0.001954 |
| REL          | 2.06818 | 5.00E-05 | 0.001089 |

|           |         |          |          |
|-----------|---------|----------|----------|
| ZNF655    | 2.06687 | 5.00E-05 | 0.001089 |
| TMEM198   | 2.06388 | 5.00E-05 | 0.001089 |
| GPBP1     | 2.06282 | 5.00E-05 | 0.001089 |
| GRK4      | 2.05946 | 0.0007   | 0.008891 |
| SDCBP     | 2.05931 | 5.00E-05 | 0.001089 |
| MTHFR     | 2.05613 | 5.00E-05 | 0.001089 |
| DNAJB4    | 2.05451 | 5.00E-05 | 0.001089 |
| XDH       | 2.05025 | 5.00E-05 | 0.001089 |
| S100A2    | 2.04178 | 5.00E-05 | 0.001089 |
| TP53INP2  | 2.03771 | 5.00E-05 | 0.001089 |
| HIST1H2BH | 2.03146 | 0.00065  | 0.008431 |
| SAA2      | 2.03106 | 0.0068   | 0.048028 |
| HAPLN3    | 2.02848 | 5.00E-05 | 0.001089 |
| PATL2     | 2.02183 | 0.00085  | 0.010312 |
| ABCB1     | 2.02175 | 0.0008   | 0.009825 |
| CCNL1     | 2.02113 | 5.00E-05 | 0.001089 |
| NFKB1     | 2.01981 | 5.00E-05 | 0.001089 |
| PINLYP    | 2.00666 | 0.0012   | 0.013303 |
| CDKN1C    | 2.00454 | 0.00055  | 0.007519 |
| IFI35     | 2.00433 | 5.00E-05 | 0.001089 |
| HAP1      | 2.00289 | 5.00E-05 | 0.001089 |
| ARID4B    | 2.00041 | 5.00E-05 | 0.001089 |
| CDR1      | 1.99922 | 0.0001   | 0.001954 |
| FAM90A25P | 1.99201 | 0.00635  | 0.045556 |
| SLC16A12  | 1.99175 | 0.0001   | 0.001954 |
| FRMD6     | 1.98949 | 5.00E-05 | 0.001089 |
| TOP1      | 1.98618 | 5.00E-05 | 0.001089 |
| RCAN1     | 1.98279 | 5.00E-05 | 0.001089 |
| LINC00494 | 1.98107 | 0.00065  | 0.008431 |
| HIST1H4E  | 1.98035 | 5.00E-05 | 0.001089 |
| IFITM2    | 1.97731 | 5.00E-05 | 0.001089 |
| H3F3B     | 1.97578 | 5.00E-05 | 0.001089 |
| PCID2     | 1.97167 | 5.00E-05 | 0.001089 |
| LAP3      | 1.96894 | 5.00E-05 | 0.001089 |
| FAM19A3   | 1.96673 | 0.0033   | 0.028192 |
| PLSCR2    | 1.96329 | 0.0008   | 0.009825 |
| IGJ       | 1.95973 | 0.003    | 0.026176 |
| ZNF556    | 1.9576  | 0.002    | 0.01979  |
| DEF6      | 1.95713 | 0.00445  | 0.035135 |
| PGF       | 1.9552  | 5.00E-05 | 0.001089 |
| STK19     | 1.95439 | 0.00075  | 0.009355 |
| TRIM69    | 1.95329 | 0.0019   | 0.019025 |
| KPNA7     | 1.95309 | 5.00E-05 | 0.001089 |
| TMEM86A   | 1.95256 | 0.0015   | 0.015773 |
| TBX21     | 1.94985 | 0.00055  | 0.007519 |
| GCAT      | 1.9478  | 5.00E-05 | 0.001089 |

|           |         |          |          |
|-----------|---------|----------|----------|
| LY6G6C    | 1.94575 | 0.0018   | 0.018195 |
| DUSP5     | 1.94367 | 5.00E-05 | 0.001089 |
| GLS       | 1.94151 | 5.00E-05 | 0.001089 |
| LOC339807 | 1.94042 | 0.00035  | 0.005299 |
| TFPI      | 1.94036 | 5.00E-05 | 0.001089 |
| KBTBD13   | 1.93952 | 0.0011   | 0.012454 |
| HSPB8     | 1.93771 | 5.00E-05 | 0.001089 |
| ELL2      | 1.936   | 5.00E-05 | 0.001089 |
| TRIM38    | 1.9345  | 5.00E-05 | 0.001089 |
| SMTNL1    | 1.93317 | 0.0003   | 0.004684 |
| ACO1      | 1.93008 | 5.00E-05 | 0.001089 |
| LAMB2P1   | 1.92767 | 0.0001   | 0.001954 |
| APOF      | 1.92724 | 0.0001   | 0.001954 |
| RSPRY1    | 1.92668 | 5.00E-05 | 0.001089 |
| CLPS      | 1.92486 | 0.00575  | 0.04224  |
| LATS2     | 1.92377 | 5.00E-05 | 0.001089 |
| MSANTD3   | 1.91618 | 5.00E-05 | 0.001089 |
| PLAUR     | 1.91588 | 5.00E-05 | 0.001089 |
| AZI2      | 1.91527 | 5.00E-05 | 0.001089 |
| HIST1H4H  | 1.91472 | 5.00E-05 | 0.001089 |
| MEG8      | 1.91448 | 0.00325  | 0.027854 |
| AGTR1     | 1.91292 | 0.0007   | 0.008891 |
| OLR1      | 1.91094 | 0.0002   | 0.003428 |
| CCDC11    | 1.91005 | 5.00E-05 | 0.001089 |
| AMHR2     | 1.90975 | 0.00045  | 0.006411 |
| DNAH2     | 1.90804 | 5.00E-05 | 0.001089 |
| KLF4      | 1.90795 | 5.00E-05 | 0.001089 |
| CA13      | 1.90291 | 5.00E-05 | 0.001089 |
| CLK1      | 1.90291 | 5.00E-05 | 0.001089 |
| GRHL2     | 1.90216 | 0.0003   | 0.004684 |
| CLDN6     | 1.90166 | 0.0004   | 0.005861 |
| UCN2      | 1.90134 | 5.00E-05 | 0.001089 |
| MAP1LC3A  | 1.89741 | 5.00E-05 | 0.001089 |
| SLC30A7   | 1.89402 | 5.00E-05 | 0.001089 |
| TRIM14    | 1.89249 | 5.00E-05 | 0.001089 |
| WHAMM     | 1.89175 | 5.00E-05 | 0.001089 |
| SLC6A13   | 1.89031 | 0.00065  | 0.008431 |
| APLF      | 1.88369 | 5.00E-05 | 0.001089 |
| DCHS1     | 1.88317 | 5.00E-05 | 0.001089 |
| SELL      | 1.88163 | 0.00135  | 0.014531 |
| EBI3      | 1.88157 | 0.0011   | 0.012454 |
| SEMA7A    | 1.87974 | 5.00E-05 | 0.001089 |
| COL1A2    | 1.87623 | 0.0013   | 0.014165 |
| ANXA5     | 1.87382 | 5.00E-05 | 0.001089 |
| ACHE      | 1.87313 | 0.0001   | 0.001954 |
| KLF10     | 1.87284 | 5.00E-05 | 0.001089 |

|              |         |          |          |
|--------------|---------|----------|----------|
| IRF8         | 1.86942 | 0.0001   | 0.001954 |
| IL1A         | 1.86159 | 0.0002   | 0.003428 |
| TRA2A        | 1.85937 | 5.00E-05 | 0.001089 |
| LOC100288181 | 1.85404 | 5.00E-05 | 0.001089 |
| ACER2        | 1.8527  | 5.00E-05 | 0.001089 |
| RASGRP3      | 1.8486  | 5.00E-05 | 0.001089 |
| LOC541471    | 1.84817 | 5.00E-05 | 0.001089 |
| CYP3A5       | 1.8452  | 5.00E-05 | 0.001089 |
| LAMB3        | 1.84445 | 5.00E-05 | 0.001089 |
| WDR26        | 1.84344 | 5.00E-05 | 0.001089 |
| RUNX1        | 1.84321 | 5.00E-05 | 0.001089 |
| TKTL1        | 1.84293 | 0.0008   | 0.009825 |
| PRDM1        | 1.84235 | 5.00E-05 | 0.001089 |
| C2CD4A       | 1.83986 | 0.00025  | 0.004092 |
| TLR3         | 1.8397  | 5.00E-05 | 0.001089 |
| C11orf68     | 1.83518 | 5.00E-05 | 0.001089 |
| PLAGL1       | 1.83488 | 5.00E-05 | 0.001089 |
| KLF2         | 1.83447 | 5.00E-05 | 0.001089 |
| LOC284581    | 1.83221 | 5.00E-05 | 0.001089 |
| HSH2D        | 1.83187 | 5.00E-05 | 0.001089 |
| HCLS1        | 1.82956 | 0.00045  | 0.006411 |
| LRR32        | 1.82777 | 0.00075  | 0.009355 |
| KDM6A        | 1.82742 | 5.00E-05 | 0.001089 |
| SYNE1        | 1.8259  | 5.00E-05 | 0.001089 |
| THEG         | 1.8236  | 0.00095  | 0.011119 |
| USP53        | 1.82206 | 5.00E-05 | 0.001089 |
| HIST1H2BK    | 1.82185 | 5.00E-05 | 0.001089 |
| FNIP1        | 1.82009 | 5.00E-05 | 0.001089 |
| AP3S1        | 1.819   | 5.00E-05 | 0.001089 |
| SLCO1B7      | 1.81747 | 0.0001   | 0.001954 |
| GALR3        | 1.81741 | 0.0022   | 0.021101 |
| FAM133DP     | 1.81574 | 5.00E-05 | 0.001089 |
| NR1D2        | 1.81574 | 5.00E-05 | 0.001089 |
| H1FX         | 1.81429 | 5.00E-05 | 0.001089 |
| LGALS3BP     | 1.81276 | 5.00E-05 | 0.001089 |
| C6orf25      | 1.80969 | 5.00E-05 | 0.001089 |
| ROCK1P1      | 1.80797 | 0.0003   | 0.004684 |
| TAS2R42      | 1.80648 | 0.00425  | 0.034028 |
| NLGN3        | 1.80488 | 5.00E-05 | 0.001089 |
| LOC201651    | 1.80287 | 0.0003   | 0.004684 |
| RIOK3        | 1.80218 | 5.00E-05 | 0.001089 |
| TRIP12       | 1.80218 | 5.00E-05 | 0.001089 |
| CDKL4        | 1.80185 | 0.00335  | 0.028542 |
| AHR          | 1.8007  | 5.00E-05 | 0.001089 |
| LOC100506668 | 1.79774 | 0.00045  | 0.006411 |
| SPRED2       | 1.79461 | 5.00E-05 | 0.001089 |

|              |         |          |          |
|--------------|---------|----------|----------|
| PHLDA2       | 1.79232 | 5.00E-05 | 0.001089 |
| TRIML2       | 1.79217 | 5.00E-05 | 0.001089 |
| BMP2         | 1.79212 | 0.0001   | 0.001954 |
| C8orf42      | 1.79048 | 5.00E-05 | 0.001089 |
| LOC643723    | 1.78666 | 0.0012   | 0.013303 |
| DUSP1        | 1.78619 | 5.00E-05 | 0.001089 |
| CSF3         | 1.78531 | 0.00055  | 0.007519 |
| GCNT1        | 1.78428 | 5.00E-05 | 0.001089 |
| ZSCAN12P1    | 1.78133 | 5.00E-05 | 0.001089 |
| ETV7         | 1.77971 | 0.00065  | 0.008431 |
| BEST3        | 1.7781  | 0.00015  | 0.002736 |
| MIR100HG     | 1.77557 | 5.00E-05 | 0.001089 |
| ZNF335       | 1.77387 | 5.00E-05 | 0.001089 |
| TMEM95       | 1.77204 | 0.00135  | 0.014531 |
| LAMTOR3      | 1.77063 | 5.00E-05 | 0.001089 |
| ING1         | 1.76945 | 5.00E-05 | 0.001089 |
| KDM5B        | 1.7691  | 5.00E-05 | 0.001089 |
| KLHL4        | 1.76639 | 5.00E-05 | 0.001089 |
| SOCS3        | 1.76181 | 5.00E-05 | 0.001089 |
| NFKBIB       | 1.7612  | 5.00E-05 | 0.001089 |
| C8orf46      | 1.75999 | 0.0003   | 0.004684 |
| SYNJ1        | 1.75975 | 5.00E-05 | 0.001089 |
| PROX1        | 1.75881 | 0.00015  | 0.002736 |
| FNDC7        | 1.75351 | 0.00115  | 0.012865 |
| GPR3         | 1.75222 | 0.0001   | 0.001954 |
| EXT1         | 1.75174 | 5.00E-05 | 0.001089 |
| FYB          | 1.75134 | 5.00E-05 | 0.001089 |
| RAB30        | 1.74992 | 5.00E-05 | 0.001089 |
| MPZL3        | 1.74817 | 0.0004   | 0.005861 |
| CSRP2        | 1.74763 | 5.00E-05 | 0.001089 |
| ALDH8A1      | 1.7358  | 0.00015  | 0.002736 |
| MAFA         | 1.73573 | 0.00035  | 0.005299 |
| SERPINB9     | 1.72876 | 5.00E-05 | 0.001089 |
| NEURL3       | 1.72801 | 5.00E-05 | 0.001089 |
| IFRD1        | 1.72754 | 5.00E-05 | 0.001089 |
| C3           | 1.72633 | 5.00E-05 | 0.001089 |
| LIMA1        | 1.72513 | 5.00E-05 | 0.001089 |
| SHISA2       | 1.72413 | 0.00035  | 0.005299 |
| FMR1         | 1.72186 | 5.00E-05 | 0.001089 |
| RHEBL1       | 1.72172 | 5.00E-05 | 0.001089 |
| HLA-DOB      | 1.72148 | 0.00215  | 0.020747 |
| HES4         | 1.7204  | 5.00E-05 | 0.001089 |
| TNC          | 1.7183  | 0.0002   | 0.003428 |
| LOC100287846 | 1.71811 | 5.00E-05 | 0.001089 |
| GP6          | 1.71495 | 5.00E-05 | 0.001089 |
| BRAF         | 1.7135  | 5.00E-05 | 0.001089 |

|              |         |          |          |
|--------------|---------|----------|----------|
| TSC22D2      | 1.71332 | 5.00E-05 | 0.001089 |
| SP140L       | 1.71283 | 0.0001   | 0.001954 |
| CD59         | 1.71261 | 5.00E-05 | 0.001089 |
| SAMD4A       | 1.71223 | 5.00E-05 | 0.001089 |
| GORAB        | 1.71211 | 5.00E-05 | 0.001089 |
| SLCO1C1      | 1.71204 | 0.0004   | 0.005861 |
| HIST1H4J     | 1.71007 | 5.00E-05 | 0.001089 |
| SLCO1A2      | 1.70922 | 0.0016   | 0.016584 |
| EEA1         | 1.70829 | 5.00E-05 | 0.001089 |
| BCL2L12      | 1.70733 | 0.0013   | 0.014165 |
| RASAL2       | 1.70457 | 5.00E-05 | 0.001089 |
| C5orf56      | 1.70341 | 0.0006   | 0.008024 |
| SMURF2       | 1.70336 | 5.00E-05 | 0.001089 |
| LOC100289187 | 1.7023  | 0.0007   | 0.008891 |
| FAIM3        | 1.69945 | 0.0025   | 0.023036 |
| CRISPLD2     | 1.6991  | 5.00E-05 | 0.001089 |
| TFPI2        | 1.69767 | 5.00E-05 | 0.001089 |
| NBR1         | 1.69749 | 5.00E-05 | 0.001089 |
| CHD2         | 1.69476 | 5.00E-05 | 0.001089 |
| LOC100128822 | 1.69384 | 0.00025  | 0.004092 |
| TSC22D1      | 1.68677 | 5.00E-05 | 0.001089 |
| HERC4        | 1.68567 | 5.00E-05 | 0.001089 |
| USP43        | 1.68303 | 5.00E-05 | 0.001089 |
| SERPINB8     | 1.68268 | 5.00E-05 | 0.001089 |
| MASTL        | 1.68179 | 5.00E-05 | 0.001089 |
| AP1B1P1      | 1.67807 | 0.0037   | 0.030688 |
| DDX26B       | 1.67733 | 0.00075  | 0.009355 |
| PGM5         | 1.66994 | 0.00205  | 0.020098 |
| GTF2B        | 1.66675 | 5.00E-05 | 0.001089 |
| SGMS2        | 1.66468 | 5.00E-05 | 0.001089 |
| ATP6V1D      | 1.66461 | 5.00E-05 | 0.001089 |
| BAZ1A        | 1.66327 | 5.00E-05 | 0.001089 |
| PIP5K1A      | 1.66294 | 5.00E-05 | 0.001089 |
| RBM24        | 1.66194 | 5.00E-05 | 0.001089 |
| CPM          | 1.66179 | 5.00E-05 | 0.001089 |
| LIPG         | 1.66117 | 0.00045  | 0.006411 |
| PCDH10       | 1.65996 | 5.00E-05 | 0.001089 |
| MAFB         | 1.65713 | 0.00105  | 0.012007 |
| RCBTB2       | 1.65231 | 0.0001   | 0.001954 |
| RANBP3L      | 1.64767 | 0.00355  | 0.029785 |
| ZCCHC6       | 1.64666 | 5.00E-05 | 0.001089 |
| CITED2       | 1.64584 | 5.00E-05 | 0.001089 |
| DPY19L2P2    | 1.64326 | 5.00E-05 | 0.001089 |
| CXCL3        | 1.64115 | 5.00E-05 | 0.001089 |
| PIWIL2       | 1.64041 | 0.00015  | 0.002736 |
| LOC283663    | 1.63462 | 0.0001   | 0.001954 |



|           |         |          |          |
|-----------|---------|----------|----------|
| GLCCI1    | 1.6335  | 5.00E-05 | 0.001089 |
| TNFRSF10B | 1.63073 | 5.00E-05 | 0.001089 |
| SOWAHB    | 1.63038 | 0.00415  | 0.033547 |
| SCYL2     | 1.62862 | 5.00E-05 | 0.001089 |
| FOSL2     | 1.62829 | 5.00E-05 | 0.001089 |
| UBE2L6    | 1.62538 | 5.00E-05 | 0.001089 |
| IMPG2     | 1.62431 | 0.00055  | 0.007519 |
| LINC00507 | 1.62328 | 0.00685  | 0.048253 |
| ING3      | 1.62273 | 5.00E-05 | 0.001089 |
| BACH2     | 1.62258 | 0.0002   | 0.003428 |
| PAR6G     | 1.62061 | 0.00015  | 0.002736 |
| EPC1      | 1.6192  | 5.00E-05 | 0.001089 |
| PTHLH     | 1.61771 | 5.00E-05 | 0.001089 |
| BTBD19    | 1.61728 | 0.0033   | 0.028192 |
| NR4A2     | 1.61432 | 5.00E-05 | 0.001089 |
| SAT1      | 1.61251 | 5.00E-05 | 0.001089 |
| CPEB2     | 1.6119  | 5.00E-05 | 0.001089 |
| MT2A      | 1.60968 | 0.00035  | 0.005299 |
| HAS2      | 1.60966 | 0.00165  | 0.017002 |
| PRKD2     | 1.60834 | 5.00E-05 | 0.001089 |
| ANKRD33B  | 1.60689 | 5.00E-05 | 0.001089 |
| CDK7      | 1.60476 | 5.00E-05 | 0.001089 |
| ROPN1L    | 1.60335 | 0.00275  | 0.024628 |
| DLL1      | 1.60267 | 0.00075  | 0.009355 |
| SIRT1     | 1.6003  | 5.00E-05 | 0.001089 |
| GPATCH2L  | 1.5995  | 5.00E-05 | 0.001089 |
| DLL4      | 1.59932 | 0.0004   | 0.005861 |
| ABCC11    | 1.59798 | 0.0011   | 0.012454 |
| NR1H4     | 1.59529 | 0.0003   | 0.004684 |
| KIAA1045  | 1.59169 | 0.00095  | 0.011119 |
| ADAR      | 1.58865 | 5.00E-05 | 0.001089 |
| CATSPERG  | 1.58837 | 0.0002   | 0.003428 |
| SETX      | 1.58815 | 5.00E-05 | 0.001089 |
| SLCO1B3   | 1.58781 | 5.00E-05 | 0.001089 |
| KBTD8     | 1.58738 | 5.00E-05 | 0.001089 |
| HBP1      | 1.58596 | 0.00415  | 0.033547 |
| SLC8A2    | 1.58394 | 0.0006   | 0.008024 |
| PIGA      | 1.58388 | 5.00E-05 | 0.001089 |
| ITGAV     | 1.5803  | 5.00E-05 | 0.001089 |
| NGFR      | 1.58029 | 0.0017   | 0.017361 |
| LOC392364 | 1.57767 | 0.00275  | 0.024628 |
| TNFRSF10D | 1.57748 | 5.00E-05 | 0.001089 |
| MFSD2B    | 1.57471 | 0.00075  | 0.009355 |
| MITF      | 1.57465 | 5.00E-05 | 0.001089 |
| ASB2      | 1.5737  | 0.0038   | 0.031338 |
| FBXO33    | 1.57352 | 5.00E-05 | 0.001089 |

|             |         |          |          |
|-------------|---------|----------|----------|
| BBC3        | 1.57253 | 5.00E-05 | 0.001089 |
| AZIN1       | 1.57048 | 5.00E-05 | 0.001089 |
| PHF11       | 1.5695  | 0.0001   | 0.001954 |
| RAB5A       | 1.56761 | 5.00E-05 | 0.001089 |
| GPD1        | 1.56684 | 0.00025  | 0.004092 |
| ELF1        | 1.56683 | 5.00E-05 | 0.001089 |
| CLK4        | 1.56523 | 5.00E-05 | 0.001089 |
| YTHDC1      | 1.56369 | 5.00E-05 | 0.001089 |
| SLC6A12     | 1.56198 | 0.00225  | 0.021413 |
| KCTD11      | 1.56073 | 5.00E-05 | 0.001089 |
| CXCL2       | 1.56023 | 5.00E-05 | 0.001089 |
| MMP25       | 1.5571  | 0.00045  | 0.006411 |
| MICALCL     | 1.55639 | 0.00145  | 0.015348 |
| CHEK2       | 1.55566 | 5.00E-05 | 0.001089 |
| RELT        | 1.55552 | 5.00E-05 | 0.001089 |
| NSUN6       | 1.55419 | 0.0001   | 0.001954 |
| ADAP1       | 1.55217 | 0.0003   | 0.004684 |
| CSDAP1      | 1.55211 | 0.00015  | 0.002736 |
| C7orf71     | 1.551   | 0.0059   | 0.043143 |
| SLC17A7     | 1.55015 | 0.00205  | 0.020098 |
| LETM2       | 1.55002 | 0.00015  | 0.002736 |
| HIST2H4A    | 1.54856 | 0.0001   | 0.001954 |
| GADD45A     | 1.54789 | 5.00E-05 | 0.001089 |
| ABCA5       | 1.5454  | 0.00015  | 0.002736 |
| KLHL15      | 1.54298 | 5.00E-05 | 0.001089 |
| KIAA1217    | 1.54017 | 5.00E-05 | 0.001089 |
| MYPN        | 1.53603 | 5.00E-05 | 0.001089 |
| SLCO1B1     | 1.53506 | 0.0016   | 0.016584 |
| CD55        | 1.5344  | 5.00E-05 | 0.001089 |
| NEXN        | 1.53411 | 0.0002   | 0.003428 |
| TNIP2       | 1.53072 | 5.00E-05 | 0.001089 |
| LOC400027   | 1.53006 | 5.00E-05 | 0.001089 |
| USP16       | 1.52977 | 5.00E-05 | 0.001089 |
| MAP1LC3B2   | 1.52486 | 0.00495  | 0.038212 |
| ANKRD20A19P | 1.52434 | 0.0004   | 0.005861 |
| ALCAM       | 1.52408 | 5.00E-05 | 0.001089 |
| RRAD        | 1.5235  | 0.00645  | 0.046066 |
| NMI         | 1.52307 | 0.00025  | 0.004092 |
| LINC00854   | 1.5224  | 0.00085  | 0.010312 |
| VEGFC       | 1.51784 | 5.00E-05 | 0.001089 |
| MITD1       | 1.51713 | 5.00E-05 | 0.001089 |
| CORO2B      | 1.51637 | 0.0006   | 0.008024 |
| SLC4A7      | 1.51572 | 5.00E-05 | 0.001089 |
| BLZF1       | 1.51496 | 5.00E-05 | 0.001089 |
| CDKN2AIP    | 1.51424 | 5.00E-05 | 0.001089 |
| MATN1-AS1   | 1.51306 | 0.00015  | 0.002736 |

|           |         |          |          |
|-----------|---------|----------|----------|
| IMPA1     | 1.51203 | 5.00E-05 | 0.001089 |
| EREG      | 1.51047 | 0.0001   | 0.001954 |
| ARF4      | 1.50973 | 5.00E-05 | 0.001089 |
| MYH15     | 1.50952 | 0.0005   | 0.006979 |
| LRGUK     | 1.50469 | 0.0026   | 0.023711 |
| GCH1      | 1.50293 | 0.00025  | 0.004092 |
| CRABP2    | 1.49952 | 0.00095  | 0.011119 |
| KATNA1    | 1.49836 | 0.00015  | 0.002736 |
| BIRC2     | 1.49802 | 5.00E-05 | 0.001089 |
| YOD1      | 1.49311 | 5.00E-05 | 0.001089 |
| TLE4      | 1.49257 | 5.00E-05 | 0.001089 |
| SRSF3     | 1.49187 | 5.00E-05 | 0.001089 |
| MEG3      | 1.49179 | 0.0006   | 0.008024 |
| PRDM8     | 1.49068 | 0.00195  | 0.01938  |
| HSD17B7P2 | 1.49007 | 0.00025  | 0.004092 |
| RBM39     | 1.48683 | 5.00E-05 | 0.001089 |
| PPP2R3C   | 1.48592 | 5.00E-05 | 0.001089 |
| SOCS2     | 1.48582 | 5.00E-05 | 0.001089 |
| CASP3     | 1.48459 | 5.00E-05 | 0.001089 |
| DCAF8L2   | 1.48379 | 0.00635  | 0.045556 |
| HIST1H3E  | 1.48378 | 5.00E-05 | 0.001089 |
| GRIK5     | 1.48345 | 0.0009   | 0.010731 |
| GTPBP1    | 1.48344 | 5.00E-05 | 0.001089 |
| DNAJC27   | 1.48314 | 5.00E-05 | 0.001089 |
| ELOVL7    | 1.48234 | 5.00E-05 | 0.001089 |
| INO80D    | 1.48129 | 5.00E-05 | 0.001089 |
| XRN1      | 1.48073 | 5.00E-05 | 0.001089 |
| ALOX15    | 1.47945 | 0.00525  | 0.039739 |
| GDAP1     | 1.4786  | 5.00E-05 | 0.001089 |
| UTY       | 1.47747 | 5.00E-05 | 0.001089 |
| RPL13AP20 | 1.47496 | 0.0001   | 0.001954 |
| NIM1      | 1.4738  | 0.00105  | 0.012007 |
| CYFIP1    | 1.47337 | 5.00E-05 | 0.001089 |
| VPS37B    | 1.47123 | 5.00E-05 | 0.001089 |
| NMT2      | 1.46963 | 5.00E-05 | 0.001089 |
| LOX       | 1.46789 | 0.00025  | 0.004092 |
| AXL       | 1.46592 | 5.00E-05 | 0.001089 |
| YY1AP1    | 1.46575 | 5.00E-05 | 0.001089 |
| STX3      | 1.46538 | 5.00E-05 | 0.001089 |
| CHGB      | 1.46419 | 0.00045  | 0.006411 |
| PPIL4     | 1.46255 | 0.0001   | 0.001954 |
| SEC24A    | 1.46214 | 5.00E-05 | 0.001089 |
| ZMYM5     | 1.45997 | 0.00035  | 0.005299 |
| TRIM26    | 1.45911 | 5.00E-05 | 0.001089 |
| RABGEF1   | 1.45882 | 5.00E-05 | 0.001089 |
| ZBTB10    | 1.45866 | 5.00E-05 | 0.001089 |

|           |         |          |          |
|-----------|---------|----------|----------|
| KIAA1033  | 1.45302 | 5.00E-05 | 0.001089 |
| YPEL4     | 1.45275 | 5.00E-05 | 0.001089 |
| HOXD10    | 1.45089 | 0.00075  | 0.009355 |
| WSB1      | 1.45022 | 5.00E-05 | 0.001089 |
| UGCG      | 1.44906 | 5.00E-05 | 0.001089 |
| DDX3X     | 1.44903 | 0.00015  | 0.002736 |
| SMC4      | 1.44885 | 5.00E-05 | 0.001089 |
| DDX10     | 1.44723 | 5.00E-05 | 0.001089 |
| STX11     | 1.44663 | 0.00035  | 0.005299 |
| HIST2H4B  | 1.446   | 5.00E-05 | 0.001089 |
| COL7A1    | 1.44367 | 0.0001   | 0.001954 |
| MARCH4    | 1.44343 | 5.00E-05 | 0.001089 |
| THAP1     | 1.4419  | 5.00E-05 | 0.001089 |
| HIST2H2BA | 1.44179 | 0.0008   | 0.009825 |
| AOC3      | 1.43987 | 0.00015  | 0.002736 |
| DCAF8     | 1.43954 | 5.00E-05 | 0.001089 |
| ZNF764    | 1.43841 | 0.0001   | 0.001954 |
| HELQ      | 1.43742 | 5.00E-05 | 0.001089 |
| SLC25A2   | 1.43736 | 0.00395  | 0.032241 |
| FZD4      | 1.4363  | 5.00E-05 | 0.001089 |
| RABGGTB   | 1.4335  | 5.00E-05 | 0.001089 |
| CEP135    | 1.43309 | 5.00E-05 | 0.001089 |
| P4HA1     | 1.43206 | 5.00E-05 | 0.001089 |
| MTRNR2L8  | 1.43158 | 0.0066   | 0.046885 |
| RPL21P44  | 1.43095 | 0.0012   | 0.013303 |
| B3GALNT2  | 1.42889 | 0.0004   | 0.005861 |
| NPC1      | 1.42853 | 5.00E-05 | 0.001089 |
| RYBP      | 1.42744 | 5.00E-05 | 0.001089 |
| ZNF474    | 1.42664 | 0.00075  | 0.009355 |
| OXTR      | 1.42615 | 5.00E-05 | 0.001089 |
| HSPH1     | 1.42551 | 5.00E-05 | 0.001089 |
| KIF20B    | 1.42535 | 5.00E-05 | 0.001089 |
| AKT1S1    | 1.42523 | 5.00E-05 | 0.001089 |
| ANKRD13A  | 1.42512 | 5.00E-05 | 0.001089 |
| POTEM     | 1.4235  | 0.0004   | 0.005861 |
| LINC00472 | 1.41882 | 5.00E-05 | 0.001089 |
| LYST      | 1.41725 | 0.0001   | 0.001954 |
| SLC41A1   | 1.41595 | 5.00E-05 | 0.001089 |
| DCUN1D3   | 1.41452 | 5.00E-05 | 0.001089 |
| EPHA4     | 1.41448 | 0.0005   | 0.006979 |
| CEACAM22P | 1.41294 | 0.001    | 0.011594 |
| C10orf118 | 1.41278 | 5.00E-05 | 0.001089 |
| SMARCA5   | 1.41273 | 5.00E-05 | 0.001089 |
| HIST1H4K  | 1.41099 | 0.0002   | 0.003428 |
| PPEF1     | 1.41097 | 0.0024   | 0.022413 |
| SPRY4     | 1.41067 | 5.00E-05 | 0.001089 |

|           |         |          |          |
|-----------|---------|----------|----------|
| SMNDC1    | 1.40838 | 0.0001   | 0.001954 |
| CENPE     | 1.40831 | 5.00E-05 | 0.001089 |
| HIST3H2BB | 1.40757 | 5.00E-05 | 0.001089 |
| BCL6      | 1.40577 | 5.00E-05 | 0.001089 |
| LMO7      | 1.40552 | 5.00E-05 | 0.001089 |
| RGS2      | 1.40527 | 0.0001   | 0.001954 |
| IDI1      | 1.40412 | 0.00095  | 0.011119 |
| DDX3Y     | 1.40389 | 5.00E-05 | 0.001089 |
| C21orf91  | 1.40346 | 0.00035  | 0.005299 |
| IL17RE    | 1.4033  | 0.0046   | 0.036087 |
| PGM5P2    | 1.40278 | 0.0002   | 0.003428 |
| GALR2     | 1.40264 | 0.00585  | 0.042856 |
| ANGPTL4   | 1.40247 | 5.00E-05 | 0.001089 |
| RCOR1     | 1.4022  | 5.00E-05 | 0.001089 |
| SNHG8     | 1.4012  | 0.0002   | 0.003428 |
| EFNA1     | 1.4009  | 5.00E-05 | 0.001089 |
| HIST1H1C  | 1.40065 | 0.00045  | 0.006411 |
| LACC1     | 1.39994 | 0.00235  | 0.022088 |
| STX5      | 1.39764 | 5.00E-05 | 0.001089 |
| NCALD     | 1.39609 | 0.001    | 0.011594 |
| UNK       | 1.39592 | 0.00225  | 0.021413 |
| HIST1H2BC | 1.39504 | 0.0001   | 0.001954 |
| PRPF38B   | 1.39461 | 5.00E-05 | 0.001089 |
| RHBDF1    | 1.39117 | 5.00E-05 | 0.001089 |
| BTAF1     | 1.39033 | 5.00E-05 | 0.001089 |
| POLR2A    | 1.38973 | 5.00E-05 | 0.001089 |
| NOC3L     | 1.38972 | 5.00E-05 | 0.001089 |
| MLL5      | 1.3889  | 5.00E-05 | 0.001089 |
| TAF13     | 1.38633 | 0.00075  | 0.009355 |
| NOS2      | 1.38522 | 0.0031   | 0.026901 |
| AREG      | 1.38474 | 0.0001   | 0.001954 |
| FBXO38    | 1.38448 | 5.00E-05 | 0.001089 |
| ANO6      | 1.38267 | 5.00E-05 | 0.001089 |
| NXF1      | 1.38136 | 0.00015  | 0.002736 |
| DUSP16    | 1.3789  | 5.00E-05 | 0.001089 |
| PTBP2     | 1.37857 | 5.00E-05 | 0.001089 |
| HELZ      | 1.3778  | 5.00E-05 | 0.001089 |
| BCLAF1    | 1.37724 | 5.00E-05 | 0.001089 |
| LINC00346 | 1.3749  | 0.0004   | 0.005861 |
| TJAP1     | 1.37441 | 0.00025  | 0.004092 |
| PLAG1     | 1.37434 | 0.00085  | 0.010312 |
| SDC4      | 1.3738  | 5.00E-05 | 0.001089 |
| METTL21D  | 1.37285 | 0.0002   | 0.003428 |
| SNPH      | 1.37265 | 0.0001   | 0.001954 |
| NIPBL     | 1.3719  | 0.0002   | 0.003428 |
| ZC3H11A   | 1.36935 | 0.0012   | 0.013303 |

|              |         |          |          |
|--------------|---------|----------|----------|
| CCNT2        | 1.36902 | 5.00E-05 | 0.001089 |
| HCG27        | 1.36344 | 0.00085  | 0.010312 |
| MYD88        | 1.36264 | 0.00015  | 0.002736 |
| DNAJC25      | 1.36144 | 0.0042   | 0.033797 |
| KIAA1199     | 1.36127 | 0.0005   | 0.006979 |
| ZNF701       | 1.35865 | 0.0052   | 0.039473 |
| FAM214A      | 1.35834 | 5.00E-05 | 0.001089 |
| DIP2C        | 1.35623 | 0.0002   | 0.003428 |
| TRAPPC6B     | 1.35606 | 5.00E-05 | 0.001089 |
| ELMSAN1      | 1.35591 | 0.00045  | 0.006411 |
| RNMT         | 1.35555 | 5.00E-05 | 0.001089 |
| IL15         | 1.35523 | 0.0003   | 0.004684 |
| EBF4         | 1.35506 | 0.0025   | 0.023036 |
| NSRP1        | 1.35481 | 0.0001   | 0.001954 |
| C4orf32      | 1.35106 | 0.0051   | 0.038881 |
| C1orf141     | 1.35072 | 0.007    | 0.04892  |
| KDSR         | 1.34717 | 0.0001   | 0.001954 |
| PLEKHO2      | 1.34557 | 0.00015  | 0.002736 |
| CCDC174      | 1.34424 | 5.00E-05 | 0.001089 |
| RLF          | 1.34208 | 5.00E-05 | 0.001089 |
| SEC23B       | 1.34189 | 5.00E-05 | 0.001089 |
| G2E3         | 1.34155 | 0.00015  | 0.002736 |
| MORC3        | 1.34086 | 5.00E-05 | 0.001089 |
| LINC00857    | 1.34051 | 0.0001   | 0.001954 |
| CEP95        | 1.33946 | 5.00E-05 | 0.001089 |
| FAM46B       | 1.33907 | 0.00025  | 0.004092 |
| USE1         | 1.33747 | 0.00055  | 0.007519 |
| ZUFSP        | 1.33658 | 5.00E-05 | 0.001089 |
| ARL13B       | 1.33549 | 0.00025  | 0.004092 |
| CLCN4        | 1.33324 | 0.0003   | 0.004684 |
| GPRC5A       | 1.33053 | 5.00E-05 | 0.001089 |
| ZNF697       | 1.33049 | 0.0002   | 0.003428 |
| INTS6        | 1.33042 | 0.0002   | 0.003428 |
| ADPRM        | 1.32849 | 0.00015  | 0.002736 |
| TOR1AIP2     | 1.32841 | 0.0001   | 0.001954 |
| MIER1        | 1.32841 | 0.0003   | 0.004684 |
| ATG12        | 1.32799 | 0.0001   | 0.001954 |
| C7orf53      | 1.32784 | 0.00105  | 0.012007 |
| CRSP8P       | 1.32774 | 0.00195  | 0.01938  |
| C3orf35      | 1.32691 | 0.00275  | 0.024628 |
| BCL3         | 1.32671 | 0.0003   | 0.004684 |
| LOC100506305 | 1.32638 | 0.00385  | 0.031636 |
| OR13H1       | 1.32491 | 0.00515  | 0.039205 |
| PNPLA8       | 1.32405 | 0.00045  | 0.006411 |
| CWC22        | 1.32264 | 0.0001   | 0.001954 |
| NFE2L3       | 1.32213 | 0.00015  | 0.002736 |

|           |         |          |          |
|-----------|---------|----------|----------|
| BTG1      | 1.32035 | 0.00015  | 0.002736 |
| NFE2      | 1.32009 | 0.0072   | 0.049859 |
| EPPK1     | 1.31954 | 0.0017   | 0.017361 |
| GULP1     | 1.31917 | 0.0001   | 0.001954 |
| ARNTL2    | 1.3191  | 0.0001   | 0.001954 |
| MYEF2     | 1.3188  | 0.00015  | 0.002736 |
| SAV1      | 1.3183  | 0.0001   | 0.001954 |
| NT5C3     | 1.31564 | 0.00025  | 0.004092 |
| ARAP2     | 1.31306 | 0.0002   | 0.003428 |
| LOC440896 | 1.31262 | 0.00505  | 0.038666 |
| JUND      | 1.31023 | 0.00015  | 0.002736 |
| OSCP1     | 1.31002 | 0.00275  | 0.024628 |
| C15orf48  | 1.30991 | 0.00565  | 0.041892 |
| BTG3      | 1.30906 | 0.00025  | 0.004092 |
| FOXO3     | 1.30904 | 5.00E-05 | 0.001089 |
| SRSF5     | 1.30771 | 0.00025  | 0.004092 |
| ABAT      | 1.30703 | 0.00385  | 0.031636 |
| BCL10     | 1.30676 | 0.0003   | 0.004684 |
| KIF18A    | 1.30635 | 0.0001   | 0.001954 |
| CCDC117   | 1.30526 | 0.0001   | 0.001954 |
| SAR1A     | 1.30317 | 5.00E-05 | 0.001089 |
| KYNU      | 1.30272 | 0.00015  | 0.002736 |
| ARSJ      | 1.30265 | 0.0001   | 0.001954 |
| PLOD2     | 1.30263 | 5.00E-05 | 0.001089 |
| BDP1      | 1.30161 | 0.0001   | 0.001954 |
| MTMR3     | 1.3014  | 0.0001   | 0.001954 |
| AFF4      | 1.29996 | 0.0001   | 0.001954 |
| RAB9A     | 1.29775 | 5.00E-05 | 0.001089 |
| CUL3      | 1.29745 | 0.00065  | 0.008431 |
| SUZ12P1   | 1.29621 | 0.00475  | 0.037027 |
| FAM126B   | 1.29335 | 0.0001   | 0.001954 |
| LOC338817 | 1.29274 | 0.0016   | 0.016584 |
| SELT      | 1.29264 | 0.00025  | 0.004092 |
| AASS      | 1.29156 | 0.00225  | 0.021413 |
| MED13     | 1.29143 | 5.00E-05 | 0.001089 |
| VAV1      | 1.29093 | 0.0007   | 0.008891 |
| HECA      | 1.29061 | 0.00065  | 0.008431 |
| TRA2B     | 1.2879  | 5.00E-05 | 0.001089 |
| NCEH1     | 1.2862  | 5.00E-05 | 0.001089 |
| BRWD3     | 1.28412 | 0.0001   | 0.001954 |
| TRIB1     | 1.28389 | 0.0001   | 0.001954 |
| HIST1H4C  | 1.28388 | 5.00E-05 | 0.001089 |
| DDX5      | 1.28213 | 0.00015  | 0.002736 |
| CHRN2     | 1.28163 | 0.00015  | 0.002736 |
| CCNH      | 1.28118 | 5.00E-05 | 0.001089 |
| BZW1      | 1.27948 | 0.0008   | 0.009825 |

|              |         |          |          |
|--------------|---------|----------|----------|
| VEZT         | 1.27894 | 5.00E-05 | 0.001089 |
| MLL3         | 1.27863 | 5.00E-05 | 0.001089 |
| JAK2         | 1.27684 | 0.00015  | 0.002736 |
| ERCC6L2      | 1.27584 | 0.00045  | 0.006411 |
| NFYB         | 1.27446 | 0.0004   | 0.005861 |
| ZBTB43       | 1.27395 | 5.00E-05 | 0.001089 |
| MAP4K5       | 1.27309 | 0.0002   | 0.003428 |
| STRN3        | 1.27281 | 0.001    | 0.011594 |
| KCNV1        | 1.27218 | 0.0033   | 0.028192 |
| RNF10        | 1.27165 | 0.00015  | 0.002736 |
| ATAD2B       | 1.271   | 0.0001   | 0.001954 |
| GBF1         | 1.27065 | 0.0003   | 0.004684 |
| DENND4A      | 1.26931 | 0.0004   | 0.005861 |
| ZNF165       | 1.26906 | 0.00075  | 0.009355 |
| TTC27        | 1.26858 | 0.00015  | 0.002736 |
| LDLR         | 1.26698 | 0.0003   | 0.004684 |
| RCHY1        | 1.26685 | 0.00045  | 0.006411 |
| LOC441155    | 1.26635 | 0.00095  | 0.011119 |
| ZSWIM6       | 1.26607 | 5.00E-05 | 0.001089 |
| CT45A5       | 1.26506 | 0.00275  | 0.024628 |
| TAF1D        | 1.26487 | 0.00025  | 0.004092 |
| ARIH1        | 1.26392 | 5.00E-05 | 0.001089 |
| FTSJD2       | 1.26322 | 0.0002   | 0.003428 |
| CHIC2        | 1.26301 | 0.0009   | 0.010731 |
| FAM222A      | 1.26283 | 0.0013   | 0.014165 |
| CDKN2C       | 1.26171 | 0.00135  | 0.014531 |
| NLRC4        | 1.26166 | 0.003    | 0.026176 |
| FER          | 1.26045 | 0.0004   | 0.005861 |
| MKLN1        | 1.25995 | 0.00015  | 0.002736 |
| IFT57        | 1.25978 | 0.00065  | 0.008431 |
| FRS2         | 1.25724 | 0.0001   | 0.001954 |
| HIAT1        | 1.25628 | 5.00E-05 | 0.001089 |
| SLMAP        | 1.25343 | 0.0002   | 0.003428 |
| SLC12A4      | 1.25216 | 0.0021   | 0.0204   |
| OFD1         | 1.2512  | 5.00E-05 | 0.001089 |
| ZKSCAN1      | 1.25104 | 5.00E-05 | 0.001089 |
| C6orf141     | 1.25059 | 0.0003   | 0.004684 |
| SEMA3C       | 1.25046 | 0.0001   | 0.001954 |
| LOC100287314 | 1.24931 | 0.0004   | 0.005861 |
| SNX16        | 1.24873 | 0.00375  | 0.031038 |
| DIABLO       | 1.24828 | 0.0001   | 0.001954 |
| TM9SF3       | 1.24777 | 0.0003   | 0.004684 |
| SCFD1        | 1.24622 | 0.00045  | 0.006411 |
| NFKBID       | 1.24386 | 0.0005   | 0.006979 |
| PELI1        | 1.24306 | 0.0004   | 0.005861 |
| COQ10B       | 1.24267 | 0.0001   | 0.001954 |



|              |         |         |          |
|--------------|---------|---------|----------|
| SREK1        | 1.24001 | 0.00205 | 0.020098 |
| NMNAT2       | 1.23957 | 0.0011  | 0.012454 |
| BHLHE40      | 1.23952 | 0.0013  | 0.014165 |
| LIG4         | 1.23934 | 0.00025 | 0.004092 |
| ZDHHHC17     | 1.23918 | 0.00055 | 0.007519 |
| SBDS         | 1.23892 | 0.0003  | 0.004684 |
| LOC100133612 | 1.23891 | 0.0061  | 0.044281 |
| DNAJA1       | 1.23826 | 0.0002  | 0.003428 |
| AP1G1        | 1.23813 | 0.00015 | 0.002736 |
| TTF1         | 1.23554 | 0.0001  | 0.001954 |
| HNRPLL       | 1.23512 | 0.0002  | 0.003428 |
| SON          | 1.23231 | 0.0002  | 0.003428 |
| PPP2R2A      | 1.2294  | 0.0007  | 0.008891 |
| KHNYN        | 1.2291  | 0.0014  | 0.014968 |
| MAK          | 1.22887 | 0.00265 | 0.024071 |
| ATP1B2       | 1.22856 | 0.0052  | 0.039473 |
| WTAP         | 1.22808 | 0.0001  | 0.001954 |
| MYSM1        | 1.22589 | 0.0003  | 0.004684 |
| HIST1H2AC    | 1.22485 | 0.00095 | 0.011119 |
| NEDD4        | 1.22475 | 0.0001  | 0.001954 |
| RBM5         | 1.22469 | 0.00025 | 0.004092 |
| LRRC8E       | 1.22464 | 0.00065 | 0.008431 |
| RND1         | 1.22383 | 0.00025 | 0.004092 |
| C1orf52      | 1.22382 | 0.0007  | 0.008891 |
| CD2AP        | 1.22381 | 0.00035 | 0.005299 |
| RTN4         | 1.22298 | 0.0007  | 0.008891 |
| DHX36        | 1.2204  | 0.0006  | 0.008024 |
| TEAD1        | 1.21714 | 0.0002  | 0.003428 |
| FRRS1        | 1.21473 | 0.00155 | 0.016224 |
| ZNF670       | 1.21408 | 0.00295 | 0.025924 |
| LINC00707    | 1.21379 | 0.0042  | 0.033797 |
| CPEB3        | 1.21374 | 0.00245 | 0.022773 |
| C1orf63      | 1.21221 | 0.00045 | 0.006411 |
| UBR1         | 1.21201 | 0.0002  | 0.003428 |
| HNRNPU       | 1.21179 | 0.00055 | 0.007519 |
| BNIP3        | 1.2116  | 0.0002  | 0.003428 |
| HIVEP1       | 1.21151 | 0.0001  | 0.001954 |
| THOC6        | 1.21125 | 0.0071  | 0.049381 |
| TAPT1        | 1.21101 | 0.00035 | 0.005299 |
| ZBED5        | 1.21008 | 0.0002  | 0.003428 |
| TET2         | 1.20961 | 0.0001  | 0.001954 |
| ZFYVE1       | 1.20813 | 0.0007  | 0.008891 |
| DSEL         | 1.206   | 0.003   | 0.026176 |
| FAM91A1      | 1.20455 | 0.0003  | 0.004684 |
| CHMP4C       | 1.20404 | 0.0003  | 0.004684 |
| TNFRSF12A    | 1.20348 | 0.0004  | 0.005861 |

|              |         |         |          |
|--------------|---------|---------|----------|
| HIPK3        | 1.20328 | 0.0002  | 0.003428 |
| ARID4A       | 1.20307 | 0.0006  | 0.008024 |
| LRIF1        | 1.2029  | 0.00045 | 0.006411 |
| CD22         | 1.20164 | 0.0049  | 0.0379   |
| ERAP2        | 1.19937 | 0.0023  | 0.021759 |
| SP2          | 1.19933 | 0.0004  | 0.005861 |
| FAM200A      | 1.19822 | 0.0004  | 0.005861 |
| SLC2A12      | 1.1971  | 0.0041  | 0.033278 |
| SPOCK1       | 1.19641 | 0.0056  | 0.041637 |
| CELSR3       | 1.19624 | 0.0009  | 0.010731 |
| ZBTB20       | 1.19571 | 0.0002  | 0.003428 |
| UBE2D1       | 1.19525 | 0.00125 | 0.013761 |
| SHOC2        | 1.19522 | 0.0006  | 0.008024 |
| ZNF267       | 1.19468 | 0.00025 | 0.004092 |
| PAF1         | 1.19325 | 0.00015 | 0.002736 |
| RAP1B        | 1.19158 | 0.00065 | 0.008431 |
| ZNF107       | 1.19009 | 0.0009  | 0.010731 |
| HMMR         | 1.19007 | 0.0007  | 0.008891 |
| EP300        | 1.1892  | 0.00035 | 0.005299 |
| CREBBP       | 1.18821 | 0.0001  | 0.001954 |
| FBP2         | 1.18819 | 0.00695 | 0.048678 |
| CCNC         | 1.18745 | 0.00085 | 0.010312 |
| THUMPD2      | 1.18613 | 0.00035 | 0.005299 |
| NF1          | 1.18475 | 0.0013  | 0.014165 |
| MAP4K3       | 1.18461 | 0.00035 | 0.005299 |
| PPAP2B       | 1.18438 | 0.00015 | 0.002736 |
| GEM          | 1.18408 | 0.0002  | 0.003428 |
| GPCPD1       | 1.18391 | 0.0003  | 0.004684 |
| C6orf62      | 1.18354 | 0.00155 | 0.016224 |
| NAALAD2      | 1.18306 | 0.003   | 0.026176 |
| RAB28        | 1.18257 | 0.0015  | 0.015773 |
| PRPF38A      | 1.1824  | 0.00035 | 0.005299 |
| GNG4         | 1.18146 | 0.0027  | 0.024344 |
| UPP1         | 1.1802  | 0.0001  | 0.001954 |
| MYLIP        | 1.179   | 0.0001  | 0.001954 |
| RICTOR       | 1.17847 | 0.00055 | 0.007519 |
| ANKRD42      | 1.17839 | 0.0014  | 0.014968 |
| FERMT2       | 1.17777 | 0.0006  | 0.008024 |
| HSCB         | 1.17664 | 0.001   | 0.011594 |
| ADAM9        | 1.17618 | 0.00035 | 0.005299 |
| ARL4A        | 1.17574 | 0.0004  | 0.005861 |
| LOC100506233 | 1.17463 | 0.00315 | 0.027261 |
| ENSA         | 1.17383 | 0.0021  | 0.0204   |
| TANK         | 1.17347 | 0.0027  | 0.024344 |
| ZNF92        | 1.17292 | 0.00115 | 0.012865 |
| TUFT1        | 1.17208 | 0.00045 | 0.006411 |

|            |         |          |          |
|------------|---------|----------|----------|
| STK38L     | 1.172   | 0.0007   | 0.008891 |
| MAP4K4     | 1.1718  | 0.00025  | 0.004092 |
| UBE2H      | 1.16869 | 0.00035  | 0.005299 |
| YIPF4      | 1.16784 | 0.0029   | 0.025597 |
| DNAJB2     | 1.1678  | 0.00105  | 0.012007 |
| TYW5       | 1.16641 | 0.006    | 0.043714 |
| HES1       | 1.16624 | 0.0004   | 0.005861 |
| GFRA1      | 1.16611 | 0.0039   | 0.031948 |
| CHMP2B     | 1.16504 | 0.0013   | 0.014165 |
| UBE2D3     | 1.16367 | 0.00035  | 0.005299 |
| TP53BP2    | 1.16287 | 0.0001   | 0.001954 |
| RP2        | 1.16195 | 0.00055  | 0.007519 |
| GATA6      | 1.1619  | 0.00145  | 0.015348 |
| CIC        | 1.16146 | 0.0006   | 0.008024 |
| HIST1H4L   | 1.1589  | 0.0014   | 0.014968 |
| CSNK1A1L   | 1.15843 | 0.0017   | 0.017361 |
| TMEM106A   | 1.15799 | 0.00075  | 0.009355 |
| DCBLD2     | 1.1567  | 0.00045  | 0.006411 |
| MTVR2      | 1.15599 | 0.0057   | 0.042028 |
| ZDBF2      | 1.15541 | 5.00E-05 | 0.001089 |
| USP9X      | 1.15511 | 0.00065  | 0.008431 |
| MIRLET7DHG | 1.15366 | 0.0009   | 0.010731 |
| EIF5       | 1.15067 | 0.0008   | 0.009825 |
| KCNJ14     | 1.15004 | 0.0004   | 0.005861 |
| TBC1D23    | 1.14972 | 0.0004   | 0.005861 |
| ARL8B      | 1.14621 | 0.00085  | 0.010312 |
| ATF2       | 1.14583 | 0.00165  | 0.017002 |
| SPATS2L    | 1.14339 | 0.0004   | 0.005861 |
| NABP1      | 1.14304 | 0.00065  | 0.008431 |
| USP8       | 1.1412  | 0.0009   | 0.010731 |
| KDM5D      | 1.13968 | 0.00055  | 0.007519 |
| SLC12A7    | 1.13753 | 0.00115  | 0.012865 |
| CHORDC1    | 1.13711 | 0.0007   | 0.008891 |
| ARID3B     | 1.13645 | 0.0006   | 0.008024 |
| PLEK2      | 1.13455 | 0.00555  | 0.041342 |
| PIK3C2A    | 1.13355 | 0.0006   | 0.008024 |
| FAM193A    | 1.13195 | 0.00045  | 0.006411 |
| CNTN2      | 1.13193 | 0.0054   | 0.040509 |
| C14orf28   | 1.13113 | 0.0048   | 0.037289 |
| DGUOK      | 1.12904 | 0.00045  | 0.006411 |
| ZNF207     | 1.12896 | 0.0004   | 0.005861 |
| SLU7       | 1.12863 | 0.0003   | 0.004684 |
| SNAP23     | 1.12832 | 0.00275  | 0.024628 |
| ZNF274     | 1.12807 | 0.00045  | 0.006411 |
| ZFAND3     | 1.12797 | 0.00075  | 0.009355 |
| ANKRD20A5P | 1.1274  | 0.0043   | 0.034308 |

|           |         |         |          |
|-----------|---------|---------|----------|
| HELB      | 1.12729 | 0.00135 | 0.014531 |
| PDE10A    | 1.12659 | 0.0006  | 0.008024 |
| CDC73     | 1.12618 | 0.00195 | 0.01938  |
| DRAP1     | 1.12594 | 0.0013  | 0.014165 |
| UBN2      | 1.12524 | 0.0003  | 0.004684 |
| TGFB2     | 1.12512 | 0.00045 | 0.006411 |
| LOC91948  | 1.12372 | 0.0021  | 0.0204   |
| CD164     | 1.12351 | 0.0005  | 0.006979 |
| EIF4A2    | 1.12324 | 0.0011  | 0.012454 |
| CCDC88A   | 1.12239 | 0.0008  | 0.009825 |
| TIPARP    | 1.1218  | 0.0021  | 0.0204   |
| CCDC50    | 1.12165 | 0.001   | 0.011594 |
| ODC1      | 1.1214  | 0.00055 | 0.007519 |
| RB1CC1    | 1.12138 | 0.00085 | 0.010312 |
| TSG101    | 1.12094 | 0.00015 | 0.002736 |
| TBK1      | 1.12066 | 0.00065 | 0.008431 |
| SETD5-AS1 | 1.1203  | 0.001   | 0.011594 |
| PPP6C     | 1.12001 | 0.00245 | 0.022773 |
| C2orf42   | 1.11955 | 0.001   | 0.011594 |
| SYF2      | 1.11858 | 0.0021  | 0.0204   |
| ARNTL     | 1.11816 | 0.00205 | 0.020098 |
| GPR126    | 1.1176  | 0.0008  | 0.009825 |
| MUC1      | 1.11741 | 0.00685 | 0.048253 |
| NTN4      | 1.11653 | 0.0009  | 0.010731 |
| STK11IP   | 1.11574 | 0.00195 | 0.01938  |
| KDM3A     | 1.1152  | 0.00055 | 0.007519 |
| NR3C1     | 1.11511 | 0.00185 | 0.018595 |
| KPNA4     | 1.11499 | 0.0018  | 0.018195 |
| ZFAT      | 1.11497 | 0.0016  | 0.016584 |
| CUL4B     | 1.11407 | 0.00035 | 0.005299 |
| CPEB4     | 1.11358 | 0.00055 | 0.007519 |
| MAGT1     | 1.11351 | 0.00055 | 0.007519 |
| FNDC3A    | 1.11221 | 0.00045 | 0.006411 |
| ARL14EP   | 1.11184 | 0.0012  | 0.013303 |
| SRP54     | 1.11177 | 0.00155 | 0.016224 |
| PATL1     | 1.11132 | 0.00065 | 0.008431 |
| AKAP8L    | 1.11123 | 0.0009  | 0.010731 |
| SERINC3   | 1.11052 | 0.00095 | 0.011119 |
| TAB2      | 1.11029 | 0.0007  | 0.008891 |
| TLK2      | 1.11017 | 0.00045 | 0.006411 |
| TBPL1     | 1.11012 | 0.0018  | 0.018195 |
| CIR1      | 1.10922 | 0.00175 | 0.017791 |
| HPS5      | 1.10883 | 0.0005  | 0.006979 |
| PPP2CB    | 1.10871 | 0.00025 | 0.004092 |
| STRIP2    | 1.10864 | 0.00365 | 0.030415 |
| ATF7IP2   | 1.10848 | 0.0035  | 0.02963  |

|           |         |         |          |
|-----------|---------|---------|----------|
| SENP2     | 1.10838 | 0.00065 | 0.008431 |
| TAF2      | 1.10819 | 0.00055 | 0.007519 |
| BAZ2B     | 1.10768 | 0.0003  | 0.004684 |
| HIST1H2BD | 1.10728 | 0.0003  | 0.004684 |
| SEPT10    | 1.10683 | 0.0023  | 0.021759 |
| DDX50     | 1.10643 | 0.00045 | 0.006411 |
| PIPSL     | 1.10643 | 0.00075 | 0.009355 |
| GPATCH2   | 1.10622 | 0.00055 | 0.007519 |
| TFE3      | 1.10621 | 0.00075 | 0.009355 |
| RNF138    | 1.10616 | 0.0014  | 0.014968 |
| HIF1A     | 1.1054  | 0.00095 | 0.011119 |
| TOR1AIP1  | 1.1051  | 0.0007  | 0.008891 |
| ITCH      | 1.10406 | 0.0006  | 0.008024 |
| EBF1      | 1.10394 | 0.002   | 0.01979  |
| TCEANC    | 1.10315 | 0.0055  | 0.041143 |
| RASEF     | 1.10046 | 0.0008  | 0.009825 |
| ZNF669    | 1.09973 | 0.00115 | 0.012865 |
| ZFP36L1   | 1.09809 | 0.00065 | 0.008431 |
| TMEM156   | 1.0979  | 0.0009  | 0.010731 |
| HCCS      | 1.09679 | 0.0007  | 0.008891 |
| TNIP1     | 1.09671 | 0.0008  | 0.009825 |
| ZC3H15    | 1.09483 | 0.00065 | 0.008431 |
| PNISR     | 1.09469 | 0.00065 | 0.008431 |
| FRMD4B    | 1.09448 | 0.0009  | 0.010731 |
| SRSF6     | 1.09368 | 0.00075 | 0.009355 |
| PTPN11    | 1.09303 | 0.0022  | 0.021101 |
| CHM       | 1.0919  | 0.0027  | 0.024344 |
| VEZF1     | 1.09134 | 0.0009  | 0.010731 |
| ACOT9     | 1.09096 | 0.00065 | 0.008431 |
| ZC3H12C   | 1.09033 | 0.0004  | 0.005861 |
| NDUFA5    | 1.09021 | 0.0071  | 0.049381 |
| UBA6      | 1.09008 | 0.00225 | 0.021413 |
| KDM5C     | 1.08906 | 0.00235 | 0.022088 |
| ZNF160    | 1.08792 | 0.0011  | 0.012454 |
| DENND5A   | 1.0862  | 0.00075 | 0.009355 |
| SBDSP1    | 1.08535 | 0.0027  | 0.024344 |
| YAF2      | 1.08533 | 0.0017  | 0.017361 |
| YIPF6     | 1.08512 | 0.00105 | 0.012007 |
| ATF7IP    | 1.08437 | 0.0005  | 0.006979 |
| DAAM1     | 1.08426 | 0.0022  | 0.021101 |
| GOLGB1    | 1.08354 | 0.0007  | 0.008891 |
| SAMD8     | 1.08339 | 0.00085 | 0.010312 |
| ANXA3     | 1.08104 | 0.0018  | 0.018195 |
| PPID      | 1.08058 | 0.0013  | 0.014165 |
| FUNDC2    | 1.07998 | 0.00155 | 0.016224 |
| MEPCE     | 1.07965 | 0.00325 | 0.027854 |

|            |         |         |          |
|------------|---------|---------|----------|
| PNRC2      | 1.07944 | 0.0006  | 0.008024 |
| UFC1       | 1.07944 | 0.0017  | 0.017361 |
| LANCL2     | 1.07652 | 0.0009  | 0.010731 |
| WDR47      | 1.07646 | 0.00155 | 0.016224 |
| FLCN       | 1.07627 | 0.00265 | 0.024071 |
| MOK        | 1.07551 | 0.00355 | 0.029785 |
| STAG2      | 1.07532 | 0.0009  | 0.010731 |
| ETV3       | 1.07458 | 0.00085 | 0.010312 |
| DEPDC7     | 1.07447 | 0.00505 | 0.038666 |
| ENO3       | 1.07402 | 0.0029  | 0.025597 |
| WDR45      | 1.07349 | 0.00165 | 0.017002 |
| TERF2IP    | 1.07274 | 0.001   | 0.011594 |
| NOTCH2NL   | 1.07257 | 0.00195 | 0.01938  |
| KDM5A      | 1.07192 | 0.00145 | 0.015348 |
| TMEM47     | 1.07152 | 0.0043  | 0.034308 |
| UBA1       | 1.07053 | 0.00165 | 0.017002 |
| HIST2H2AA3 | 1.0699  | 0.00145 | 0.015348 |
| CCDC90B    | 1.06897 | 0.0021  | 0.0204   |
| RIPK2      | 1.06832 | 0.0013  | 0.014165 |
| BACH1      | 1.06796 | 0.0011  | 0.012454 |
| CDC37L1    | 1.06676 | 0.0016  | 0.016584 |
| NRIP3      | 1.06663 | 0.00655 | 0.046613 |
| LRRC48     | 1.06583 | 0.00565 | 0.041892 |
| ZNF394     | 1.06554 | 0.00105 | 0.012007 |
| ABHD5      | 1.06506 | 0.0023  | 0.021759 |
| RGS20      | 1.0645  | 0.00255 | 0.023375 |
| RBBP6      | 1.06411 | 0.0048  | 0.037289 |
| IRGQ       | 1.06354 | 0.0007  | 0.008891 |
| IRF2       | 1.06329 | 0.0022  | 0.021101 |
| SUV420H1   | 1.06328 | 0.0014  | 0.014968 |
| MTF2       | 1.06294 | 0.0016  | 0.016584 |
| DNAJB6     | 1.06165 | 0.00105 | 0.012007 |
| FAM76B     | 1.06161 | 0.0033  | 0.028192 |
| PSME2      | 1.06133 | 0.0012  | 0.013303 |
| GATA3      | 1.06031 | 0.00395 | 0.032241 |
| PCDH12     | 1.05995 | 0.00555 | 0.041342 |
| RBM23      | 1.05877 | 0.00095 | 0.011119 |
| CDK17      | 1.05813 | 0.0015  | 0.015773 |
| OPTN       | 1.05809 | 0.0018  | 0.018195 |
| CNOT4      | 1.05765 | 0.00065 | 0.008431 |
| PSME4      | 1.05694 | 0.00115 | 0.012865 |
| CENPC1     | 1.05683 | 0.0037  | 0.030688 |
| DPM1       | 1.05582 | 0.00175 | 0.017791 |
| IRAK2      | 1.0557  | 0.00085 | 0.010312 |
| BRCC3      | 1.05497 | 0.00185 | 0.018595 |
| LIPT1      | 1.05492 | 0.00495 | 0.038212 |

|           |         |         |          |
|-----------|---------|---------|----------|
| DSP       | 1.05381 | 0.00095 | 0.011119 |
| C12orf61  | 1.05374 | 0.0053  | 0.040041 |
| ADNP2     | 1.05275 | 0.00105 | 0.012007 |
| HNRNPC    | 1.05255 | 0.00135 | 0.014531 |
| ZNF554    | 1.05234 | 0.0047  | 0.036745 |
| HIST1H2BO | 1.05175 | 0.001   | 0.011594 |
| STX10     | 1.05037 | 0.00585 | 0.042856 |
| PGGT1B    | 1.04999 | 0.0023  | 0.021759 |
| CHCHD7    | 1.04624 | 0.0051  | 0.038881 |
| CLTB      | 1.04547 | 0.00475 | 0.037027 |
| TAF7      | 1.04499 | 0.0011  | 0.012454 |
| ZNF518A   | 1.04463 | 0.00235 | 0.022088 |
| COQ7      | 1.04398 | 0.00285 | 0.025324 |
| ADNP      | 1.04333 | 0.00175 | 0.017791 |
| IKBKE     | 1.04287 | 0.00355 | 0.029785 |
| CTTNBP2NL | 1.04256 | 0.0012  | 0.013303 |
| RSF1      | 1.04171 | 0.00135 | 0.014531 |
| GCA       | 1.04169 | 0.0034  | 0.028922 |
| VAMP2     | 1.04085 | 0.00145 | 0.015348 |
| PNPLA2    | 1.04053 | 0.0025  | 0.023036 |
| PVRL2     | 1.0399  | 0.0027  | 0.024344 |
| IFNGR2    | 1.03974 | 0.00335 | 0.028542 |
| LRCH3     | 1.03872 | 0.00235 | 0.022088 |
| RRN3P1    | 1.03675 | 0.0042  | 0.033797 |
| MARCH5    | 1.03643 | 0.00365 | 0.030415 |
| CCNYL1    | 1.03637 | 0.0013  | 0.014165 |
| THSD4     | 1.03585 | 0.0015  | 0.015773 |
| SERINC1   | 1.03479 | 0.00255 | 0.023375 |
| ZNF711    | 1.03449 | 0.00525 | 0.039739 |
| CAV1      | 1.03425 | 0.00115 | 0.012865 |
| WBP5      | 1.03418 | 0.0062  | 0.044782 |
| TRIP11    | 1.03405 | 0.00085 | 0.010312 |
| RAPGEF6   | 1.03352 | 0.00135 | 0.014531 |
| TOPORS    | 1.03345 | 0.00205 | 0.020098 |
| AFTPH     | 1.03332 | 0.0016  | 0.016584 |
| ZNF674    | 1.03212 | 0.00425 | 0.034028 |
| ZFP37     | 1.03199 | 0.00545 | 0.040807 |
| CLDN1     | 1.0319  | 0.0009  | 0.010731 |
| RBM48     | 1.03107 | 0.0034  | 0.028922 |
| HNRNPH3   | 1.03065 | 0.00485 | 0.037622 |
| POFUT2    | 1.02969 | 0.00365 | 0.030415 |
| RFFL      | 1.02968 | 0.00525 | 0.039739 |
| TRPC1     | 1.02964 | 0.0048  | 0.037289 |
| SYAP1     | 1.02914 | 0.00135 | 0.014531 |
| ASH1L     | 1.02862 | 0.0022  | 0.021101 |
| RRAS2     | 1.02815 | 0.0042  | 0.033797 |

|              |         |         |          |
|--------------|---------|---------|----------|
| FAM210A      | 1.02813 | 0.0032  | 0.027485 |
| STK17B       | 1.02736 | 0.0022  | 0.021101 |
| LOC100130331 | 1.02716 | 0.00695 | 0.048678 |
| OTUD5        | 1.02681 | 0.002   | 0.01979  |
| CREM         | 1.02662 | 0.005   | 0.038449 |
| DDX39B       | 1.02658 | 0.0016  | 0.016584 |
| PBDC1        | 1.02601 | 0.0027  | 0.024344 |
| SPTLC1       | 1.02565 | 0.0051  | 0.038881 |
| NRG1         | 1.02545 | 0.0019  | 0.019025 |
| ARID2        | 1.02507 | 0.00145 | 0.015348 |
| CWF19L2      | 1.02503 | 0.00565 | 0.041892 |
| C3orf52      | 1.02482 | 0.00205 | 0.020098 |
| UBR5         | 1.02476 | 0.00135 | 0.014531 |
| ITSN1        | 1.02408 | 0.0029  | 0.025597 |
| AOC2         | 1.02368 | 0.0032  | 0.027485 |
| B3GNT5       | 1.02367 | 0.0049  | 0.0379   |
| TAB3         | 1.02172 | 0.00235 | 0.022088 |
| ANLN         | 1.02148 | 0.0054  | 0.040509 |
| ESCO1        | 1.02121 | 0.00285 | 0.025324 |
| ZNF350       | 1.02083 | 0.0032  | 0.027485 |
| EIF2AK3      | 1.01997 | 0.0014  | 0.014968 |
| SLC25A14     | 1.01909 | 0.0057  | 0.042028 |
| HIST1H2BM    | 1.01881 | 0.0021  | 0.0204   |
| ZRANB1       | 1.01832 | 0.00145 | 0.015348 |
| USP47        | 1.01795 | 0.00115 | 0.012865 |
| TES          | 1.01768 | 0.0017  | 0.017361 |
| ZBTB5        | 1.01748 | 0.00125 | 0.013761 |
| PSMC6        | 1.0172  | 0.0021  | 0.0204   |
| CAAP1        | 1.01698 | 0.0039  | 0.031948 |
| RBMXL1       | 1.0161  | 0.0029  | 0.025597 |
| MBD1         | 1.01599 | 0.00285 | 0.025324 |
| CSNK1A1      | 1.01587 | 0.00115 | 0.012865 |
| ABCF1        | 1.01484 | 0.0013  | 0.014165 |
| ARL6IP1      | 1.01484 | 0.0014  | 0.014968 |
| PAPOLA       | 1.01408 | 0.00195 | 0.01938  |
| SPAG1        | 1.01379 | 0.00305 | 0.026568 |
| SPRED1       | 1.01369 | 0.0021  | 0.0204   |
| SPPL2A       | 1.01218 | 0.0026  | 0.023711 |
| EGLN1        | 1.0119  | 0.00145 | 0.015348 |
| ZEB1         | 1.01124 | 0.00185 | 0.018595 |
| TRIO         | 1.01123 | 0.00275 | 0.024628 |
| DLGAP5       | 1.01118 | 0.0024  | 0.022413 |
| RAB8B        | 1.01055 | 0.00285 | 0.025324 |
| JHDM1D       | 1.00699 | 0.0025  | 0.023036 |
| SPATA2       | 1.0064  | 0.00255 | 0.023375 |
| RLIM         | 1.00612 | 0.00215 | 0.020747 |



|            |          |         |          |
|------------|----------|---------|----------|
| IER3       | 1.00567  | 0.00225 | 0.021413 |
| CHD4       | 1.00536  | 0.00215 | 0.020747 |
| HIST1H2BE  | 1.00498  | 0.0023  | 0.021759 |
| TCF12      | 1.00479  | 0.0025  | 0.023036 |
| PHTF1      | 1.00418  | 0.0035  | 0.02963  |
| LARP1B     | 1.0036   | 0.00635 | 0.045556 |
| TIFA       | 1.00221  | 0.00355 | 0.029785 |
| EPC2       | 1.00162  | 0.0021  | 0.0204   |
| HIST2H2BE  | 1.00097  | 0.0065  | 0.04634  |
| HIST2H2BF  | 1.0008   | 0.0052  | 0.039473 |
| NAIP       | 0.999877 | 0.00365 | 0.030415 |
| MUC13      | 0.999642 | 0.0044  | 0.034878 |
| AEBP2      | 0.998282 | 0.0037  | 0.030688 |
| POLR2M     | 0.996881 | 0.00225 | 0.021413 |
| ATP13A3    | 0.994164 | 0.00255 | 0.023375 |
| RAB21      | 0.992341 | 0.0018  | 0.018195 |
| UBE2J2     | 0.991635 | 0.0048  | 0.037289 |
| UBALD1     | 0.991004 | 0.00705 | 0.049162 |
| EDN1       | 0.990304 | 0.00205 | 0.020098 |
| PUM1       | 0.990153 | 0.0025  | 0.023036 |
| VCL        | 0.989227 | 0.00165 | 0.017002 |
| MTRF1L     | 0.98903  | 0.00235 | 0.022088 |
| WAC        | 0.988797 | 0.002   | 0.01979  |
| MARCH7     | 0.986871 | 0.00175 | 0.017791 |
| RC3H1      | 0.986259 | 0.00195 | 0.01938  |
| PRPF4B     | 0.985467 | 0.0028  | 0.025006 |
| ABCC9      | 0.985444 | 0.00535 | 0.040324 |
| SRGAP1     | 0.985043 | 0.0016  | 0.016584 |
| SPOP       | 0.984866 | 0.0025  | 0.023036 |
| PCBP2      | 0.983939 | 0.00515 | 0.039205 |
| AKAP10     | 0.983917 | 0.0014  | 0.014968 |
| SAP30BP    | 0.982956 | 0.00295 | 0.025924 |
| CLIC1      | 0.982553 | 0.00275 | 0.024628 |
| GMEB1      | 0.982541 | 0.003   | 0.026176 |
| EAPP       | 0.982111 | 0.0031  | 0.026901 |
| HIST2H2AA4 | 0.981612 | 0.0027  | 0.024344 |
| RHOB       | 0.981568 | 0.00265 | 0.024071 |
| RBM7       | 0.981293 | 0.00405 | 0.032906 |
| GAS5       | 0.980946 | 0.00405 | 0.032906 |
| CSDA       | 0.980387 | 0.0039  | 0.031948 |
| MORF4L2    | 0.979669 | 0.0024  | 0.022413 |
| CA8        | 0.979447 | 0.00425 | 0.034028 |
| RNF11      | 0.979298 | 0.0042  | 0.033797 |
| MFAP1      | 0.978604 | 0.0029  | 0.025597 |
| NDUFAF5    | 0.978308 | 0.0048  | 0.037289 |
| PPP1R15B   | 0.977785 | 0.00435 | 0.03462  |

|           |          |         |          |
|-----------|----------|---------|----------|
| WAPAL     | 0.977236 | 0.00225 | 0.021413 |
| USP12     | 0.976538 | 0.0038  | 0.031338 |
| ANKRD12   | 0.974578 | 0.0037  | 0.030688 |
| MON2      | 0.974177 | 0.003   | 0.026176 |
| ECD       | 0.973267 | 0.00255 | 0.023375 |
| ADIPOR2   | 0.972967 | 0.00235 | 0.022088 |
| CC2D1B    | 0.972353 | 0.00335 | 0.028542 |
| KBTBD2    | 0.971853 | 0.00205 | 0.020098 |
| DNAJB12   | 0.971629 | 0.0057  | 0.042028 |
| DYNC1I2   | 0.971472 | 0.00295 | 0.025924 |
| JUNB      | 0.970553 | 0.0026  | 0.023711 |
| PIK3C3    | 0.970347 | 0.00605 | 0.044018 |
| DICER1    | 0.970202 | 0.00535 | 0.040324 |
| MYNN      | 0.96913  | 0.00335 | 0.028542 |
| RAB3GAP1  | 0.968836 | 0.00205 | 0.020098 |
| HNRNPA2B1 | 0.967965 | 0.00635 | 0.045556 |
| SIX4      | 0.967922 | 0.0034  | 0.028922 |
| TMEM62    | 0.966622 | 0.005   | 0.038449 |
| ETF1      | 0.965757 | 0.0023  | 0.021759 |
| SLC41A2   | 0.964666 | 0.0048  | 0.037289 |
| RALGAPA1  | 0.964378 | 0.0025  | 0.023036 |
| GATAD2B   | 0.96342  | 0.0027  | 0.024344 |
| YTHDF3    | 0.962922 | 0.0029  | 0.025597 |
| POGZ      | 0.961314 | 0.00425 | 0.034028 |
| LINC00673 | 0.959827 | 0.003   | 0.026176 |
| FAM13B    | 0.95975  | 0.00305 | 0.026568 |
| C6orf48   | 0.959475 | 0.0029  | 0.025597 |
| SRSF4     | 0.959136 | 0.0043  | 0.034308 |
| SPPL3     | 0.958579 | 0.0057  | 0.042028 |
| NUPL1     | 0.958449 | 0.00255 | 0.023375 |
| OSTM1     | 0.958134 | 0.0063  | 0.04532  |
| LNPEP     | 0.956611 | 0.0044  | 0.034878 |
| CWC25     | 0.953406 | 0.00195 | 0.01938  |
| NKX3-1    | 0.953289 | 0.0038  | 0.031338 |
| NUSAP1    | 0.952982 | 0.0031  | 0.026901 |
| LINC00641 | 0.952481 | 0.0054  | 0.040509 |
| CYCS      | 0.951169 | 0.004   | 0.032616 |
| AGL       | 0.950046 | 0.00605 | 0.044018 |
| BTG2      | 0.94995  | 0.0043  | 0.034308 |
| HNRPDL    | 0.949317 | 0.00555 | 0.041342 |
| STAT3     | 0.948256 | 0.0032  | 0.027485 |
| GPATCH8   | 0.947647 | 0.0025  | 0.023036 |
| PAPD4     | 0.947612 | 0.0057  | 0.042028 |
| ATP6V1B2  | 0.946381 | 0.00305 | 0.026568 |
| MAMLD1    | 0.944165 | 0.006   | 0.043714 |
| RPS6KC1   | 0.944076 | 0.0035  | 0.02963  |

|           |          |         |          |
|-----------|----------|---------|----------|
| VDR       | 0.943429 | 0.00685 | 0.048253 |
| BTBD10    | 0.942926 | 0.0035  | 0.02963  |
| CADM1     | 0.942836 | 0.0069  | 0.048541 |
| DOCK4     | 0.942731 | 0.0045  | 0.035424 |
| NAA16     | 0.941588 | 0.0063  | 0.04532  |
| SH3KBP1   | 0.940829 | 0.00285 | 0.025324 |
| NFIL3     | 0.940595 | 0.0047  | 0.036745 |
| THOC2     | 0.938874 | 0.0032  | 0.027485 |
| PPP2CA    | 0.93882  | 0.00345 | 0.0293   |
| SETD2     | 0.938526 | 0.0032  | 0.027485 |
| PKN2      | 0.937846 | 0.0046  | 0.036087 |
| PTPRK     | 0.936384 | 0.00425 | 0.034028 |
| COPS2     | 0.935769 | 0.00615 | 0.044562 |
| SCAND3    | 0.935564 | 0.0057  | 0.042028 |
| COP55     | 0.935429 | 0.00355 | 0.029785 |
| ATF1      | 0.934967 | 0.0048  | 0.037289 |
| BNIP2     | 0.934399 | 0.00655 | 0.046613 |
| TMEM107   | 0.934017 | 0.0044  | 0.034878 |
| GOLGA4    | 0.933909 | 0.0041  | 0.033278 |
| PTPN14    | 0.933772 | 0.0027  | 0.024344 |
| APLP2     | 0.930615 | 0.0042  | 0.033797 |
| CAPZA1    | 0.928768 | 0.0038  | 0.031338 |
| SENP6     | 0.92855  | 0.00685 | 0.048253 |
| UHRF1BP1L | 0.928288 | 0.00615 | 0.044562 |
| ATF6      | 0.927796 | 0.00355 | 0.029785 |
| UBXN7     | 0.927623 | 0.00495 | 0.038212 |
| EED       | 0.926994 | 0.00455 | 0.0358   |
| ATAD1     | 0.925479 | 0.00445 | 0.035135 |
| SUPT6H    | 0.922388 | 0.0044  | 0.034878 |
| PPIG      | 0.921962 | 0.00535 | 0.040324 |
| AKIRIN1   | 0.921176 | 0.004   | 0.032616 |
| NCOA4     | 0.920568 | 0.00405 | 0.032906 |
| PELI2     | 0.919125 | 0.00695 | 0.048678 |
| SUZ12     | 0.918006 | 0.0053  | 0.040041 |
| DMTF1     | 0.917989 | 0.0047  | 0.036745 |
| MET       | 0.917499 | 0.0053  | 0.040041 |
| SRSF1     | 0.917184 | 0.00715 | 0.049599 |
| NEMF      | 0.9169   | 0.00625 | 0.045082 |
| SFPQ      | 0.915485 | 0.00385 | 0.031636 |
| SLTM      | 0.914833 | 0.0036  | 0.030077 |
| C12orf4   | 0.914347 | 0.00625 | 0.045082 |
| PPP1R12A  | 0.914225 | 0.0043  | 0.034308 |
| UFM1      | 0.914221 | 0.0062  | 0.044782 |
| TARDBP    | 0.914055 | 0.0042  | 0.033797 |
| BCL2L13   | 0.913588 | 0.00345 | 0.0293   |
| PPM1D     | 0.912624 | 0.00485 | 0.037622 |

|          |          |         |          |
|----------|----------|---------|----------|
| ITSN2    | 0.91259  | 0.00285 | 0.025324 |
| OAZ2     | 0.911731 | 0.00585 | 0.042856 |
| STAG1    | 0.911643 | 0.00435 | 0.03462  |
| STAU1    | 0.911319 | 0.00385 | 0.031636 |
| TBC1D22B | 0.910778 | 0.0065  | 0.04634  |
| BTBD1    | 0.910721 | 0.00415 | 0.033547 |
| DAGLB    | 0.910018 | 0.0063  | 0.04532  |
| CREB1    | 0.907635 | 0.0051  | 0.038881 |
| TCF7L2   | 0.905408 | 0.00375 | 0.031038 |
| UBXN1    | 0.904446 | 0.00555 | 0.041342 |
| IWS1     | 0.903814 | 0.00445 | 0.035135 |
| ALKBH1   | 0.900117 | 0.0045  | 0.035424 |
| SMCHD1   | 0.900114 | 0.00555 | 0.041342 |
| ZNF410   | 0.899236 | 0.0039  | 0.031948 |
| PARVA    | 0.898659 | 0.0067  | 0.047427 |
| FBXO28   | 0.897479 | 0.00435 | 0.03462  |
| TUG1     | 0.895126 | 0.0067  | 0.047427 |
| MAP3K7   | 0.893316 | 0.00575 | 0.04224  |
| RC3H2    | 0.891882 | 0.0051  | 0.038881 |
| CEP350   | 0.890641 | 0.00545 | 0.040807 |
| EMP3     | 0.889585 | 0.00695 | 0.048678 |
| TOR1B    | 0.88634  | 0.0059  | 0.043143 |
| TNKS2    | 0.884996 | 0.0049  | 0.0379   |
| CTR9     | 0.884741 | 0.0054  | 0.040509 |
| IP6K2    | 0.884159 | 0.0071  | 0.049381 |
| KIF5B    | 0.883184 | 0.00615 | 0.044562 |
| IST1     | 0.882733 | 0.0057  | 0.042028 |
| WEE1     | 0.882408 | 0.005   | 0.038449 |
| EAF1     | 0.88239  | 0.00535 | 0.040324 |
| TNKS     | 0.881736 | 0.00445 | 0.035135 |
| FJX1     | 0.881472 | 0.0072  | 0.049859 |
| RIPK1    | 0.880979 | 0.00585 | 0.042856 |
| MED1     | 0.880848 | 0.0066  | 0.046885 |
| PNP      | 0.880414 | 0.006   | 0.043714 |
| SVIL     | 0.879037 | 0.0054  | 0.040509 |
| PTPN21   | 0.877526 | 0.0058  | 0.042568 |
| KIAA0907 | 0.875833 | 0.0057  | 0.042028 |
| PAPOLG   | 0.874308 | 0.00605 | 0.044018 |
| MTMR9    | 0.87228  | 0.00575 | 0.04224  |
| MCU      | 0.870852 | 0.0061  | 0.044281 |
| ECT2     | 0.87073  | 0.0064  | 0.045812 |
| CHD1     | 0.869651 | 0.00665 | 0.047198 |
| NHS      | 0.866605 | 0.0065  | 0.04634  |
| TBX3     | 0.86516  | 0.0061  | 0.044281 |
| RBFOX2   | 0.86253  | 0.0059  | 0.043143 |
| HIST1H4B | 0.858592 | 0.00695 | 0.048678 |

|           |          |         |          |
|-----------|----------|---------|----------|
| FRYL      | 0.855451 | 0.00715 | 0.049599 |
| PSEN1     | 0.855309 | 0.0072  | 0.049859 |
| KIDINS220 | 0.853756 | 0.00675 | 0.047759 |
| RBBP5     | 0.851055 | 0.00695 | 0.048678 |
| SRSF7     | 0.844134 | 0.0063  | 0.04532  |
| PTK2      | 0.84144  | 0.00705 | 0.049162 |
| BPTF      | 0.838359 | 0.0072  | 0.049859 |
| CDCA5     | -0.85935 | 0.0071  | 0.049381 |
| KLF11     | -0.86587 | 0.00715 | 0.049599 |
| GPRIN3    | -0.86737 | 0.0061  | 0.044281 |
| NFE2L1    | -0.87342 | 0.0067  | 0.047427 |
| FADS1     | -0.8736  | 0.0068  | 0.048028 |
| GCNT3     | -0.8736  | 0.0046  | 0.036087 |
| CDCA4     | -0.88273 | 0.0057  | 0.042028 |
| MID1IP1   | -0.88344 | 0.00475 | 0.037027 |
| WWC3      | -0.88549 | 0.005   | 0.038449 |
| SCD       | -0.8859  | 0.0057  | 0.042028 |
| TRIM9     | -0.88653 | 0.00645 | 0.046066 |
| SRPRB     | -0.88879 | 0.0069  | 0.048541 |
| MCM10     | -0.89194 | 0.00505 | 0.038666 |
| PACSIN2   | -0.89236 | 0.0065  | 0.04634  |
| ARRDC2    | -0.89246 | 0.0066  | 0.046885 |
| NUDT19    | -0.89301 | 0.0049  | 0.0379   |
| LMNB2     | -0.89656 | 0.00645 | 0.046066 |
| FAM136A   | -0.90148 | 0.00555 | 0.041342 |
| ZNF749    | -0.90167 | 0.00645 | 0.046066 |
| GPI       | -0.90287 | 0.0071  | 0.049381 |
| TOR3A     | -0.90384 | 0.00595 | 0.043449 |
| SLC45A4   | -0.9043  | 0.0064  | 0.045812 |
| ARRB2     | -0.90937 | 0.00695 | 0.048678 |
| MTSS1L    | -0.90979 | 0.0068  | 0.048028 |
| LARP1     | -0.91376 | 0.00395 | 0.032241 |
| FOXE1     | -0.9166  | 0.00695 | 0.048678 |
| LRRC47    | -0.91668 | 0.0062  | 0.044782 |
| SLC4A2    | -0.9175  | 0.0062  | 0.044782 |
| VANGL1    | -0.9196  | 0.0051  | 0.038881 |
| KBTBD6    | -0.91962 | 0.00505 | 0.038666 |
| IMP3      | -0.91984 | 0.00425 | 0.034028 |
| IQGAP3    | -0.92095 | 0.00575 | 0.04224  |
| RIN2      | -0.92142 | 0.0037  | 0.030688 |
| KIAA0930  | -0.92152 | 0.0046  | 0.036087 |
| GAREML    | -0.92526 | 0.0064  | 0.045812 |
| RRS1      | -0.9255  | 0.006   | 0.043714 |
| MCM3      | -0.92706 | 0.0036  | 0.030077 |
| RPIA      | -0.93276 | 0.00615 | 0.044562 |
| ZNF607    | -0.93443 | 0.00635 | 0.045556 |

|          |          |         |          |
|----------|----------|---------|----------|
| C11orf95 | -0.9367  | 0.00505 | 0.038666 |
| EXD2     | -0.9398  | 0.0052  | 0.039473 |
| MCM6     | -0.94    | 0.0027  | 0.024344 |
| RSAD1    | -0.94052 | 0.0032  | 0.027485 |
| MRPS26   | -0.94136 | 0.0049  | 0.0379   |
| RHOBTB1  | -0.94366 | 0.0042  | 0.033797 |
| ATP5G1   | -0.94394 | 0.00555 | 0.041342 |
| TRMT61A  | -0.94562 | 0.0044  | 0.034878 |
| ACSS1    | -0.94649 | 0.0063  | 0.04532  |
| REEP4    | -0.947   | 0.0058  | 0.042568 |
| ZNF768   | -0.94834 | 0.00405 | 0.032906 |
| C1orf216 | -0.94998 | 0.005   | 0.038449 |
| FADD     | -0.9502  | 0.0025  | 0.023036 |
| SLC52A2  | -0.95534 | 0.0054  | 0.040509 |
| BCL7A    | -0.95589 | 0.0035  | 0.02963  |
| NIPSNAP1 | -0.95743 | 0.00665 | 0.047198 |
| IGSF11   | -0.95784 | 0.0063  | 0.04532  |
| KBTBD11  | -0.96038 | 0.00335 | 0.028542 |
| CNNM1    | -0.96086 | 0.0028  | 0.025006 |
| MANEAL   | -0.96116 | 0.0069  | 0.048541 |
| LBH      | -0.96255 | 0.00405 | 0.032906 |
| MRI1     | -0.96392 | 0.0056  | 0.041637 |
| CCNF     | -0.964   | 0.00355 | 0.029785 |
| MGST1    | -0.9671  | 0.0046  | 0.036087 |
| SPATA20  | -0.96732 | 0.00525 | 0.039739 |
| FAM213A  | -0.9702  | 0.0056  | 0.041637 |
| CA12     | -0.97038 | 0.00705 | 0.049162 |
| CYB561   | -0.97129 | 0.00295 | 0.025924 |
| APRT     | -0.9723  | 0.0054  | 0.040509 |
| AP1S1    | -0.97339 | 0.0047  | 0.036745 |
| PSAT1    | -0.97417 | 0.0037  | 0.030688 |
| ZNF30    | -0.97435 | 0.00685 | 0.048253 |
| EDEM2    | -0.97744 | 0.00575 | 0.04224  |
| WDR5     | -0.97934 | 0.0032  | 0.027485 |
| NEIL3    | -0.97945 | 0.0036  | 0.030077 |
| FBXW10   | -0.97962 | 0.00445 | 0.035135 |
| GAB2     | -0.98183 | 0.0025  | 0.023036 |
| TCF19    | -0.98251 | 0.0067  | 0.047427 |
| UBE2T    | -0.98265 | 0.00345 | 0.0293   |
| RAB26    | -0.98309 | 0.0028  | 0.025006 |
| ZNF343   | -0.98482 | 0.00215 | 0.020747 |
| TRAPPC1  | -0.98753 | 0.00435 | 0.03462  |
| PTCD2    | -0.98785 | 0.00625 | 0.045082 |
| TMTC4    | -0.98804 | 0.0054  | 0.040509 |
| LRP8     | -0.9883  | 0.0038  | 0.031338 |
| AES      | -0.98868 | 0.00555 | 0.041342 |

|          |          |         |          |
|----------|----------|---------|----------|
| KCTD1    | -0.98918 | 0.0026  | 0.023711 |
| ZC3HAV1L | -0.98955 | 0.00405 | 0.032906 |
| C17orf70 | -0.99086 | 0.0038  | 0.031338 |
| FECH     | -0.99098 | 0.00255 | 0.023375 |
| AMPD2    | -0.99153 | 0.0045  | 0.035424 |
| FAM129B  | -0.99241 | 0.00255 | 0.023375 |
| MAMDC4   | -0.99503 | 0.0057  | 0.042028 |
| PFN2     | -0.99508 | 0.00355 | 0.029785 |
| GIT1     | -0.99615 | 0.0037  | 0.030688 |
| BCAT1    | -0.99805 | 0.00475 | 0.037027 |
| OLFML2A  | -0.99879 | 0.00475 | 0.037027 |
| ZNF526   | -0.99898 | 0.00315 | 0.027261 |
| BLVRA    | -1.00095 | 0.00545 | 0.040807 |
| ZFP64    | -1.00102 | 0.00225 | 0.021413 |
| VOPP1    | -1.00181 | 0.00245 | 0.022773 |
| FIGNL1   | -1.00184 | 0.00265 | 0.024071 |
| CAD      | -1.00202 | 0.0022  | 0.021101 |
| MOCOS    | -1.00304 | 0.0042  | 0.033797 |
| NFIA     | -1.00324 | 0.00185 | 0.018595 |
| POP1     | -1.0043  | 0.00215 | 0.020747 |
| MRPL12   | -1.00531 | 0.00275 | 0.024628 |
| CCM2     | -1.00736 | 0.007   | 0.04892  |
| TNFRSF1A | -1.00776 | 0.0032  | 0.027485 |
| PIK3C2B  | -1.00783 | 0.0021  | 0.0204   |
| ADD2     | -1.00821 | 0.0016  | 0.016584 |
| RECQL4   | -1.0083  | 0.00355 | 0.029785 |
| POLR3K   | -1.00837 | 0.0055  | 0.041143 |
| MRM1     | -1.00927 | 0.00285 | 0.025324 |
| NAGA     | -1.01107 | 0.00715 | 0.049599 |
| MALL     | -1.01336 | 0.00355 | 0.029785 |
| CRTAP    | -1.01585 | 0.00145 | 0.015348 |
| CNTNAP1  | -1.01696 | 0.00505 | 0.038666 |
| FICD     | -1.01711 | 0.003   | 0.026176 |
| SLC35C1  | -1.01719 | 0.00245 | 0.022773 |
| SLC29A3  | -1.0173  | 0.00505 | 0.038666 |
| SNX18    | -1.01856 | 0.0049  | 0.0379   |
| STRA13   | -1.0194  | 0.00465 | 0.036443 |
| E2F8     | -1.01962 | 0.00295 | 0.025924 |
| NABP2    | -1.02046 | 0.0023  | 0.021759 |
| GID4     | -1.02106 | 0.00165 | 0.017002 |
| ALDH3B1  | -1.02121 | 0.0027  | 0.024344 |
| RNASEH2A | -1.02185 | 0.00535 | 0.040324 |
| KBTBD7   | -1.02374 | 0.0024  | 0.022413 |
| SRM      | -1.02387 | 0.0045  | 0.035424 |
| HEATR3   | -1.02447 | 0.00215 | 0.020747 |
| SLC27A4  | -1.02449 | 0.00245 | 0.022773 |

|            |          |         |          |
|------------|----------|---------|----------|
| FOXF2      | -1.02525 | 0.0051  | 0.038881 |
| ERP29      | -1.0253  | 0.0016  | 0.016584 |
| PCLO       | -1.02538 | 0.0067  | 0.047427 |
| LSM10      | -1.02583 | 0.007   | 0.04892  |
| CAT        | -1.02701 | 0.0028  | 0.025006 |
| FCHO1      | -1.02711 | 0.00715 | 0.049599 |
| NQO1       | -1.0301  | 0.003   | 0.026176 |
| ANKRD13D   | -1.03033 | 0.00315 | 0.027261 |
| POLRMT     | -1.03255 | 0.0038  | 0.031338 |
| ZNF598     | -1.03388 | 0.00215 | 0.020747 |
| TRIM35     | -1.03445 | 0.0016  | 0.016584 |
| NRSN2      | -1.0348  | 0.0033  | 0.028192 |
| APOBEC3C   | -1.03669 | 0.0051  | 0.038881 |
| RPS6KA4    | -1.03844 | 0.0032  | 0.027485 |
| CYFIP2     | -1.04086 | 0.0039  | 0.031948 |
| SCARA5     | -1.04226 | 0.00575 | 0.04224  |
| ST6GALNAC2 | -1.04243 | 0.00645 | 0.046066 |
| CYB5RL     | -1.04281 | 0.0032  | 0.027485 |
| MPI        | -1.04316 | 0.00245 | 0.022773 |
| ZNF786     | -1.04402 | 0.0019  | 0.019025 |
| HHIPL2     | -1.04497 | 0.005   | 0.038449 |
| PDXP       | -1.0458  | 0.0021  | 0.0204   |
| TP53I13    | -1.04581 | 0.0043  | 0.034308 |
| GTF2IRD1   | -1.0466  | 0.0032  | 0.027485 |
| STOX2      | -1.04803 | 0.0018  | 0.018195 |
| DCTPP1     | -1.04866 | 0.002   | 0.01979  |
| PGM1       | -1.05102 | 0.00425 | 0.034028 |
| PTGR1      | -1.05131 | 0.0032  | 0.027485 |
| FEN1       | -1.05221 | 0.0012  | 0.013303 |
| TSEN54     | -1.0525  | 0.00415 | 0.033547 |
| NUP210     | -1.05402 | 0.0017  | 0.017361 |
| TKT        | -1.05403 | 0.0059  | 0.043143 |
| RNF187     | -1.05449 | 0.0016  | 0.016584 |
| VKORC1     | -1.05517 | 0.00475 | 0.037027 |
| C9orf3     | -1.05677 | 0.0006  | 0.008024 |
| IGSF3      | -1.05701 | 0.0012  | 0.013303 |
| AHNAK2     | -1.05734 | 0.0044  | 0.034878 |
| ABCA3      | -1.05801 | 0.0022  | 0.021101 |
| NUMBL      | -1.05951 | 0.00105 | 0.012007 |
| TMED3      | -1.06005 | 0.00175 | 0.017791 |
| FUT1       | -1.06013 | 0.00715 | 0.049599 |
| RTKN       | -1.06193 | 0.00355 | 0.029785 |
| HDHD3      | -1.06231 | 0.00145 | 0.015348 |
| RBFA       | -1.06236 | 0.00135 | 0.014531 |
| EBPL       | -1.06249 | 0.00575 | 0.04224  |
| C19orf48   | -1.06271 | 0.00165 | 0.017002 |



|           |          |         |          |
|-----------|----------|---------|----------|
| CCDC51    | -1.06275 | 0.00225 | 0.021413 |
| FNDC8     | -1.06275 | 0.00265 | 0.024071 |
| EVPL      | -1.06279 | 0.00135 | 0.014531 |
| CHRNA     | -1.06398 | 0.00465 | 0.036443 |
| UCK2      | -1.06405 | 0.0008  | 0.009825 |
| MED22     | -1.06417 | 0.0011  | 0.012454 |
| ALDH1L2   | -1.06458 | 0.00225 | 0.021413 |
| MCM2      | -1.06467 | 0.0011  | 0.012454 |
| PDCD2L    | -1.0647  | 0.00155 | 0.016224 |
| EPS8L2    | -1.06649 | 0.0024  | 0.022413 |
| DGKG      | -1.06688 | 0.00145 | 0.015348 |
| PPP1R3E   | -1.06777 | 0.0024  | 0.022413 |
| ANK2      | -1.06898 | 0.0052  | 0.039473 |
| EPDR1     | -1.07043 | 0.00055 | 0.007519 |
| C1orf74   | -1.07156 | 0.0026  | 0.023711 |
| PREB      | -1.07414 | 0.00185 | 0.018595 |
| HTATSF1P2 | -1.07506 | 0.00085 | 0.010312 |
| B3GAT3    | -1.07514 | 0.00325 | 0.027854 |
| SDC3      | -1.07634 | 0.00445 | 0.035135 |
| PELO      | -1.07689 | 0.00065 | 0.008431 |
| ADORA2B   | -1.07708 | 0.00195 | 0.01938  |
| ST3GAL4   | -1.07876 | 0.005   | 0.038449 |
| E2F1      | -1.07878 | 0.00175 | 0.017791 |
| ABHD14B   | -1.08014 | 0.00275 | 0.024628 |
| PTCH1     | -1.08179 | 0.00205 | 0.020098 |
| HAGH      | -1.08207 | 0.0062  | 0.044782 |
| TUBAL3    | -1.08219 | 0.0039  | 0.031948 |
| PSMG3     | -1.08222 | 0.0027  | 0.024344 |
| NGFRAP1   | -1.08304 | 0.0025  | 0.023036 |
| AGAP3     | -1.08344 | 0.0023  | 0.021759 |
| TBC1D2B   | -1.08558 | 0.00115 | 0.012865 |
| AP3M2     | -1.08854 | 0.00095 | 0.011119 |
| FAM217B   | -1.08886 | 0.0068  | 0.048028 |
| XYLB      | -1.08891 | 0.00275 | 0.024628 |
| OXLD1     | -1.09008 | 0.00395 | 0.032241 |
| AMER1     | -1.0904  | 0.0008  | 0.009825 |
| DBN1      | -1.0905  | 0.0031  | 0.026901 |
| FGFR4     | -1.09148 | 0.0029  | 0.025597 |
| GPD1L     | -1.09212 | 0.0017  | 0.017361 |
| CHST3     | -1.09294 | 0.00065 | 0.008431 |
| TUB       | -1.0931  | 0.002   | 0.01979  |
| FADS2     | -1.09389 | 0.00125 | 0.013761 |
| PCBD1     | -1.09517 | 0.00075 | 0.009355 |
| NLE1      | -1.09531 | 0.0007  | 0.008891 |
| C20orf112 | -1.09675 | 0.00065 | 0.008431 |
| LEPREL4   | -1.09787 | 0.0009  | 0.010731 |

|              |          |         |          |
|--------------|----------|---------|----------|
| DAG1         | -1.09909 | 0.0007  | 0.008891 |
| RASSF6       | -1.09945 | 0.00415 | 0.033547 |
| SOGA1        | -1.10071 | 0.0016  | 0.016584 |
| TUBA1B       | -1.10177 | 0.00105 | 0.012007 |
| FOXO2        | -1.10205 | 0.00705 | 0.049162 |
| GGT1         | -1.10522 | 0.0024  | 0.022413 |
| PRDX1        | -1.10766 | 0.0008  | 0.009825 |
| GSR          | -1.10873 | 0.0005  | 0.006979 |
| RTN4RL2      | -1.11276 | 0.00095 | 0.011119 |
| PNMAL1       | -1.11327 | 0.00205 | 0.020098 |
| FAM174B      | -1.11409 | 0.00295 | 0.025924 |
| POC1A        | -1.11435 | 0.00355 | 0.029785 |
| HECTD3       | -1.11456 | 0.00165 | 0.017002 |
| TRIM16       | -1.11707 | 0.001   | 0.011594 |
| RALGDS       | -1.11778 | 0.00215 | 0.020747 |
| WIPF1        | -1.11861 | 0.00115 | 0.012865 |
| GIN5         | -1.11899 | 0.0015  | 0.015773 |
| TRIM65       | -1.11917 | 0.0005  | 0.006979 |
| PTPN18       | -1.12128 | 0.00155 | 0.016224 |
| PRRT3        | -1.12159 | 0.0029  | 0.025597 |
| ANKRD39      | -1.1218  | 0.00355 | 0.029785 |
| ORA13        | -1.12349 | 0.0036  | 0.030077 |
| PECR         | -1.12388 | 0.0013  | 0.014165 |
| SLC25A10     | -1.12462 | 0.00325 | 0.027854 |
| DTX4         | -1.1258  | 0.00105 | 0.012007 |
| PSRC1        | -1.12633 | 0.0017  | 0.017361 |
| STBD1        | -1.12717 | 0.00395 | 0.032241 |
| IDH1         | -1.12758 | 0.0004  | 0.005861 |
| C22orf29     | -1.12801 | 0.0007  | 0.008891 |
| BLOC1S4      | -1.12812 | 0.0021  | 0.0204   |
| TMEM106C     | -1.13022 | 0.00095 | 0.011119 |
| TALDO1       | -1.13038 | 0.0005  | 0.006979 |
| PDXK         | -1.13155 | 0.00105 | 0.012007 |
| LOC100506054 | -1.13207 | 0.00215 | 0.020747 |
| VLDLR        | -1.13368 | 0.00125 | 0.013761 |
| B3GALT6      | -1.13385 | 0.0017  | 0.017361 |
| FOXA2        | -1.13903 | 0.0005  | 0.006979 |
| MCM5         | -1.13978 | 0.00055 | 0.007519 |
| G6PD         | -1.14009 | 0.0026  | 0.023711 |
| ZNF239       | -1.14037 | 0.0037  | 0.030688 |
| DFNA5        | -1.14065 | 0.0021  | 0.0204   |
| XK           | -1.14092 | 0.007   | 0.04892  |
| NQO2         | -1.14274 | 0.0006  | 0.008024 |
| TECR         | -1.14542 | 0.00065 | 0.008431 |
| VPS37D       | -1.14688 | 0.0052  | 0.039473 |
| GLTPD1       | -1.1472  | 0.00205 | 0.020098 |

|           |          |         |          |
|-----------|----------|---------|----------|
| SCARB1    | -1.14751 | 0.00065 | 0.008431 |
| VAV3      | -1.14758 | 0.00105 | 0.012007 |
| CDRT1     | -1.14812 | 0.0007  | 0.008891 |
| LINC00842 | -1.14919 | 0.00355 | 0.029785 |
| LZTS2     | -1.15107 | 0.0024  | 0.022413 |
| KIF26A    | -1.15173 | 0.007   | 0.04892  |
| TMEM141   | -1.15222 | 0.0037  | 0.030688 |
| ISOC2     | -1.1525  | 0.0028  | 0.025006 |
| MSTO1     | -1.15335 | 0.00115 | 0.012865 |
| LRRC23    | -1.15407 | 0.00415 | 0.033547 |
| KCTD17    | -1.15511 | 0.00525 | 0.039739 |
| CDC25A    | -1.15568 | 0.0005  | 0.006979 |
| PACSIN3   | -1.15581 | 0.00225 | 0.021413 |
| CBX6      | -1.15592 | 0.0003  | 0.004684 |
| TP53I11   | -1.15653 | 0.00205 | 0.020098 |
| GEMIN4    | -1.15742 | 0.0003  | 0.004684 |
| USP51     | -1.15933 | 0.00365 | 0.030415 |
| BRI3BP    | -1.15997 | 0.0012  | 0.013303 |
| FBXL16    | -1.16087 | 0.00385 | 0.031636 |
| AKAP1     | -1.16163 | 0.0003  | 0.004684 |
| PKN1      | -1.16186 | 0.00075 | 0.009355 |
| PBXIP1    | -1.16194 | 0.00185 | 0.018595 |
| ZDHHC8    | -1.16259 | 0.00505 | 0.038666 |
| KCNK5     | -1.16275 | 0.00105 | 0.012007 |
| RGS3      | -1.16351 | 0.001   | 0.011594 |
| ABCC2     | -1.16386 | 0.0014  | 0.014968 |
| SLC19A1   | -1.1641  | 0.003   | 0.026176 |
| RABAC1    | -1.16486 | 0.00355 | 0.029785 |
| PPAP2C    | -1.16575 | 0.00195 | 0.01938  |
| CROT      | -1.16719 | 0.0047  | 0.036745 |
| SEL1L3    | -1.16774 | 0.0005  | 0.006979 |
| MCIN      | -1.16798 | 0.0045  | 0.035424 |
| FANCF     | -1.16834 | 0.0009  | 0.010731 |
| PHLDA3    | -1.1693  | 0.00095 | 0.011119 |
| HR        | -1.17015 | 0.001   | 0.011594 |
| MEST      | -1.17029 | 0.0064  | 0.045812 |
| ANK3      | -1.1732  | 0.0044  | 0.034878 |
| CTDSPL    | -1.17332 | 0.00175 | 0.017791 |
| SAPCD2    | -1.17349 | 0.0008  | 0.009825 |
| KIAA1161  | -1.17782 | 0.0011  | 0.012454 |
| CTSF      | -1.17825 | 0.0054  | 0.040509 |
| EXOSC5    | -1.1793  | 0.0013  | 0.014165 |
| GLT25D1   | -1.18038 | 0.0002  | 0.003428 |
| FAM20C    | -1.1806  | 0.0009  | 0.010731 |
| HGD       | -1.18141 | 0.0009  | 0.010731 |
| DDIT4L    | -1.18161 | 0.00425 | 0.034028 |

|          |          |          |          |
|----------|----------|----------|----------|
| SLC1A4   | -1.18215 | 0.0004   | 0.005861 |
| LEPREL2  | -1.1837  | 0.0025   | 0.023036 |
| INF2     | -1.18385 | 0.00265  | 0.024071 |
| CLPP     | -1.18395 | 0.00375  | 0.031038 |
| SLC5A11  | -1.18476 | 0.00115  | 0.012865 |
| ZNF362   | -1.18534 | 0.0012   | 0.013303 |
| CERCAM   | -1.18605 | 0.00205  | 0.020098 |
| PLD6     | -1.18662 | 0.00025  | 0.004092 |
| C11orf45 | -1.18709 | 0.00415  | 0.033547 |
| ZNF287   | -1.18982 | 0.0011   | 0.012454 |
| CENPB    | -1.18987 | 0.00045  | 0.006411 |
| SIGMAR1  | -1.19086 | 0.00025  | 0.004092 |
| SKIDA1   | -1.19335 | 0.00125  | 0.013761 |
| KEAP1    | -1.19344 | 0.00025  | 0.004092 |
| KANK2    | -1.1937  | 0.0003   | 0.004684 |
| ZBTB14   | -1.19374 | 0.0009   | 0.010731 |
| CSRP2BP  | -1.19632 | 0.0031   | 0.026901 |
| VPS26B   | -1.19639 | 0.00095  | 0.011119 |
| UNKL     | -1.19706 | 0.0004   | 0.005861 |
| ZBTB12   | -1.20039 | 0.00405  | 0.032906 |
| C15orf39 | -1.20073 | 0.00065  | 0.008431 |
| GPR135   | -1.2009  | 0.00115  | 0.012865 |
| GAMT     | -1.20101 | 0.00655  | 0.046613 |
| TMEM177  | -1.20353 | 0.00055  | 0.007519 |
| KIAA0319 | -1.20446 | 0.00025  | 0.004092 |
| DSCAML1  | -1.20458 | 0.0033   | 0.028192 |
| KCNG1    | -1.2062  | 0.00285  | 0.025324 |
| FAM86EP  | -1.20776 | 0.0006   | 0.008024 |
| IGSF8    | -1.20966 | 0.00505  | 0.038666 |
| FBXW5    | -1.20989 | 0.00055  | 0.007519 |
| GPT2     | -1.21377 | 0.0002   | 0.003428 |
| THNSL1   | -1.21736 | 0.00425  | 0.034028 |
| GAL3ST1  | -1.21773 | 0.00285  | 0.025324 |
| RGS19    | -1.21849 | 0.00225  | 0.021413 |
| CDC42EP1 | -1.21999 | 0.0004   | 0.005861 |
| PGP      | -1.2211  | 0.0003   | 0.004684 |
| CYP4F11  | -1.22257 | 5.00E-05 | 0.001089 |
| HNF1A    | -1.22288 | 0.00015  | 0.002736 |
| MYLK     | -1.22373 | 0.00235  | 0.022088 |
| AGR2     | -1.22487 | 0.0005   | 0.006979 |
| AKR1B10  | -1.22576 | 0.0026   | 0.023711 |
| ZNF395   | -1.2272  | 0.00035  | 0.005299 |
| NAAA     | -1.22737 | 0.0015   | 0.015773 |
| TRIM16L  | -1.22744 | 0.0004   | 0.005861 |
| FAM102A  | -1.228   | 0.00035  | 0.005299 |
| SLC45A1  | -1.2288  | 0.0032   | 0.027485 |

|           |          |         |          |
|-----------|----------|---------|----------|
| DHRS13    | -1.22925 | 0.0025  | 0.023036 |
| DHCR24    | -1.22952 | 0.00015 | 0.002736 |
| SLC16A13  | -1.23029 | 0.00105 | 0.012007 |
| KIF21B    | -1.23059 | 0.00045 | 0.006411 |
| DISP2     | -1.23359 | 0.0062  | 0.044782 |
| GATA2     | -1.23427 | 0.00235 | 0.022088 |
| AKR1A1    | -1.23558 | 0.00045 | 0.006411 |
| EPHB4     | -1.23628 | 0.0004  | 0.005861 |
| TRIM17    | -1.23777 | 0.0013  | 0.014165 |
| SCARA3    | -1.23958 | 0.0007  | 0.008891 |
| KLHL31    | -1.23988 | 0.00395 | 0.032241 |
| HRAS      | -1.2403  | 0.0015  | 0.015773 |
| MXD4      | -1.24167 | 0.001   | 0.011594 |
| PAQR9     | -1.24217 | 0.0007  | 0.008891 |
| FLYWCH1   | -1.24277 | 0.00065 | 0.008431 |
| PCSK9     | -1.24279 | 0.0022  | 0.021101 |
| C1orf106  | -1.24347 | 0.0004  | 0.005861 |
| PNMA2     | -1.24368 | 0.0001  | 0.001954 |
| FXYD2     | -1.2445  | 0.00115 | 0.012865 |
| LOC388906 | -1.24468 | 0.00435 | 0.03462  |
| LOC643401 | -1.24565 | 0.00095 | 0.011119 |
| SIRPA     | -1.24588 | 0.00025 | 0.004092 |
| FAM155B   | -1.24887 | 0.0005  | 0.006979 |
| ASB13     | -1.24912 | 0.00045 | 0.006411 |
| CELSR2    | -1.24962 | 0.00095 | 0.011119 |
| DLX4      | -1.24992 | 0.00315 | 0.027261 |
| C8orf47   | -1.25062 | 0.0036  | 0.030077 |
| SORBS3    | -1.25085 | 0.0005  | 0.006979 |
| BLVRB     | -1.25146 | 0.0001  | 0.001954 |
| RNFT2     | -1.25286 | 0.0003  | 0.004684 |
| NDUFB10   | -1.25306 | 0.0009  | 0.010731 |
| MAZ       | -1.25456 | 0.00015 | 0.002736 |
| MANSC1    | -1.25568 | 0.00085 | 0.010312 |
| TMEM9     | -1.25592 | 0.0003  | 0.004684 |
| ZNF219    | -1.25684 | 0.0044  | 0.034878 |
| C20orf27  | -1.2576  | 0.0004  | 0.005861 |
| CKAP4     | -1.25937 | 0.00025 | 0.004092 |
| KLF13     | -1.25947 | 0.0001  | 0.001954 |
| MLLT11    | -1.26182 | 0.0002  | 0.003428 |
| SLC46A1   | -1.26192 | 0.0005  | 0.006979 |
| DNASE2    | -1.26262 | 0.00025 | 0.004092 |
| TMC4      | -1.26379 | 0.00315 | 0.027261 |
| KRT86     | -1.26572 | 0.00135 | 0.014531 |
| LOC348761 | -1.26841 | 0.0061  | 0.044281 |
| RAB3D     | -1.27063 | 0.0003  | 0.004684 |
| ZBTB7B    | -1.27071 | 0.0001  | 0.001954 |

|           |          |          |          |
|-----------|----------|----------|----------|
| DNLZ      | -1.27076 | 0.0067   | 0.047427 |
| CBX8      | -1.27132 | 0.00035  | 0.005299 |
| SMAD6     | -1.27232 | 0.0003   | 0.004684 |
| SPP1      | -1.27458 | 5.00E-05 | 0.001089 |
| ZNF48     | -1.27565 | 0.0005   | 0.006979 |
| HNF4A     | -1.27612 | 0.0015   | 0.015773 |
| C9orf69   | -1.28022 | 0.00025  | 0.004092 |
| TUBB      | -1.28443 | 0.00025  | 0.004092 |
| SPC24     | -1.28595 | 0.0024   | 0.022413 |
| CDCA7     | -1.28738 | 0.00015  | 0.002736 |
| MNX1      | -1.2881  | 0.0019   | 0.019025 |
| CBS       | -1.2885  | 0.00035  | 0.005299 |
| GSTM4     | -1.29114 | 0.00495  | 0.038212 |
| TMEM161A  | -1.2917  | 0.00235  | 0.022088 |
| CEBPA     | -1.29229 | 0.00015  | 0.002736 |
| FAM57A    | -1.2925  | 0.00015  | 0.002736 |
| ZNF469    | -1.2928  | 5.00E-05 | 0.001089 |
| PPP1R26   | -1.29435 | 5.00E-05 | 0.001089 |
| NCS1      | -1.29548 | 0.00015  | 0.002736 |
| C12orf68  | -1.29573 | 0.0057   | 0.042028 |
| LPCAT4    | -1.29639 | 0.0002   | 0.003428 |
| HTR1D     | -1.29919 | 0.00025  | 0.004092 |
| SLC13A4   | -1.29925 | 0.0056   | 0.041637 |
| LOC257396 | -1.30034 | 0.0005   | 0.006979 |
| CAMKK1    | -1.30114 | 0.0003   | 0.004684 |
| METRN     | -1.30216 | 0.00245  | 0.022773 |
| TTLL6     | -1.30299 | 0.00235  | 0.022088 |
| C16orf59  | -1.30376 | 0.0006   | 0.008024 |
| CDCA3     | -1.30385 | 0.0001   | 0.001954 |
| HPS6      | -1.30435 | 0.00015  | 0.002736 |
| ZNF792    | -1.30529 | 0.0002   | 0.003428 |
| AGPAT2    | -1.30859 | 5.00E-05 | 0.001089 |
| TRAPPC5   | -1.30947 | 0.0009   | 0.010731 |
| SMO       | -1.30985 | 0.0003   | 0.004684 |
| ABHD15    | -1.31239 | 5.00E-05 | 0.001089 |
| TIGD5     | -1.31239 | 0.00025  | 0.004092 |
| C3orf72   | -1.31275 | 0.0011   | 0.012454 |
| GTDC2     | -1.31408 | 0.0006   | 0.008024 |
| MRPL24    | -1.31541 | 0.00015  | 0.002736 |
| SLC29A1   | -1.31612 | 0.00025  | 0.004092 |
| C1QTNF6   | -1.31892 | 0.00105  | 0.012007 |
| UNG       | -1.32349 | 0.00035  | 0.005299 |
| HILPDA    | -1.32683 | 0.0001   | 0.001954 |
| CORO2A    | -1.32731 | 0.0002   | 0.003428 |
| CDT1      | -1.32738 | 0.00015  | 0.002736 |
| HNF1B     | -1.32817 | 5.00E-05 | 0.001089 |

|          |          |          |          |
|----------|----------|----------|----------|
| PODXL2   | -1.32876 | 0.0017   | 0.017361 |
| GPC1     | -1.32935 | 0.00015  | 0.002736 |
| CPLX2    | -1.33059 | 0.0003   | 0.004684 |
| SAC3D1   | -1.3308  | 0.00445  | 0.035135 |
| CDR2L    | -1.33099 | 0.0001   | 0.001954 |
| C1orf220 | -1.3322  | 0.00065  | 0.008431 |
| SMKR1    | -1.33222 | 0.00695  | 0.048678 |
| HJURP    | -1.33316 | 0.00015  | 0.002736 |
| ID1      | -1.33326 | 0.0002   | 0.003428 |
| PGD      | -1.33486 | 0.0002   | 0.003428 |
| RAP1GAP  | -1.33572 | 0.0002   | 0.003428 |
| NR2F6    | -1.33602 | 0.0001   | 0.001954 |
| CAPN5    | -1.33662 | 0.0003   | 0.004684 |
| SLC48A1  | -1.33713 | 0.0031   | 0.026901 |
| PHGDH    | -1.33789 | 0.00015  | 0.002736 |
| GALNT12  | -1.33847 | 0.0051   | 0.038881 |
| SNX33    | -1.33952 | 0.0002   | 0.003428 |
| SLC47A2  | -1.34236 | 0.00145  | 0.015348 |
| MFSD3    | -1.34346 | 0.00065  | 0.008431 |
| NEURL1B  | -1.34352 | 0.0014   | 0.014968 |
| CCNJL    | -1.34364 | 0.00015  | 0.002736 |
| GNB3     | -1.34429 | 0.00135  | 0.014531 |
| BCRP2    | -1.34544 | 0.00545  | 0.040807 |
| MAMSTR   | -1.34802 | 0.00395  | 0.032241 |
| C15orf55 | -1.34865 | 0.00415  | 0.033547 |
| NAT8L    | -1.34956 | 0.0003   | 0.004684 |
| SLC9A3R2 | -1.35009 | 0.00095  | 0.011119 |
| VIL1     | -1.35083 | 0.00695  | 0.048678 |
| EPHX1    | -1.35332 | 0.00025  | 0.004092 |
| FGFR3    | -1.35351 | 0.00105  | 0.012007 |
| PIR      | -1.35762 | 0.00115  | 0.012865 |
| TRIM7    | -1.35817 | 0.00125  | 0.013761 |
| TMPRSS6  | -1.35854 | 0.00595  | 0.043449 |
| SKP2     | -1.35859 | 0.0012   | 0.013303 |
| B4GALNT1 | -1.35879 | 0.0002   | 0.003428 |
| RAB20    | -1.35909 | 0.0024   | 0.022413 |
| CARNS1   | -1.3605  | 0.0062   | 0.044782 |
| JDP2     | -1.36202 | 5.00E-05 | 0.001089 |
| CEND1    | -1.36485 | 0.0043   | 0.034308 |
| TUSC1    | -1.36519 | 0.00105  | 0.012007 |
| MSC      | -1.36685 | 0.00025  | 0.004092 |
| SLC27A2  | -1.36815 | 0.00035  | 0.005299 |
| LRP3     | -1.36896 | 0.0002   | 0.003428 |
| C5orf4   | -1.37208 | 0.00035  | 0.005299 |
| DHODH    | -1.37348 | 5.00E-05 | 0.001089 |
| ZFP69B   | -1.37371 | 0.00115  | 0.012865 |

|              |          |          |          |
|--------------|----------|----------|----------|
| LRRC16B      | -1.37411 | 0.00215  | 0.020747 |
| ANKRD2       | -1.37482 | 0.0036   | 0.030077 |
| FAM64A       | -1.37769 | 0.0002   | 0.003428 |
| MARCH1       | -1.37986 | 0.0008   | 0.009825 |
| HSD17B1      | -1.38369 | 0.00015  | 0.002736 |
| DGCR5        | -1.38908 | 0.00095  | 0.011119 |
| AMBP         | -1.39141 | 0.0017   | 0.017361 |
| MIRLET7BHG   | -1.39339 | 5.00E-05 | 0.001089 |
| KCTD15       | -1.39898 | 5.00E-05 | 0.001089 |
| EGFL7        | -1.39901 | 0.00115  | 0.012865 |
| MMP24        | -1.39999 | 0.0001   | 0.001954 |
| LOC284798    | -1.40208 | 0.00655  | 0.046613 |
| GATS         | -1.40209 | 0.0006   | 0.008024 |
| CENPM        | -1.40288 | 0.0008   | 0.009825 |
| CBX7         | -1.4048  | 0.0006   | 0.008024 |
| LOC100129726 | -1.40767 | 0.00025  | 0.004092 |
| EPHX2        | -1.40781 | 0.00045  | 0.006411 |
| HYAL1        | -1.40799 | 0.0011   | 0.012454 |
| PRODH2       | -1.40807 | 0.0066   | 0.046885 |
| C2orf72      | -1.40973 | 5.00E-05 | 0.001089 |
| NME4         | -1.41007 | 5.00E-05 | 0.001089 |
| LIPT2        | -1.41365 | 0.00225  | 0.021413 |
| GSTP1        | -1.41547 | 5.00E-05 | 0.001089 |
| MRPS34       | -1.41568 | 5.00E-05 | 0.001089 |
| DIO3OS       | -1.41573 | 0.00575  | 0.04224  |
| ABHD4        | -1.4192  | 5.00E-05 | 0.001089 |
| C10orf35     | -1.4225  | 0.00015  | 0.002736 |
| SMARCD3      | -1.42438 | 0.00025  | 0.004092 |
| ARHGEF37     | -1.4255  | 0.0003   | 0.004684 |
| GDAP1L1      | -1.42704 | 0.00295  | 0.025924 |
| BRWD1-IT2    | -1.42721 | 0.00425  | 0.034028 |
| HENMT1       | -1.42879 | 0.00165  | 0.017002 |
| ALDH1A1      | -1.42974 | 0.00025  | 0.004092 |
| APOH         | -1.4311  | 0.0029   | 0.025597 |
| SLCO2B1      | -1.43256 | 0.00075  | 0.009355 |
| F12          | -1.43743 | 0.00075  | 0.009355 |
| CDA          | -1.44026 | 0.00245  | 0.022773 |
| RIMS3        | -1.44215 | 0.0001   | 0.001954 |
| CDPF1        | -1.44296 | 0.00065  | 0.008431 |
| TMEM102      | -1.44523 | 0.0004   | 0.005861 |
| CBR1         | -1.44554 | 5.00E-05 | 0.001089 |
| LENEP        | -1.44871 | 0.0023   | 0.021759 |
| SDC1         | -1.44991 | 5.00E-05 | 0.001089 |
| KLHL35       | -1.45052 | 0.00205  | 0.020098 |
| SLC2A4RG     | -1.45062 | 0.00445  | 0.035135 |
| TMEM246      | -1.4523  | 5.00E-05 | 0.001089 |



|           |          |          |          |
|-----------|----------|----------|----------|
| NDUFB7    | -1.45425 | 0.00035  | 0.005299 |
| FGG       | -1.45455 | 0.0008   | 0.009825 |
| RPP25     | -1.45653 | 5.00E-05 | 0.001089 |
| NME3      | -1.45882 | 0.00055  | 0.007519 |
| AKR1C4    | -1.45945 | 0.0001   | 0.001954 |
| AKR1B15   | -1.46134 | 5.00E-05 | 0.001089 |
| HOXB13    | -1.46148 | 0.0003   | 0.004684 |
| EPN3      | -1.46193 | 0.00035  | 0.005299 |
| DCLRE1B   | -1.46354 | 5.00E-05 | 0.001089 |
| IDH2      | -1.46374 | 0.0003   | 0.004684 |
| CDH1      | -1.46665 | 5.00E-05 | 0.001089 |
| ZBTB47    | -1.46685 | 5.00E-05 | 0.001089 |
| ALDH1B1   | -1.46793 | 5.00E-05 | 0.001089 |
| GAS2L1    | -1.46856 | 0.0004   | 0.005861 |
| DGCR6     | -1.46879 | 0.00255  | 0.023375 |
| FAM226B   | -1.47295 | 0.0021   | 0.0204   |
| SIRPB1    | -1.47446 | 0.00195  | 0.01938  |
| F8A1,F8A3 | -1.4746  | 0.00385  | 0.031636 |
| S100P     | -1.47635 | 5.00E-05 | 0.001089 |
| TEX40     | -1.47692 | 0.0046   | 0.036087 |
| FAM86C2P  | -1.47866 | 0.0001   | 0.001954 |
| P2RY6     | -1.47923 | 5.00E-05 | 0.001089 |
| WNT10B    | -1.47961 | 0.00125  | 0.013761 |
| ZNF488    | -1.48612 | 5.00E-05 | 0.001089 |
| TMEM139   | -1.48713 | 0.0019   | 0.019025 |
| HINT2     | -1.48795 | 0.0001   | 0.001954 |
| RAB40B    | -1.48836 | 0.00065  | 0.008431 |
| TSKU      | -1.48958 | 0.0002   | 0.003428 |
| NROB1     | -1.49427 | 5.00E-05 | 0.001089 |
| ADCK2     | -1.49579 | 0.0001   | 0.001954 |
| AKNA      | -1.49694 | 5.00E-05 | 0.001089 |
| PLEKHH3   | -1.49748 | 5.00E-05 | 0.001089 |
| GJD3      | -1.50215 | 5.00E-05 | 0.001089 |
| ACOT11    | -1.50402 | 0.00635  | 0.045556 |
| SYBU      | -1.50416 | 5.00E-05 | 0.001089 |
| TSPO      | -1.50604 | 0.0006   | 0.008024 |
| LRRC20    | -1.50653 | 5.00E-05 | 0.001089 |
| TTLL12    | -1.50932 | 5.00E-05 | 0.001089 |
| LHPP      | -1.51042 | 0.00065  | 0.008431 |
| S1PR5     | -1.51097 | 0.0005   | 0.006979 |
| SOX12     | -1.51332 | 5.00E-05 | 0.001089 |
| UFSP1     | -1.51358 | 0.0004   | 0.005861 |
| EIF4EBP1  | -1.51546 | 5.00E-05 | 0.001089 |
| SNTB1     | -1.51892 | 5.00E-05 | 0.001089 |
| THEM6     | -1.51967 | 5.00E-05 | 0.001089 |
| PIM1      | -1.51999 | 5.00E-05 | 0.001089 |

|              |          |          |          |
|--------------|----------|----------|----------|
| FLVCR1-AS1   | -1.52177 | 0.00085  | 0.010312 |
| MXRA8        | -1.52256 | 0.0025   | 0.023036 |
| PLEKHF1      | -1.5233  | 0.00015  | 0.002736 |
| NTN3         | -1.52543 | 0.00185  | 0.018595 |
| DEPTOR       | -1.52823 | 0.0023   | 0.021759 |
| PRRG2        | -1.53379 | 0.00685  | 0.048253 |
| LOC100505761 | -1.53766 | 0.0008   | 0.009825 |
| SYTL1        | -1.53995 | 0.0064   | 0.045812 |
| MARVELD1     | -1.54128 | 5.00E-05 | 0.001089 |
| LOC440518    | -1.54776 | 0.00035  | 0.005299 |
| P2RX2        | -1.54788 | 0.0017   | 0.017361 |
| NS3BP        | -1.54849 | 5.00E-05 | 0.001089 |
| TP53TG1      | -1.54905 | 0.0003   | 0.004684 |
| GATSL2       | -1.55145 | 0.0035   | 0.02963  |
| GALK1        | -1.55373 | 0.00015  | 0.002736 |
| SLC16A14     | -1.55552 | 0.0006   | 0.008024 |
| ZNF232       | -1.55612 | 0.00015  | 0.002736 |
| F2RL2        | -1.55634 | 0.0002   | 0.003428 |
| SLC40A1      | -1.55639 | 5.00E-05 | 0.001089 |
| SLC29A4      | -1.55681 | 0.0005   | 0.006979 |
| RGS14        | -1.56101 | 0.00065  | 0.008431 |
| MAFG-AS1     | -1.56356 | 5.00E-05 | 0.001089 |
| AKR1C3       | -1.56418 | 5.00E-05 | 0.001089 |
| UBL4A        | -1.5658  | 5.00E-05 | 0.001089 |
| CFD          | -1.56838 | 0.00145  | 0.015348 |
| MATN2        | -1.56886 | 0.0002   | 0.003428 |
| GPR20        | -1.57126 | 0.0007   | 0.008891 |
| IGSF23       | -1.57171 | 0.00275  | 0.024628 |
| TMEM105      | -1.57214 | 0.00095  | 0.011119 |
| RPUSD1       | -1.57219 | 5.00E-05 | 0.001089 |
| ZNF688       | -1.57351 | 0.00055  | 0.007519 |
| CYP4F12      | -1.57483 | 0.00105  | 0.012007 |
| GPT          | -1.57537 | 0.0005   | 0.006979 |
| LINC00235    | -1.57836 | 0.00195  | 0.01938  |
| SULT2B1      | -1.57876 | 0.00015  | 0.002736 |
| ASIC5        | -1.58058 | 0.00135  | 0.014531 |
| PARD6A       | -1.58639 | 0.0007   | 0.008891 |
| PWWP2B       | -1.58847 | 5.00E-05 | 0.001089 |
| HSPA12B      | -1.58951 | 5.00E-05 | 0.001089 |
| PRODH        | -1.59292 | 0.0026   | 0.023711 |
| LOC151009    | -1.59562 | 0.00295  | 0.025924 |
| GPR162       | -1.59677 | 0.00015  | 0.002736 |
| SDR42E1      | -1.59732 | 0.00095  | 0.011119 |
| MPST         | -1.59789 | 0.003    | 0.026176 |
| PCYOX1L      | -1.60115 | 0.0001   | 0.001954 |
| ACSBG2       | -1.60656 | 0.00515  | 0.039205 |

|            |          |          |          |
|------------|----------|----------|----------|
| RERG       | -1.60829 | 0.00135  | 0.014531 |
| ZNF467     | -1.62272 | 0.0045   | 0.035424 |
| CRIP2      | -1.62462 | 0.0015   | 0.015773 |
| SLC7A5     | -1.62569 | 0.0002   | 0.003428 |
| PYCR1      | -1.62671 | 5.00E-05 | 0.001089 |
| FGA        | -1.62685 | 5.00E-05 | 0.001089 |
| IMPA2      | -1.62997 | 0.0001   | 0.001954 |
| INHBB      | -1.63015 | 5.00E-05 | 0.001089 |
| NXPH4      | -1.63201 | 0.003    | 0.026176 |
| AKR1C1     | -1.6321  | 5.00E-05 | 0.001089 |
| TST        | -1.63754 | 0.00065  | 0.008431 |
| ZNF71      | -1.63943 | 5.00E-05 | 0.001089 |
| LOC440894  | -1.64078 | 5.00E-05 | 0.001089 |
| TRIB3      | -1.64447 | 5.00E-05 | 0.001089 |
| ITGAD      | -1.64615 | 0.00075  | 0.009355 |
| FAM194A    | -1.64646 | 0.00095  | 0.011119 |
| ZBTB32     | -1.65142 | 5.00E-05 | 0.001089 |
| NINJ1      | -1.65606 | 5.00E-05 | 0.001089 |
| RAB37      | -1.66769 | 0.00025  | 0.004092 |
| RAB3IL1    | -1.66816 | 5.00E-05 | 0.001089 |
| VWA1       | -1.67644 | 0.0002   | 0.003428 |
| KRT83      | -1.67848 | 0.00035  | 0.005299 |
| HNF1A-AS1  | -1.68163 | 5.00E-05 | 0.001089 |
| ANXA13     | -1.68359 | 0.00035  | 0.005299 |
| PIGZ       | -1.68544 | 0.00185  | 0.018595 |
| ST6GALNAC4 | -1.68675 | 5.00E-05 | 0.001089 |
| SNN        | -1.68829 | 0.00705  | 0.049162 |
| ATP6V0E2   | -1.68932 | 0.00085  | 0.010312 |
| GATSL1     | -1.69282 | 0.00065  | 0.008431 |
| PNMA6C     | -1.69366 | 0.00125  | 0.013761 |
| LOC148696  | -1.6999  | 5.00E-05 | 0.001089 |
| CEBPA-AS1  | -1.7016  | 5.00E-05 | 0.001089 |
| SLC7A7     | -1.70501 | 5.00E-05 | 0.001089 |
| DUSP23     | -1.70879 | 0.00015  | 0.002736 |
| LMO1       | -1.71217 | 0.00565  | 0.041892 |
| CYP4F3     | -1.71299 | 5.00E-05 | 0.001089 |
| LDHD       | -1.71527 | 0.0022   | 0.021101 |
| RASSF7     | -1.71573 | 5.00E-05 | 0.001089 |
| LOC283710  | -1.71812 | 0.00565  | 0.041892 |
| DPYSL2     | -1.71827 | 5.00E-05 | 0.001089 |
| SASH3      | -1.71885 | 0.0018   | 0.018195 |
| KAZALD1    | -1.71888 | 5.00E-05 | 0.001089 |
| KRT85      | -1.71962 | 0.0016   | 0.016584 |
| PROC       | -1.72485 | 0.0002   | 0.003428 |
| SLC26A1    | -1.72987 | 0.00035  | 0.005299 |
| SPDEF      | -1.73698 | 0.0003   | 0.004684 |

|           |          |          |          |
|-----------|----------|----------|----------|
| PPYR1     | -1.74183 | 5.00E-05 | 0.001089 |
| PAQR4     | -1.75041 | 5.00E-05 | 0.001089 |
| HPDL      | -1.75174 | 0.0006   | 0.008024 |
| SRXN1     | -1.76096 | 5.00E-05 | 0.001089 |
| TSPAN1    | -1.80224 | 0.00595  | 0.043449 |
| LOC150381 | -1.80743 | 0.0003   | 0.004684 |
| GATA3-AS1 | -1.80773 | 0.0053   | 0.040041 |
| USP29     | -1.81548 | 5.00E-05 | 0.001089 |
| NTHL1     | -1.81726 | 0.0001   | 0.001954 |
| PRDM13    | -1.81875 | 0.00015  | 0.002736 |
| E2F2      | -1.82456 | 5.00E-05 | 0.001089 |
| AKR1C2    | -1.82762 | 0.0002   | 0.003428 |
| TUBA3E    | -1.82812 | 0.0008   | 0.009825 |
| FAM78A    | -1.83541 | 5.00E-05 | 0.001089 |
| TM4SF20   | -1.8371  | 5.00E-05 | 0.001089 |
| CRLF1     | -1.84338 | 0.0002   | 0.003428 |
| CLIC3     | -1.84428 | 0.0019   | 0.019025 |
| ABCB6     | -1.86537 | 5.00E-05 | 0.001089 |
| CRIP1     | -1.86788 | 5.00E-05 | 0.001089 |
| NUGGC     | -1.86812 | 5.00E-05 | 0.001089 |
| LINC00858 | -1.87454 | 5.00E-05 | 0.001089 |
| FZD2      | -1.8765  | 5.00E-05 | 0.001089 |
| KIF12     | -1.88456 | 0.0002   | 0.003428 |
| TRAPPC6A  | -1.89131 | 5.00E-05 | 0.001089 |
| ANKRD9    | -1.9     | 0.0001   | 0.001954 |
| CXXC5     | -1.90289 | 5.00E-05 | 0.001089 |
| CCND3     | -1.90798 | 5.00E-05 | 0.001089 |
| GLTPD2    | -1.91193 | 0.0002   | 0.003428 |
| ANKS4B    | -1.91492 | 5.00E-05 | 0.001089 |
| CBX2      | -1.93137 | 5.00E-05 | 0.001089 |
| LOC645249 | -1.93621 | 5.00E-05 | 0.001089 |
| HLA-DMB   | -1.94039 | 0.00035  | 0.005299 |
| FAM127C   | -1.95469 | 0.00075  | 0.009355 |
| MB        | -1.96073 | 0.0007   | 0.008891 |
| F7        | -1.96787 | 0.00025  | 0.004092 |
| TMEM37    | -1.97285 | 5.00E-05 | 0.001089 |
| METTL7B   | -1.9842  | 5.00E-05 | 0.001089 |
| SSR4P1    | -2.00647 | 0.00045  | 0.006411 |
| GLIPR1L1  | -2.01782 | 0.0018   | 0.018195 |
| NECAB2    | -2.02746 | 5.00E-05 | 0.001089 |
| GPRIN2    | -2.04684 | 5.00E-05 | 0.001089 |
| AKR7A3    | -2.04877 | 0.00525  | 0.039739 |
| SCTR      | -2.05663 | 0.0005   | 0.006979 |
| B3GNT1    | -2.05986 | 5.00E-05 | 0.001089 |
| CLEC11A   | -2.06655 | 0.00055  | 0.007519 |
| RNASE4    | -2.0918  | 0.00095  | 0.011119 |

|              |          |          |          |
|--------------|----------|----------|----------|
| BHLHA15      | -2.09775 | 0.00265  | 0.024071 |
| C17orf50     | -2.14006 | 0.002    | 0.01979  |
| CT49         | -2.1524  | 0.00075  | 0.009355 |
| KRTAP4-1     | -2.17713 | 0.0036   | 0.030077 |
| MIR210HG     | -2.18349 | 5.00E-05 | 0.001089 |
| ATOH8        | -2.19883 | 5.00E-05 | 0.001089 |
| KLHDC7A      | -2.26927 | 5.00E-05 | 0.001089 |
| OSGIN1       | -2.28319 | 5.00E-05 | 0.001089 |
| LINC00086    | -2.29224 | 0.00015  | 0.002736 |
| LOC113230    | -2.30113 | 5.00E-05 | 0.001089 |
| EMILIN1      | -2.32105 | 5.00E-05 | 0.001089 |
| NRTN         | -2.38775 | 0.00485  | 0.037622 |
| SFRP4        | -2.42583 | 5.00E-05 | 0.001089 |
| KRT4         | -2.46233 | 5.00E-05 | 0.001089 |
| NUPR1        | -2.50193 | 5.00E-05 | 0.001089 |
| SHH          | -2.52536 | 5.00E-05 | 0.001089 |
| KRT82        | -2.61671 | 5.00E-05 | 0.001089 |
| HMOX1        | -2.6431  | 5.00E-05 | 0.001089 |
| LOC100506229 | -2.66488 | 5.00E-05 | 0.001089 |
| EMID1        | -2.80838 | 0.0006   | 0.008024 |
| DHRS4L1      | -2.8223  | 0.00145  | 0.015348 |
| CPN1         | -2.91205 | 0.00025  | 0.004092 |
| CLDND2       | -2.98403 | 5.00E-05 | 0.001089 |

<sup>(a)</sup> probability of your false positive

<sup>(b)</sup> adjusted p-values found using an optimised False Discovery Rate (FDR) approach.

**Table S3. Differentially expressed genes in BTV8ΔNS4- compared to BTV8wt-infected A549 cells.**

| Gene symbol | Fold change (log2) | P-value <sup>(a)</sup> | Q-value <sup>(b)</sup> (<0.05) |
|-------------|--------------------|------------------------|--------------------------------|
| GBP1        | 3.14018            | 5.00E-05               | 0.003591                       |
| BST2        | 2.97403            | 5.00E-05               | 0.003591                       |
| TRIM22      | 2.93316            | 5.00E-05               | 0.003591                       |
| BATF2       | 2.93008            | 5.00E-05               | 0.003591                       |
| IFNB1       | 2.91208            | 5.00E-05               | 0.003591                       |
| IFNL3       | 2.82238            | 5.00E-05               | 0.003591                       |
| IFNL2       | 2.64721            | 5.00E-05               | 0.003591                       |
| CH25H       | 2.5473             | 5.00E-05               | 0.003591                       |
| SAMD9       | 2.50831            | 5.00E-05               | 0.003591                       |
| MC5R        | 2.50592            | 5.00E-05               | 0.003591                       |
| XAF1        | 2.49203            | 5.00E-05               | 0.003591                       |
| CMPK2       | 2.47945            | 5.00E-05               | 0.003591                       |
| IFI27       | 2.44843            | 5.00E-05               | 0.003591                       |
| PRR15       | 2.41891            | 5.00E-05               | 0.003591                       |
| IFITM1      | 2.37224            | 0.0001                 | 0.006252                       |
| IFI6        | 2.34314            | 5.00E-05               | 0.003591                       |
| MX1         | 2.27635            | 5.00E-05               | 0.003591                       |

|          |         |          |          |
|----------|---------|----------|----------|
| LAMP3    | 2.25638 | 5.00E-05 | 0.003591 |
| PARP10   | 2.24328 | 5.00E-05 | 0.003591 |
| RSAD2    | 2.23044 | 5.00E-05 | 0.003591 |
| HPCAL4   | 2.20213 | 0.00025  | 0.012378 |
| UBE2L6   | 2.17791 | 5.00E-05 | 0.003591 |
| SAMD9L   | 2.16761 | 5.00E-05 | 0.003591 |
| MX2      | 2.14045 | 5.00E-05 | 0.003591 |
| IFI16    | 2.12337 | 5.00E-05 | 0.003591 |
| HLA-F    | 2.11707 | 0.0002   | 0.010489 |
| DDX58    | 2.09414 | 5.00E-05 | 0.003591 |
| IFNL4    | 2.0924  | 5.00E-05 | 0.003591 |
| KCNS3    | 2.07421 | 0.0015   | 0.047076 |
| NLRCS    | 2.03646 | 5.00E-05 | 0.003591 |
| IFI35    | 2.01212 | 5.00E-05 | 0.003591 |
| IFIT1    | 2.01191 | 5.00E-05 | 0.003591 |
| TLR3     | 1.98784 | 5.00E-05 | 0.003591 |
| IFIT3    | 1.9659  | 5.00E-05 | 0.003591 |
| STAT2    | 1.94214 | 5.00E-05 | 0.003591 |
| APOL2    | 1.89646 | 5.00E-05 | 0.003591 |
| IFI27L2  | 1.8905  | 0.00065  | 0.024792 |
| STAT1    | 1.86782 | 5.00E-05 | 0.003591 |
| GBP3     | 1.83922 | 5.00E-05 | 0.003591 |
| IFNL1    | 1.82874 | 5.00E-05 | 0.003591 |
| OAS1     | 1.82602 | 5.00E-05 | 0.003591 |
| TRANK1   | 1.81973 | 5.00E-05 | 0.003591 |
| IFIT1B   | 1.79514 | 0.0006   | 0.023561 |
| USP18    | 1.78937 | 5.00E-05 | 0.003591 |
| NR1H4    | 1.78896 | 0.00015  | 0.008421 |
| APOL6    | 1.78076 | 5.00E-05 | 0.003591 |
| CD274    | 1.76901 | 5.00E-05 | 0.003591 |
| DDX60L   | 1.75608 | 5.00E-05 | 0.003591 |
| LMO2     | 1.73266 | 0.0013   | 0.043634 |
| IFITM3   | 1.7314  | 0.0016   | 0.049245 |
| HELZ2    | 1.72962 | 5.00E-05 | 0.003591 |
| CXCL11   | 1.69272 | 0.00065  | 0.024792 |
| IRF7     | 1.68603 | 5.00E-05 | 0.003591 |
| PSMB9    | 1.68053 | 0.0001   | 0.006252 |
| ISG15    | 1.67626 | 5.00E-05 | 0.003591 |
| SP110    | 1.66501 | 5.00E-05 | 0.003591 |
| IFIT2    | 1.66112 | 5.00E-05 | 0.003591 |
| RAET1L   | 1.64732 | 0.0004   | 0.017813 |
| SAMHD1   | 1.63653 | 5.00E-05 | 0.003591 |
| C19orf66 | 1.62591 | 0.00025  | 0.012378 |
| MYD88    | 1.62019 | 5.00E-05 | 0.003591 |
| DTX3L    | 1.60771 | 0.00015  | 0.008421 |
| NEUROD4  | 1.60283 | 0.00095  | 0.033959 |
| GBP4     | 1.59668 | 5.00E-05 | 0.003591 |
| OASL     | 1.59319 | 5.00E-05 | 0.003591 |
| OAS3     | 1.59305 | 5.00E-05 | 0.003591 |

|         |         |          |          |
|---------|---------|----------|----------|
| ULBP2   | 1.57916 | 0.0006   | 0.023561 |
| DDX60   | 1.57736 | 5.00E-05 | 0.003591 |
| TTC39B  | 1.53411 | 0.00065  | 0.024792 |
| IFI44   | 1.52205 | 5.00E-05 | 0.003591 |
| PLEKHA4 | 1.50765 | 5.00E-05 | 0.003591 |
| ERAP2   | 1.5065  | 0.00015  | 0.008421 |
| SEC16B  | 1.48137 | 0.0007   | 0.026136 |
| TAP1    | 1.47697 | 0.00015  | 0.008421 |
| TRIM21  | 1.449   | 5.00E-05 | 0.003591 |
| HLA-B   | 1.44067 | 0.0002   | 0.010489 |
| EGR3    | 1.43939 | 0.00025  | 0.012378 |
| APOL1   | 1.43459 | 0.0002   | 0.010489 |
| CFB     | 1.41816 | 0.0001   | 0.006252 |
| PMAIP1  | 1.41097 | 5.00E-05 | 0.003591 |
| PARP14  | 1.40239 | 0.0001   | 0.006252 |
| TRIM38  | 1.39633 | 5.00E-05 | 0.003591 |
| ST8SIA4 | 1.37122 | 0.0015   | 0.047076 |
| IFIT5   | 1.36304 | 0.0001   | 0.006252 |
| TAP2    | 1.3576  | 0.00085  | 0.031082 |
| HLA-C   | 1.33806 | 0.00035  | 0.016081 |
| MXD1    | 1.33105 | 5.00E-05 | 0.003591 |
| TDRD7   | 1.32125 | 5.00E-05 | 0.003591 |
| OTUD1   | 1.30353 | 0.00025  | 0.012378 |
| B2M     | 1.29837 | 5.00E-05 | 0.003591 |
| FAM46A  | 1.29746 | 0.0001   | 0.006252 |
| ACER2   | 1.29458 | 0.0004   | 0.017813 |
| CXCL1   | 1.28496 | 0.0003   | 0.014193 |
| LAP3    | 1.28368 | 0.0001   | 0.006252 |
| HERC6   | 1.26907 | 0.00025  | 0.012378 |
| FLRT3   | 1.25725 | 0.00025  | 0.012378 |
| TMEM47  | 1.24888 | 0.00065  | 0.024792 |
| TRIM25  | 1.24111 | 0.00035  | 0.016081 |
| IRF1    | 1.23749 | 0.0007   | 0.026136 |
| EGR4    | 1.22741 | 0.0005   | 0.021145 |
| CCL5    | 1.22149 | 0.00015  | 0.008421 |
| SP100   | 1.21649 | 0.0005   | 0.021145 |
| CXCL5   | 1.17883 | 0.00035  | 0.016081 |
| FAM84B  | 1.17252 | 0.0003   | 0.014193 |
| CXCL3   | 1.16635 | 0.00105  | 0.037118 |
| THBS1   | 1.16608 | 0.00055  | 0.022143 |
| HERC5   | 1.16438 | 0.00055  | 0.022143 |
| PLSCR1  | 1.15387 | 0.0006   | 0.023561 |
| CITED2  | 1.13106 | 0.00115  | 0.03926  |
| HOMER1  | 1.12072 | 0.0007   | 0.026136 |
| PARP12  | 1.11563 | 0.0015   | 0.047076 |
| IRF9    | 1.06493 | 0.0012   | 0.04088  |
| SAT1    | 1.06258 | 0.00045  | 0.019443 |
| TRNP1   | 1.0546  | 0.00125  | 0.042312 |
| RNF19B  | 1.04025 | 0.00135  | 0.044561 |

|              |          |          |          |
|--------------|----------|----------|----------|
| CCL2         | 1.02868  | 0.0016   | 0.049245 |
| IFIH1        | 1.00906  | 0.001    | 0.035508 |
| ANKRD10      | -1.05471 | 0.00135  | 0.044561 |
| PCF11        | -1.07775 | 0.00125  | 0.042312 |
| TUBB1        | -1.10784 | 0.0014   | 0.045645 |
| ZNF251       | -1.11366 | 0.00065  | 0.024792 |
| ARHGAP31     | -1.12698 | 0.0011   | 0.038375 |
| ALK          | -1.18148 | 0.0015   | 0.047076 |
| KLB          | -1.18621 | 0.00045  | 0.019443 |
| PPM1M        | -1.20217 | 0.0013   | 0.043634 |
| DDA1         | -1.2065  | 0.0005   | 0.021145 |
| DNAH1        | -1.21722 | 0.00065  | 0.024792 |
| FBXO36       | -1.22026 | 0.00085  | 0.031082 |
| FAM22D       | -1.22254 | 0.00055  | 0.022143 |
| MTSS1        | -1.2297  | 0.0004   | 0.017813 |
| ST3GAL6      | -1.25324 | 0.00055  | 0.022143 |
| GPR179       | -1.25375 | 0.00015  | 0.008421 |
| REEP1        | -1.25395 | 0.0015   | 0.047076 |
| TFAP4        | -1.27801 | 5.00E-05 | 0.003591 |
| LINC00641    | -1.28385 | 0.0002   | 0.010489 |
| MFSD4        | -1.28517 | 0.0009   | 0.032463 |
| SIGLEC16     | -1.28598 | 0.0013   | 0.043634 |
| LHFPL4       | -1.29358 | 0.00055  | 0.022143 |
| ST7L         | -1.29582 | 0.00025  | 0.012378 |
| DSCAML1      | -1.29729 | 0.0015   | 0.047076 |
| FBXW10       | -1.30191 | 0.0002   | 0.010489 |
| FAM124A      | -1.314   | 0.00075  | 0.027808 |
| MYPN         | -1.31592 | 0.0003   | 0.014193 |
| MEGF11       | -1.32231 | 0.0005   | 0.021145 |
| LOC100506548 | -1.32297 | 0.00015  | 0.008421 |
| PDZD2        | -1.32397 | 0.00035  | 0.016081 |
| UCP3         | -1.32564 | 0.00035  | 0.016081 |
| KIAA1549L    | -1.32767 | 5.00E-05 | 0.003591 |
| PCYT2        | -1.34143 | 0.0006   | 0.023561 |
| CRB2         | -1.35055 | 0.0009   | 0.032463 |
| GAL3ST1      | -1.35822 | 0.0011   | 0.038375 |
| ST5          | -1.35972 | 0.00025  | 0.012378 |
| C5AR1        | -1.37098 | 0.00015  | 0.008421 |
| LEAP2        | -1.37693 | 0.00075  | 0.027808 |
| ITGA10       | -1.38094 | 0.0007   | 0.026136 |
| TAS2R3       | -1.38473 | 0.0003   | 0.014193 |
| LOC339666    | -1.38598 | 0.0005   | 0.021145 |
| RSPH4A       | -1.39652 | 0.00145  | 0.04642  |
| RPS6KL1      | -1.39958 | 0.00015  | 0.008421 |
| MUC20        | -1.39975 | 0.0003   | 0.014193 |
| MTMR9LP      | -1.40239 | 0.00065  | 0.024792 |
| MAPT         | -1.40554 | 0.00025  | 0.012378 |
| RAB11FIP4    | -1.40711 | 0.00015  | 0.008421 |
| SHISA4       | -1.40904 | 0.00055  | 0.022143 |



|              |          |          |          |
|--------------|----------|----------|----------|
| ESR1         | -1.40949 | 0.00025  | 0.012378 |
| ADAM32       | -1.41154 | 0.0007   | 0.026136 |
| C11orf91     | -1.41548 | 0.0002   | 0.010489 |
| TRIM3        | -1.41992 | 5.00E-05 | 0.003591 |
| PON1         | -1.42133 | 0.00135  | 0.044561 |
| ABAT         | -1.42346 | 0.0006   | 0.023561 |
| MGC16275     | -1.43091 | 5.00E-05 | 0.003591 |
| PPP1R3F      | -1.43362 | 0.0003   | 0.014193 |
| CAND2        | -1.43519 | 5.00E-05 | 0.003591 |
| PITPNM3      | -1.43662 | 0.00035  | 0.016081 |
| SUSD5        | -1.44196 | 0.0004   | 0.017813 |
| MTHFD2L      | -1.44625 | 0.00115  | 0.03926  |
| ZSCAN5A      | -1.44731 | 5.00E-05 | 0.003591 |
| CCDC17       | -1.44944 | 0.0004   | 0.017813 |
| BAAT         | -1.45095 | 0.00025  | 0.012378 |
| LYST         | -1.45179 | 5.00E-05 | 0.003591 |
| LDHAL6A      | -1.46186 | 0.00015  | 0.008421 |
| HCRTR1       | -1.46494 | 0.00135  | 0.044561 |
| DDAH2        | -1.46511 | 0.00015  | 0.008421 |
| FAP          | -1.47516 | 0.00055  | 0.022143 |
| SLC10A1      | -1.47668 | 5.00E-05 | 0.003591 |
| WDR66        | -1.47987 | 5.00E-05 | 0.003591 |
| LOC643669    | -1.48364 | 0.00055  | 0.022143 |
| PYCARD       | -1.48452 | 0.00045  | 0.019443 |
| ANKLE1       | -1.48668 | 0.0002   | 0.010489 |
| LOC100499194 | -1.48854 | 0.0002   | 0.010489 |
| MMP14        | -1.48985 | 0.0001   | 0.006252 |
| SLC23A3      | -1.49316 | 0.0006   | 0.023561 |
| TAS2R5       | -1.4989  | 0.00045  | 0.019443 |
| NID1         | -1.49895 | 5.00E-05 | 0.003591 |
| ARHGEF4      | -1.4994  | 0.0006   | 0.023561 |
| DDN          | -1.49992 | 0.0006   | 0.023561 |
| SPRED3       | -1.49997 | 5.00E-05 | 0.003591 |
| CASQ1        | -1.50168 | 0.00045  | 0.019443 |
| CSPG5        | -1.50811 | 0.00115  | 0.03926  |
| PKI55        | -1.51262 | 5.00E-05 | 0.003591 |
| SLC16A12     | -1.52004 | 5.00E-05 | 0.003591 |
| RASD1        | -1.52363 | 5.00E-05 | 0.003591 |
| CRABP2       | -1.52739 | 0.00035  | 0.016081 |
| NID2         | -1.53418 | 0.00015  | 0.008421 |
| FES          | -1.53544 | 0.00065  | 0.024792 |
| IQSEC3       | -1.53851 | 0.0016   | 0.049245 |
| LGALS4       | -1.53916 | 0.0009   | 0.032463 |
| LINC00628    | -1.54094 | 0.0003   | 0.014193 |
| GUCA1B       | -1.54221 | 5.00E-05 | 0.003591 |
| CELF6        | -1.5441  | 0.00065  | 0.024792 |
| GTF2IRD2B    | -1.54634 | 5.00E-05 | 0.003591 |
| IFFO1        | -1.54997 | 0.0001   | 0.006252 |
| ZP1          | -1.55016 | 0.0011   | 0.038375 |

|              |          |          |          |
|--------------|----------|----------|----------|
| ADSSL1       | -1.55289 | 0.00045  | 0.019443 |
| PRICKLE1     | -1.55631 | 5.00E-05 | 0.003591 |
| CXorf36      | -1.55777 | 0.00055  | 0.022143 |
| SLC5A5       | -1.55867 | 0.0008   | 0.029456 |
| LTBP2        | -1.56407 | 5.00E-05 | 0.003591 |
| ALDOB        | -1.56552 | 0.0011   | 0.038375 |
| SOWAHD       | -1.56681 | 0.0015   | 0.047076 |
| MYH3         | -1.569   | 5.00E-05 | 0.003591 |
| ATCAY        | -1.56959 | 0.0002   | 0.010489 |
| EPX          | -1.57427 | 0.00095  | 0.033959 |
| PYGM         | -1.57538 | 0.0001   | 0.006252 |
| LYPD3        | -1.57618 | 0.0016   | 0.049245 |
| ZNF501       | -1.57851 | 0.00115  | 0.03926  |
| GPD1         | -1.581   | 5.00E-05 | 0.003591 |
| CAV3         | -1.59185 | 0.001    | 0.035508 |
| LOC149134    | -1.59973 | 0.00115  | 0.03926  |
| SMLR1        | -1.60083 | 0.0003   | 0.014193 |
| C2orf83      | -1.60125 | 0.0004   | 0.017813 |
| NLRP9        | -1.60702 | 0.00015  | 0.008421 |
| MASP2        | -1.61087 | 5.00E-05 | 0.003591 |
| FAM180B      | -1.61631 | 0.0015   | 0.047076 |
| SGPP2        | -1.61748 | 0.00035  | 0.016081 |
| UBQLNL       | -1.62322 | 0.00065  | 0.024792 |
| MARK2P9      | -1.63112 | 0.0016   | 0.049245 |
| VIL1         | -1.64454 | 0.00115  | 0.03926  |
| ART1         | -1.64678 | 0.0013   | 0.043634 |
| SERPINA1     | -1.65642 | 0.0003   | 0.014193 |
| KRBA2        | -1.65652 | 5.00E-05 | 0.003591 |
| SLC6A13      | -1.65845 | 0.0002   | 0.010489 |
| SLC4A9       | -1.66229 | 0.0007   | 0.026136 |
| FHDC1        | -1.66261 | 5.00E-05 | 0.003591 |
| EXOC3L2      | -1.66411 | 0.00015  | 0.008421 |
| HIPK4        | -1.66454 | 0.00045  | 0.019443 |
| FAM167B      | -1.67388 | 0.00155  | 0.048359 |
| GFRA3        | -1.67579 | 0.0011   | 0.038375 |
| NHLH1        | -1.67813 | 5.00E-05 | 0.003591 |
| LOC100128288 | -1.67966 | 5.00E-05 | 0.003591 |
| NODAL        | -1.68085 | 0.0001   | 0.006252 |
| LOC646862    | -1.68565 | 0.00115  | 0.03926  |
| MURC         | -1.69227 | 5.00E-05 | 0.003591 |
| PCDH12       | -1.69838 | 5.00E-05 | 0.003591 |
| ADAM20       | -1.70147 | 0.0005   | 0.021145 |
| PDE2A        | -1.70258 | 0.0001   | 0.006252 |
| ZMYND10      | -1.70297 | 0.0004   | 0.017813 |
| LINC00163    | -1.70594 | 0.0002   | 0.010489 |
| TBR1         | -1.71151 | 0.00045  | 0.019443 |
| CAPN3        | -1.71331 | 0.0009   | 0.032463 |
| HCLS1        | -1.71651 | 0.0002   | 0.010489 |
| SNCG         | -1.7177  | 0.0005   | 0.021145 |

|              |          |          |          |
|--------------|----------|----------|----------|
| CRHR2        | -1.71917 | 0.0001   | 0.006252 |
| SLC39A2      | -1.72367 | 0.00065  | 0.024792 |
| AOC4         | -1.7238  | 0.00025  | 0.012378 |
| FER1L5       | -1.72491 | 0.00015  | 0.008421 |
| TMEM236      | -1.72606 | 0.00085  | 0.031082 |
| COL8A2       | -1.72974 | 0.0001   | 0.006252 |
| CCDC62       | -1.73071 | 5.00E-05 | 0.003591 |
| ACRBP        | -1.73858 | 0.0002   | 0.010489 |
| AKR7L        | -1.74878 | 0.00025  | 0.012378 |
| PLBD1        | -1.75119 | 0.00055  | 0.022143 |
| TIGIT        | -1.75137 | 0.0001   | 0.006252 |
| TRIM72       | -1.75928 | 0.00135  | 0.044561 |
| SLC25A34     | -1.76067 | 5.00E-05 | 0.003591 |
| NLRP7        | -1.76236 | 0.00105  | 0.037118 |
| KCNB1        | -1.76652 | 0.0016   | 0.049245 |
| MYO15A       | -1.76724 | 5.00E-05 | 0.003591 |
| MYH15        | -1.76983 | 5.00E-05 | 0.003591 |
| FOXD4        | -1.77213 | 5.00E-05 | 0.003591 |
| ALPK3        | -1.78517 | 5.00E-05 | 0.003591 |
| LOC100505495 | -1.78565 | 5.00E-05 | 0.003591 |
| NPR2         | -1.78636 | 5.00E-05 | 0.003591 |
| TAS2R9       | -1.79231 | 0.0009   | 0.032463 |
| CCDC19       | -1.79389 | 0.00065  | 0.024792 |
| RASGRP2      | -1.79443 | 0.0009   | 0.032463 |
| LRIT3        | -1.79761 | 0.0014   | 0.045645 |
| LILRB3       | -1.79809 | 5.00E-05 | 0.003591 |
| HRH3         | -1.80375 | 0.00055  | 0.022143 |
| CLEC18A      | -1.80823 | 0.0002   | 0.010489 |
| GPR4         | -1.8096  | 0.0003   | 0.014193 |
| PIGZ         | -1.81834 | 0.0007   | 0.026136 |
| FLJ33360     | -1.81885 | 0.0015   | 0.047076 |
| FAM90A1      | -1.8307  | 0.00115  | 0.03926  |
| FAM154B      | -1.83109 | 0.00015  | 0.008421 |
| FOXD4L2      | -1.84361 | 5.00E-05 | 0.003591 |
| CNTD2        | -1.848   | 5.00E-05 | 0.003591 |
| KRT8P41      | -1.84994 | 0.0001   | 0.006252 |
| TEX35        | -1.85397 | 0.0004   | 0.017813 |
| NKAPL        | -1.85588 | 0.0001   | 0.006252 |
| CATSPERD     | -1.85834 | 0.0003   | 0.014193 |
| C6orf25      | -1.85954 | 5.00E-05 | 0.003591 |
| RSPH6A       | -1.86814 | 0.00015  | 0.008421 |
| CALHM1       | -1.86841 | 5.00E-05 | 0.003591 |
| KIF17        | -1.86884 | 5.00E-05 | 0.003591 |
| CYP26A1      | -1.87083 | 0.0001   | 0.006252 |
| LZTS1        | -1.87139 | 5.00E-05 | 0.003591 |
| B3GNT4       | -1.87676 | 5.00E-05 | 0.003591 |
| CRYBA1       | -1.8849  | 0.0003   | 0.014193 |
| LILRA6       | -1.88617 | 5.00E-05 | 0.003591 |
| SEMA4A       | -1.88851 | 0.0004   | 0.017813 |

|              |          |          |          |
|--------------|----------|----------|----------|
| ZNF610       | -1.88998 | 0.0004   | 0.017813 |
| TINCR        | -1.89323 | 5.00E-05 | 0.003591 |
| SBSN         | -1.89499 | 0.00055  | 0.022143 |
| TCAP         | -1.9031  | 0.0002   | 0.010489 |
| MFRP         | -1.91084 | 0.00025  | 0.012378 |
| SOST         | -1.91165 | 0.0014   | 0.045645 |
| RNF183       | -1.9118  | 0.0005   | 0.021145 |
| LY6G5C       | -1.91304 | 0.0002   | 0.010489 |
| SSUH2        | -1.92319 | 5.00E-05 | 0.003591 |
| KBTBD13      | -1.92535 | 5.00E-05 | 0.003591 |
| C7orf61      | -1.92632 | 0.00115  | 0.03926  |
| FAM221B      | -1.93557 | 0.00055  | 0.022143 |
| APOE         | -1.93567 | 5.00E-05 | 0.003591 |
| PYROXD2      | -1.94141 | 0.00025  | 0.012378 |
| RDH12        | -1.94492 | 0.0002   | 0.010489 |
| KLHL35       | -1.94592 | 0.0002   | 0.010489 |
| RYR1         | -1.9461  | 5.00E-05 | 0.003591 |
| MTUS2        | -1.94815 | 5.00E-05 | 0.003591 |
| FAM163A      | -1.95539 | 0.00055  | 0.022143 |
| SFRP5        | -1.97419 | 5.00E-05 | 0.003591 |
| RASL10B      | -1.97696 | 5.00E-05 | 0.003591 |
| SNX29P2      | -1.9806  | 0.0001   | 0.006252 |
| CD5          | -1.98655 | 0.00015  | 0.008421 |
| CCDC11       | -2.00638 | 5.00E-05 | 0.003591 |
| POU2F2       | -2.01441 | 5.00E-05 | 0.003591 |
| LOC100130705 | -2.02375 | 5.00E-05 | 0.003591 |
| SLC6A4       | -2.0277  | 5.00E-05 | 0.003591 |
| PNLDC1       | -2.03458 | 0.00015  | 0.008421 |
| LOC728175    | -2.03474 | 0.00055  | 0.022143 |
| TG           | -2.03992 | 5.00E-05 | 0.003591 |
| MSH4         | -2.04681 | 5.00E-05 | 0.003591 |
| VWCE         | -2.05176 | 0.0001   | 0.006252 |
| KLK14        | -2.05257 | 0.00135  | 0.044561 |
| IL18RAP      | -2.05367 | 0.0014   | 0.045645 |
| HAPLN4       | -2.05942 | 0.0007   | 0.026136 |
| LPAR5        | -2.06179 | 0.0004   | 0.017813 |
| LINC00654    | -2.06492 | 5.00E-05 | 0.003591 |
| F13B         | -2.0664  | 0.00055  | 0.022143 |
| GPR151       | -2.07033 | 0.0001   | 0.006252 |
| TRABD2A      | -2.07601 | 5.00E-05 | 0.003591 |
| HAVCR2       | -2.08154 | 5.00E-05 | 0.003591 |
| CILP2        | -2.09392 | 5.00E-05 | 0.003591 |
| FOXD4L5      | -2.0978  | 0.0001   | 0.006252 |
| SLC25A42     | -2.10545 | 5.00E-05 | 0.003591 |
| VWA3A        | -2.11576 | 0.00015  | 0.008421 |
| EFCAB12      | -2.12151 | 0.0008   | 0.029456 |
| NRADDP       | -2.12868 | 0.00015  | 0.008421 |
| LOC100128770 | -2.1303  | 5.00E-05 | 0.003591 |
| GTF2IRD2P1   | -2.14051 | 0.0001   | 0.006252 |

|              |          |          |          |
|--------------|----------|----------|----------|
| TRPC7        | -2.1475  | 5.00E-05 | 0.003591 |
| FAM83C       | -2.15004 | 5.00E-05 | 0.003591 |
| SLC6A12      | -2.15199 | 5.00E-05 | 0.003591 |
| GOLGA6C      | -2.16094 | 0.00015  | 0.008421 |
| FBLL1        | -2.1685  | 5.00E-05 | 0.003591 |
| MYO1A        | -2.17486 | 5.00E-05 | 0.003591 |
| FUT3         | -2.1785  | 0.0003   | 0.014193 |
| FOXD4L6      | -2.19147 | 5.00E-05 | 0.003591 |
| MYOZ3        | -2.19159 | 5.00E-05 | 0.003591 |
| GPBAR1       | -2.19196 | 5.00E-05 | 0.003591 |
| HAPLN2       | -2.19291 | 5.00E-05 | 0.003591 |
| ACTN3        | -2.19699 | 5.00E-05 | 0.003591 |
| RFPL3S       | -2.20766 | 5.00E-05 | 0.003591 |
| OVGP1        | -2.21362 | 5.00E-05 | 0.003591 |
| SLC45A2      | -2.21882 | 0.0001   | 0.006252 |
| LMOD1        | -2.2351  | 5.00E-05 | 0.003591 |
| PTAFR        | -2.23785 | 5.00E-05 | 0.003591 |
| TSPAN1       | -2.24287 | 0.0015   | 0.047076 |
| TRHR         | -2.25007 | 0.0001   | 0.006252 |
| SCN5A        | -2.25198 | 5.00E-05 | 0.003591 |
| DQX1         | -2.27897 | 5.00E-05 | 0.003591 |
| PAX6         | -2.28336 | 5.00E-05 | 0.003591 |
| PTH1R        | -2.29979 | 0.0001   | 0.006252 |
| GTF2IRD2     | -2.30771 | 5.00E-05 | 0.003591 |
| MMRN2        | -2.30835 | 5.00E-05 | 0.003591 |
| FGF23        | -2.30899 | 5.00E-05 | 0.003591 |
| MAGEA8       | -2.31811 | 5.00E-05 | 0.003591 |
| ARL9         | -2.32698 | 5.00E-05 | 0.003591 |
| ANKK1        | -2.32707 | 5.00E-05 | 0.003591 |
| IL13         | -2.34279 | 0.0001   | 0.006252 |
| C3orf20      | -2.34809 | 5.00E-05 | 0.003591 |
| PROZ         | -2.34853 | 5.00E-05 | 0.003591 |
| NPC1L1       | -2.36663 | 5.00E-05 | 0.003591 |
| ASGR1        | -2.36795 | 5.00E-05 | 0.003591 |
| PRRT1        | -2.37736 | 0.00095  | 0.033959 |
| N4BP2L1      | -2.38521 | 5.00E-05 | 0.003591 |
| SFTPA1       | -2.38557 | 5.00E-05 | 0.003591 |
| GPR84        | -2.38783 | 0.00015  | 0.008421 |
| RAPSN        | -2.39433 | 5.00E-05 | 0.003591 |
| TRIM40       | -2.40237 | 0.00035  | 0.016081 |
| TPRX1        | -2.40584 | 0.0001   | 0.006252 |
| FOXD4L1      | -2.42932 | 5.00E-05 | 0.003591 |
| WNT2B        | -2.43211 | 5.00E-05 | 0.003591 |
| NFE2         | -2.43301 | 5.00E-05 | 0.003591 |
| IL17RE       | -2.43853 | 5.00E-05 | 0.003591 |
| LOC100507140 | -2.44036 | 0.00125  | 0.042312 |
| SLC28A1      | -2.44199 | 0.0002   | 0.010489 |
| LECT1        | -2.44463 | 0.0016   | 0.049245 |
| FAM109B      | -2.45378 | 0.00015  | 0.008421 |

|              |          |          |          |
|--------------|----------|----------|----------|
| FAM209B      | -2.45637 | 5.00E-05 | 0.003591 |
| SPTSSB       | -2.45911 | 0.00095  | 0.033959 |
| NAT8         | -2.46647 | 0.0011   | 0.038375 |
| SPACA4       | -2.46924 | 0.0006   | 0.023561 |
| MPP4         | -2.47138 | 0.0003   | 0.014193 |
| EPPK1        | -2.47763 | 5.00E-05 | 0.003591 |
| ETV2         | -2.48924 | 5.00E-05 | 0.003591 |
| LOC100507206 | -2.49054 | 0.00015  | 0.008421 |
| RSPH10B2     | -2.51123 | 0.00035  | 0.016081 |
| LHX3         | -2.52268 | 0.00045  | 0.019443 |
| MMP28        | -2.52639 | 0.00025  | 0.012378 |
| CYP2A7       | -2.5276  | 0.00045  | 0.019443 |
| TLR9         | -2.53418 | 5.00E-05 | 0.003591 |
| TLX2         | -2.53958 | 5.00E-05 | 0.003591 |
| LY6G6C       | -2.54466 | 5.00E-05 | 0.003591 |
| CPT1C        | -2.56802 | 5.00E-05 | 0.003591 |
| PKD1L1       | -2.57102 | 5.00E-05 | 0.003591 |
| MMP25        | -2.5829  | 5.00E-05 | 0.003591 |
| TTC24        | -2.58564 | 5.00E-05 | 0.003591 |
| ADCY4        | -2.58649 | 5.00E-05 | 0.003591 |
| CHRM1        | -2.59838 | 5.00E-05 | 0.003591 |
| LRRC66       | -2.6013  | 5.00E-05 | 0.003591 |
| LMOD2        | -2.60341 | 5.00E-05 | 0.003591 |
| ACTA1        | -2.60905 | 5.00E-05 | 0.003591 |
| FNDC7        | -2.61593 | 5.00E-05 | 0.003591 |
| HK3          | -2.61841 | 5.00E-05 | 0.003591 |
| KIAA1045     | -2.62861 | 5.00E-05 | 0.003591 |
| SLC7A9       | -2.63095 | 5.00E-05 | 0.003591 |
| NEB          | -2.64404 | 5.00E-05 | 0.003591 |
| SCUBE2       | -2.65382 | 5.00E-05 | 0.003591 |
| CYP2G1P      | -2.65475 | 5.00E-05 | 0.003591 |
| OLFML2B      | -2.65876 | 5.00E-05 | 0.003591 |
| LRRC10       | -2.68089 | 5.00E-05 | 0.003591 |
| LOC153910    | -2.70534 | 5.00E-05 | 0.003591 |
| FOXD4L3      | -2.70811 | 5.00E-05 | 0.003591 |
| EFNA2        | -2.70858 | 5.00E-05 | 0.003591 |
| AOC3         | -2.72256 | 5.00E-05 | 0.003591 |
| OIT3         | -2.73746 | 5.00E-05 | 0.003591 |
| DHDH         | -2.74564 | 5.00E-05 | 0.003591 |
| GRK7         | -2.7544  | 0.0001   | 0.006252 |
| FAM83E       | -2.76319 | 5.00E-05 | 0.003591 |
| RPRML        | -2.76673 | 5.00E-05 | 0.003591 |
| BST1         | -2.76895 | 5.00E-05 | 0.003591 |
| TRPM5        | -2.7777  | 5.00E-05 | 0.003591 |
| LTA          | -2.78835 | 5.00E-05 | 0.003591 |
| SYT5         | -2.78955 | 5.00E-05 | 0.003591 |
| LGR5         | -2.79614 | 5.00E-05 | 0.003591 |
| KLRK1        | -2.79968 | 0.0014   | 0.045645 |
| GOLGA6A      | -2.81302 | 0.0001   | 0.006252 |

|            |          |          |          |
|------------|----------|----------|----------|
| FOXS1      | -2.81649 | 5.00E-05 | 0.003591 |
| SV2A       | -2.82714 | 5.00E-05 | 0.003591 |
| TAS2R7     | -2.82854 | 0.00075  | 0.027808 |
| WNT8B      | -2.83173 | 0.00025  | 0.012378 |
| S100A5     | -2.84252 | 5.00E-05 | 0.003591 |
| ARL10      | -2.84528 | 5.00E-05 | 0.003591 |
| MYOC       | -2.86007 | 0.00045  | 0.019443 |
| CTRC       | -2.86048 | 0.0008   | 0.029456 |
| POU1F1     | -2.8657  | 0.0007   | 0.026136 |
| C6orf222   | -2.88514 | 5.00E-05 | 0.003591 |
| OVOL1      | -2.92359 | 5.00E-05 | 0.003591 |
| PDLIM4     | -2.92507 | 0.0003   | 0.014193 |
| EPHA8      | -2.96804 | 5.00E-05 | 0.003591 |
| SHD        | -2.97102 | 5.00E-05 | 0.003591 |
| C1orf189   | -2.98218 | 5.00E-05 | 0.003591 |
| GUCY2D     | -2.98813 | 0.0002   | 0.010489 |
| OXER1      | -3.01213 | 5.00E-05 | 0.003591 |
| FUT5       | -3.02069 | 0.0006   | 0.023561 |
| C1orf162   | -3.03857 | 5.00E-05 | 0.003591 |
| FAM71F1    | -3.10421 | 5.00E-05 | 0.003591 |
| CASS4      | -3.10627 | 5.00E-05 | 0.003591 |
| SLC2A9     | -3.14108 | 0.00055  | 0.022143 |
| GADL1      | -3.14387 | 0.0001   | 0.006252 |
| CACNG1     | -3.14573 | 0.0001   | 0.006252 |
| POPDC2     | -3.14889 | 5.00E-05 | 0.003591 |
| MRPL23-AS1 | -3.17037 | 5.00E-05 | 0.003591 |
| RNF112     | -3.18358 | 5.00E-05 | 0.003591 |
| ESRRB      | -3.18373 | 0.00015  | 0.008421 |
| GPR152     | -3.20663 | 5.00E-05 | 0.003591 |
| MTNR1A     | -3.24022 | 5.00E-05 | 0.003591 |
| GOLGA6B    | -3.26519 | 0.00025  | 0.012378 |
| GAS2L2     | -3.26743 | 5.00E-05 | 0.003591 |
| LY6G6D     | -3.29162 | 0.00135  | 0.044561 |
| CD79A      | -3.29471 | 5.00E-05 | 0.003591 |
| ITGA9      | -3.39668 | 5.00E-05 | 0.003591 |
| C13orf45   | -3.40161 | 0.00055  | 0.022143 |
| PLA2G12B   | -3.45431 | 0.00055  | 0.022143 |
| IRGC       | -3.51001 | 0.00015  | 0.008421 |
| GSTM2P1    | -3.56487 | 5.00E-05 | 0.003591 |
| C19orf69   | -3.62239 | 0.00155  | 0.048359 |
| CYP2A6     | -3.64568 | 0.0001   | 0.006252 |
| TSGA10IP   | -3.68956 | 5.00E-05 | 0.003591 |
| MOBP       | -4.02337 | 5.00E-05 | 0.003591 |
| HPX        | -4.13135 | 5.00E-05 | 0.003591 |
| LRRC43     | -4.15833 | 0.00015  | 0.008421 |

<sup>(a)</sup> probability of your false positive

<sup>(b)</sup> adjusted p-values found using an optimised False Discovery Rate (FDR) approach.
